# Supplementary material
Source: HighWire-hosted journal article supplement (https://jmg.bmj.com/content/55/11/735)
Supplement: inline-supplementary-material-10 [file inline-supplementary-material-10.xls]

## Sheet: Table S5
Supplementary Table S5 Percent overlap between Gold Standard deletions > 100kb and those called by WGS
	WGS CNVs			Gold Standard CNVs > 100Kb
Library	Chr	Start	End	Chr	Start	End	Overlap	(%) Gold Standard CNV that is overlapped
1X, 3kb mate-pair	3	162515001	162635000	3	162514471	162625647	110646	0.995233
	4	69365001	69490000	4	69375591	69491543	114409	0.986693
	4	70120001	70235000	4	70122981	70231746	108765	1
	6	78966862	79037222	6	78892808	79053430	70360	0.438047
	8	39235001	39380000	8	39195825	39389230	144999	0.749717
	11	4245001	4335000	11	4248265	4353229	86735	0.826331
	19	20505001	20720000	19	20595835	20717950	122115	1
3X, 3kb mate-pair	3	162515001	162630000	3	162514471	162625647	110646	0.995233
	4	69375001	69490000	4	69375591	69491543	114409	0.986693
	4	70120001	70235000	4	70122981	70231746	108765	1
	6	78967160	79036996	6	78892808	79053430	69836	0.434785
	8	39230001	39385000	8	39195825	39389230	154999	0.801422
	11	4240001	4320000	11	4248265	4353229	71735	0.683425
	19	20505001	20720000	19	20595835	20717950	122115	1
5X, 3kb mate-pair	3	162515001	162625000	3	162514471	162625647	109999	0.989413
	4	69370001	69490000	4	69375591	69491543	114409	0.986693
	4	70125001	70235000	4	70122981	70231746	106745	0.981428
	6	78967160	79036837	6	78892808	79053430	69677	0.433795
	8	39230001	39385000	8	39195825	39389230	154999	0.801422
	11	4250001	4320000	11	4248265	4353229	69999	0.666886
	19	20505001	20720000	19	20595835	20717950	122115	1
1X, 5kb mate-pair	3	162515001	162625000	3	162514471	162625647	109999	0.989413
	4	69375001	69490000	4	69375591	69491543	114409	0.986693
	4	70125001	70230000	4	70122981	70231746	104999	0.965375
	6	78966432	79037454	6	78892808	79053430	71022	0.442169
	8	39230001	39385000	8	39195825	39389230	154999	0.801422
	11	4250001	4340000	11	4248265	4353229	89999	0.857427
	19	20505001	20715000	19	20595835	20717950	119165	0.975842
3X, 5kb mate-pair	3	162510001	162625000	3	162514471	162625647	110529	0.99418
	4	69375001	69490000	4	69375591	69491543	114409	0.986693
	4	70125001	70230000	4	70122981	70231746	104999	0.965375
	6	78967144	79037104	6	78892808	79053430	69960	0.435557
	8	39230001	39385000	8	39195825	39389230	154999	0.801422
	11	4250001	4340000	11	4248265	4353229	89999	0.857427
	19	20505001	20715000	19	20595835	20717950	119165	0.975842
5X, 5kb mate-pair	3	162510001	162625000	3	162514471	162625647	110529	0.99418
	4	69375001	69490000	4	69375591	69491543	114409	0.986693
	4	70125001	70235000	4	70122981	70231746	106745	0.981428
	6	78967144	79036592	6	78892808	79053430	69448	0.432369
	8	39230001	39385000	8	39195825	39389230	154999	0.801422
	11	4250001	4315000	11	4248265	4353229	64999	0.61925
	19	20505001	20715000	19	20595835	20717950	119165	0.975842
1X, short-insert	3	162510001	162625000	3	162514471	162625647	110529	0.99418
	4	69170001	69880000	4	69375591	69491543	115952	1
	4	70125001	70240000	4	70122981	70231746	106745	0.981428
	6	78965001	79040000	6	78892808	79053430	74999	0.466929
	8	39230001	39390000	8	39195825	39389230	159229	0.823293
	11	4240001	4320000	11	4248265	4353229	71735	0.683425
	19	20505001	20720000	19	20595835	20717950	122115	1
3X, short-insert	3	162510001	162625000	3	162514471	162625647	110529	0.99418
	4	69170001	69880000	4	69375591	69491543	115952	1
	4	70125001	70235000	4	70122981	70231746	106745	0.981428
	6	78965001	79035000	6	78892808	79053430	69999	0.4358
	8	39230001	39385000	8	39195825	39389230	154999	0.801422
	11	4250001	4310000	11	4248265	4353229	59999	0.571615
	19	20505001	20720000	19	20595835	20717950	122115	1
5X, short-insert	3	162510001	162625000	3	162514471	162625647	110529	0.99418
	4	69170001	69880000	4	69375591	69491543	115952	1
	4	70125001	70230000	4	70122981	70231746	104999	0.965375
	6	78965001	79035000	6	78892808	79053430	69999	0.4358
	8	39230001	39385000	8	39195825	39389230	154999	0.801422
	11	4245001	4335000	11	4248265	4353229	86735	0.826331
	19	20505001	20720000	19	20595835	20717950	122115	1
