# Supplementary material
Source: HighWire-hosted journal article supplement (https://jmg.bmj.com/content/55/11/735)
Supplement: inline-supplementary-material-12 [file inline-supplementary-material-12.xls]

## Sheet: unique to arrays
Table S7. GS CNVs called in arrays but not WGS
Chr	Start	End	Size	Type	Filter from WGS CNV Analysis	Possible Reason for Non-Detection in WGS
1	17026064	17052112	26048	duplication	segmental duplications
1	248619876	248634579	14703	duplication	segmental duplications
1	248756741	248797597	40856	deletion		segmental duplication boundaries
2	51926595	51927817	1222	deletion		approx. 1 kb or less in length
3	13141433	13142591	1158	deletion		approx. 1 kb or less in length
6	32604936	32616132	11196	deletion	MHC
8	12237311	12251515	14204	deletion	segmental duplications
9	10404415	10405176	761	deletion		approx. 1 kb or less in length
9	10404562	10405091	529	deletion		approx. 1 kb or less in length
11	50345849	50404924	59075	duplication	ENCODE blacklist region
16	20545137	20554003	8866	deletion	segmental duplications
16	33446163	33480261	34098	duplication	segmental duplications
16	33470755	33495606	24851	duplication	segmental duplications
16	33484521	33543753	59232	duplication	segmental duplications
16	33524565	33570784	46219	duplication	segmental duplications
16	33588532	33626594	38062	duplication		bounded by segmental duplications
17	44165338	44211686	46348	duplication	artifact
17	44230893	44262697	31804	duplication	artifact
17	44341412	44366497	25085	duplication	artifact & Segmental duplications
19	54727998	54746910	18912	duplication		bounded by segmental duplications

## Sheet: unique to WGS
Table S7. GS CNVs called in WGS but not in arrays
Chr	Start	End	Type
1	9595360	9597869	deletion
1	16151682	16155632	deletion
1	31574934	31577199	deletion
1	35101427	35111985	deletion
1	39998246	40001288	deletion
1	58743910	58744826	deletion
1	60048628	60049655	deletion
1	68007970	68008811	deletion
1	78649157	78654148	deletion
1	84517858	84524770	deletion
1	108402972	108405499	deletion
1	109573240	109575184	deletion
1	110187159	110191392	deletion
1	112834896	112837824	deletion
1	116229468	116232839	deletion
1	143984622	144094733	duplication
1	148832244	148954132	duplication
1	149289438	149358445	duplication
1	152555495	152586932	deletion
1	158867540	158869980	deletion
1	158961353	158966208	deletion
1	159014810	159018679	deletion
1	159648708	159649659	deletion
1	185009806	185011738	deletion
1	187464747	187466829	deletion
1	188539457	188540228	deletion
1	194451056	194454312	deletion
1	207542027	207545525	deletion
1	213083966	213086597	deletion
1	222374169	222380531	deletion
1	233962115	233963557	deletion
1	235537077	235538345	deletion
1	236548998	236551425	deletion
1	248839443	248841018	deletion
2	3732802	3738024	deletion
2	16271567	16273799	deletion
2	22688399	22690107	deletion
2	33224462	33227296	deletion
2	34523576	34525669	deletion
2	41973027	41976041	deletion
2	42346265	42347320	deletion
2	59623256	59631071	deletion
2	66505568	66507543	deletion
2	76773559	76775450	deletion
2	79076573	79081208	deletion
2	98136216	98156567	deletion
2	106694799	106696035	deletion
2	106695055	106695893	deletion
2	108855423	108856274	deletion
2	109689981	109695337	deletion
2	123477289	123482545	deletion
2	126443247	126451831	deletion
2	127674757	127677270	deletion
2	129638388	129646200	deletion
2	130954939	130957401	deletion
2	133671912	133674536	deletion
2	151031127	151038285	deletion
2	155818938	155833162	deletion
2	159958908	159961502	deletion
2	167494545	167500589	duplication
2	177265639	177272040	deletion
2	180065283	180082019	deletion
2	194689469	194698782	deletion
2	204181530	204191631	deletion
2	209942971	209948927	deletion
2	215728762	215730832	deletion
2	217955891	217957273	deletion
2	220052322	220052915	deletion
2	220052751	220056378	deletion
3	6650202	6654630	deletion
3	11108255	11111870	deletion
3	16239410	16241213	deletion
3	18729954	18730777	deletion
3	21723722	21725954	deletion
3	26450940	26452301	deletion
3	33553189	33554075	deletion
3	47490669	47493444	deletion
3	68634740	68640254	deletion
3	68739655	68747879	deletion
3	95465761	95468120	deletion
3	98943804	98949516	deletion
3	111243593	111248855	deletion
3	124936320	124937213	deletion
3	131708252	131713384	deletion
3	136020924	136026326	deletion
3	137314460	137316441	deletion
3	146385228	146390409	deletion
3	159461335	159463463	deletion
3	162717258	162723563	deletion
3	177294475	177297489	deletion
3	177381336	177385447	deletion
3	178550124	178550897	deletion
3	187732878	187734849	deletion
3	189737175	189740648	deletion
3	194398762	194400296	deletion
3	195198396	195222983	deletion
3	196934563	196939253	deletion
4	4124334	4152937	deletion
4	6651592	6652912	deletion
4	6894769	6895995	deletion
4	6897351	6900401	deletion
4	9157568	9214307	deletion
4	9457406	9481022	deletion
4	10392397	10402099	deletion
4	61330102	61333188	deletion
4	61939189	61942243	deletion
4	64783584	64784554	deletion
4	86976375	86979957	deletion
4	91931556	91935838	deletion
4	91931666	91933538	deletion
4	91933849	91936097	deletion
4	102787786	102788351	deletion
4	107437718	107438504	deletion
4	107604298	107609292	deletion
4	115928726	115931880	deletion
4	133180785	133182979	deletion
4	145316454	145319900	deletion
4	163394004	163396424	deletion
4	166002564	166005042	deletion
4	167892469	167893612	deletion
4	172988631	172992933	deletion
4	180097876	180098507	deletion
4	190058006	190064283	deletion
5	1178257	1180716	deletion
5	1924587	1925201	deletion
5	10273288	10275414	deletion
5	12811023	12820529	deletion
5	21450197	21452448	deletion
5	23903003	23905242	deletion
5	26796753	26801901	deletion
5	46270626	46275825	deletion
5	57320371	57338133	deletion
5	60001696	60003676	deletion
5	63698343	63701359	deletion
5	65028069	65030371	deletion
5	78109796	78111867	deletion
5	86115330	86117863	deletion
5	86246008	86247146	deletion
5	90499767	90502128	deletion
5	98345117	98347479	deletion
5	98839884	98842906	deletion
5	106236884	106239672	deletion
5	119380174	119382671	deletion
5	121059232	121060007	deletion
5	127335985	127336914	deletion
5	135115148	135120700	deletion
5	136854589	136856557	deletion
5	178109064	178113416	deletion
6	666377	667821	deletion
6	10264425	10265263	deletion
6	13882549	13883852	deletion
6	18402112	18402924	deletion
6	23743262	23745947	deletion
6	24811806	24818032	deletion
6	26739614	26748928	deletion
6	29843522	29849190	deletion
6	29899944	29901525	deletion
6	33026721	33028605	deletion
6	33583080	33585984	deletion
6	33937733	33943212	deletion
6	35754684	35766728	duplication
6	48930367	48938308	deletion
6	57622956	57627965	deletion
6	58423749	58428880	deletion
6	64667011	64668349	deletion
6	66260136	66262101	deletion
6	66595036	66595830	deletion
6	67040806	67043182	deletion
6	72863591	72873663	deletion
6	74613607	74620405	deletion
6	77097464	77102643	deletion
6	100034558	100035368	deletion
6	105260827	105263756	deletion
6	132106590	132108812	deletion
6	132375191	132378994	deletion
6	141548586	141550030	deletion
6	151485895	151486930	deletion
6	157699892	157703260	deletion
6	165724643	165732122	deletion
6	167488092	167489637	deletion
7	1185070	1187665	deletion
7	1856001	1863597	deletion
7	10504231	10506240	deletion
7	22434787	22436761	deletion
7	26137220	26145486	deletion
7	28574294	28575147	deletion
7	31315571	31318949	deletion
7	32774939	32777677	deletion
7	36441167	36441941	deletion
7	39820096	39825204	deletion
7	51594315	51598689	deletion
7	56761980	56769951	deletion
7	61971096	61975635	deletion
7	62002293	62004875	deletion
7	66697508	66699312	deletion
7	72270263	72275846	deletion
7	73828493	73831271	deletion
7	81441546	81442495	deletion
7	83050175	83051201	deletion
7	89810410	89812602	deletion
7	91214111	91220934	deletion
7	93416961	93422984	deletion
7	96543286	96546589	deletion
7	97395289	97402641	deletion
7	101001253	101005499	deletion
7	126045887	126051450	deletion
7	127214967	127217988	deletion
7	151230200	151231843	deletion
7	158046568	158047317	deletion
8	594395	599417	deletion
8	2132773	2270819	duplication
8	4122887	4124965	deletion
8	6991759	6995386	deletion
8	11245530	11247217	deletion
8	12389850	12428478	duplication
8	30603903	30605523	deletion
8	32679960	32691259	deletion
8	39885685	39890841	deletion
8	42190387	42194352	deletion
8	49093381	49093979	deletion
8	75362835	75366959	deletion
8	94072346	94077192	deletion
8	96875231	96879582	deletion
8	118873794	118875589	deletion
8	132277657	132280535	deletion
8	137160271	137163814	deletion
8	144700481	144714696	deletion
8	146057037	146057833	deletion
9	15815277	15821947	deletion
9	17909347	17912848	deletion
9	23362812	23377678	deletion
9	29092522	29098026	deletion
9	31291353	31292673	deletion
9	33213068	33213929	deletion
9	36362880	36364079	deletion
9	39002061	39024618	duplication
9	39044749	39055764	duplication
9	39089689	39125233	duplication
9	39140766	39206559	duplication
9	43612172	43623150	deletion
9	44235869	44252311	deletion
9	44255190	44276471	deletion
9	83967915	83970682	deletion
9	89154576	89155912	deletion
9	96500167	96503037	deletion
9	101309042	101311668	deletion
9	104714844	104724482	deletion
9	131412056	131413976	deletion
9	131700957	131702150	deletion
9	133030640	133034805	deletion
9	138214060	138217603	deletion
9	140253527	140255973	deletion
10	4708523	4710520	deletion
10	5889589	5892807	deletion
10	6097370	6097868	deletion
10	7077041	7078303	deletion
10	24376838	24378445	deletion
10	27224091	27228168	deletion
10	31246748	31251766	deletion
10	42701553	42716791	deletion
10	46976292	47023561	duplication
10	47007970	47086710	duplication
10	47089972	47150813	duplication
10	59209793	59211848	deletion
10	65509251	65511405	deletion
10	71280917	71291284	deletion
10	78255575	78261021	deletion
10	81474561	81502396	deletion
10	90795115	90800286	duplication
10	94134432	94137766	deletion
10	95545481	95546492	deletion
10	99034741	99037238	deletion
10	100688639	100702031	deletion
10	105053207	105054215	deletion
10	108030304	108032575	deletion
10	114112179	114116659	deletion
10	114157784	114158122	deletion
10	132635396	132638414	deletion
10	132909082	132912781	deletion
10	132988697	132991196	deletion
11	4248265	4353229	deletion
11	4264092	4309730	deletion
11	4272149	4327511	deletion
11	10260036	10261329	deletion
11	22470785	22472850	deletion
11	29967582	29968470	deletion
11	31393768	31397650	deletion
11	45429848	45431615	deletion
11	47057588	47063700	deletion
11	48600857	48604286	deletion
11	51341174	51362976	deletion
11	51346696	51348982	deletion
11	51353224	51367675	deletion
11	58166965	58168146	deletion
11	58594195	58596027	deletion
11	67642222	67644907	deletion
11	69400834	69401399	deletion
11	81856334	81862981	deletion
11	93679228	93681405	deletion
11	102751102	102752804	deletion
11	104267742	104273236	deletion
11	124775004	124778380	deletion
12	8558618	8591535	deletion
12	8568920	8587027	deletion
12	34845067	34849183	deletion
12	37991227	37994637	deletion
12	38009953	38018211	deletion
12	45903207	45909947	deletion
12	48708487	48711018	deletion
12	51216448	51218462	deletion
12	71602363	71604480	deletion
12	80153371	80162648	duplication
12	83844044	83844608	deletion
12	84593115	84596020	deletion
12	90487031	90491708	deletion
12	96010454	96012414	deletion
12	96233490	96236776	deletion
12	98669930	98672101	deletion
12	98955382	98959032	deletion
12	102102410	102107115	deletion
13	23632424	23637293	deletion
13	28268151	28269060	deletion
13	31703504	31705692	deletion
13	34192594	34193335	deletion
13	45042429	45043106	deletion
13	51069347	51075082	deletion
13	67174780	67177425	deletion
13	72477264	72480580	deletion
13	72807612	72812361	deletion
13	72843031	72846923	deletion
13	83165934	83172206	deletion
13	99254021	99258251	deletion
13	101894135	101896428	deletion
14	20550914	20555141	deletion
14	21952624	21954666	deletion
14	29728038	29728802	deletion
14	40609821	40617662	deletion
14	60341398	60343244	deletion
14	65606353	65608023	deletion
14	70687829	70689462	deletion
14	73997195	74024603	deletion
14	74011083	74024007	deletion
14	82499115	82503327	deletion
15	21902635	21929978	duplication
15	23671395	23674750	deletion
15	39372403	39373464	deletion
15	71708614	71713685	deletion
15	72385965	72388158	deletion
15	82565779	82567876	deletion
15	83551623	83557675	deletion
15	84541434	84543838	deletion
15	86057007	86059202	deletion
15	99574506	99575633	deletion
16	13294446	13296481	deletion
16	21518346	21544882	duplication
16	21541685	21569415	duplication
16	21573321	21580382	duplication
16	21588291	21593314	duplication
16	22611652	22662020	duplication
16	22623100	22783757	duplication
16	22650742	22695701	duplication
16	23047727	23049533	deletion
16	25340109	25343128	deletion
16	57326358	57328153	deletion
16	57725354	57727833	deletion
16	62544334	62550663	deletion
16	76539138	76544021	deletion
16	84501432	84504122	deletion
16	85149501	85150074	deletion
17	723720	724862	deletion
17	2719916	2721218	deletion
17	5595707	5597504	deletion
17	14189910	14191557	deletion
17	16661446	16704453	duplication
17	18359814	18376676	deletion
17	18418796	18465083	deletion
17	18421015	18422388	deletion
17	18729995	18745198	deletion
17	26780360	26783483	deletion
17	36963475	36964937	deletion
17	39421554	39432271	deletion
17	51852763	51860720	deletion
17	55089734	55092841	deletion
17	78834683	78835348	deletion
18	13143139	13144147	deletion
18	24571615	24572338	deletion
18	38259899	38266756	deletion
18	38864885	38868159	deletion
18	46979009	46979603	deletion
18	47694968	47698389	deletion
18	51952950	51956960	deletion
18	54946735	54948718	deletion
18	59672757	59674196	deletion
18	63723836	63732368	deletion
18	68383989	68387114	deletion
18	74347197	74348009	deletion
18	75266983	75268167	deletion
18	76662372	76666356	deletion
18	77309946	77312089	deletion
19	12694867	12698924	deletion
19	13775665	13776831	deletion
19	15046391	15049476	deletion
19	23140878	23142941	deletion
19	35661065	35665796	deletion
19	46278623	46279603	deletion
19	51077885	51082507	deletion
19	53422195	53424196	deletion
20	1389096	1390815	deletion
20	1560739	1593685	deletion
20	24903696	24904414	deletion
20	26297587	26302710	deletion
20	31525529	31529406	deletion
20	42271862	42274588	deletion
20	42481288	42483775	deletion
20	50759193	50760918	deletion
20	54434518	54440716	deletion
20	56079181	56080566	deletion
20	61724537	61725820	deletion
20	61724701	61725601	deletion
21	43350074	43353473	deletion
21	44970403	44973398	deletion
21	47388020	47389729	deletion
22	17770283	17779065	deletion
22	18057747	18060454	deletion
22	20950623	20953843	deletion
22	31776449	31780070	deletion
