# Supplementary material
Source: HighWire-hosted journal article supplement (https://jmg.bmj.com/content/55/11/735)
Supplement: inline-supplementary-material-15 [file inline-supplementary-material-15.xls]

## Sheet: 1X short-insert
Chr	Start	End	Type	Library	Detection	Coverage
1	180001	315000	deletion	short-insert	discordant_read_pair&read_depth	1X
1	1260001	1440000	deletion	short-insert	discordant_read_pair&read_depth	1X
1	5435001	5460000	deletion	short-insert	discordant_read_pair&read_depth	1X
1	16855001	17125000	duplication	short-insert	discordant_read_pair&read_depth	1X
1	24255001	24360000	deletion	short-insert	discordant_read_pair&read_depth	1X
1	25158598	25161534	deletion	short-insert	discordant_read_pair&read_depth	1X
1	25590001	25650000	deletion	short-insert	discordant_read_pair&read_depth	1X
1	58743812	58744814	deletion	short-insert	discordant_read_pair&read_depth	1X
1	66024118	66030265	deletion	short-insert	discordant_read_pair&read_depth	1X
1	72765001	72810000	deletion	short-insert	discordant_read_pair&read_depth	1X
1	78649137	78654154	deletion	short-insert	discordant_read_pair&read_depth	1X
1	84517910	84524635	deletion	short-insert	discordant_read_pair&read_depth	1X
1	103780001	104010000	deletion	short-insert	discordant_read_pair&read_depth	1X
1	115905001	116120000	deletion	short-insert	discordant_read_pair&read_depth	1X
1	142535001	142730000	duplication	short-insert	discordant_read_pair&read_depth	1X
1	142780001	142970000	duplication	short-insert	discordant_read_pair&read_depth	1X
1	143120001	143285000	duplication	short-insert	discordant_read_pair&read_depth	1X
1	144225001	144495000	deletion	short-insert	discordant_read_pair&read_depth	1X
1	152760001	152770000	deletion	short-insert	discordant_read_pair&read_depth	1X
1	189705001	189805000	deletion	short-insert	discordant_read_pair&read_depth	1X
1	199645001	199760000	deletion	short-insert	discordant_read_pair&read_depth	1X
1	233962205	233963614	deletion	short-insert	discordant_read_pair&read_depth	1X
1	248665001	248820000	deletion	short-insert	discordant_read_pair&read_depth	1X
1	248839526	248840953	deletion	short-insert	discordant_read_pair&read_depth	1X
2	16250001	16385000	deletion	short-insert	discordant_read_pair&read_depth	1X
2	35975001	35995000	deletion	short-insert	discordant_read_pair&read_depth	1X
2	52750001	52785000	deletion	short-insert	discordant_read_pair&read_depth	1X
2	89880001	89890000	deletion	short-insert	discordant_read_pair&read_depth	1X
2	91715001	91925000	duplication	short-insert	discordant_read_pair&read_depth	1X
2	110685001	110730000	deletion	short-insert	discordant_read_pair&read_depth	1X
2	111155001	111200000	deletion	short-insert	discordant_read_pair&read_depth	1X
2	131235001	131295000	deletion	short-insert	discordant_read_pair&read_depth	1X
2	132965001	133125000	duplication	short-insert	discordant_read_pair&read_depth	1X
2	146860001	146880000	deletion	short-insert	discordant_read_pair&read_depth	1X
2	239755001	239830000	deletion	short-insert	discordant_read_pair&read_depth	1X
2	240780001	240840000	deletion	short-insert	discordant_read_pair&read_depth	1X
2	242520001	242710000	deletion	short-insert	discordant_read_pair&read_depth	1X
3	228746	234425	deletion	short-insert	discordant_read_pair&read_depth	1X
3	33553186	33554155	deletion	short-insert	discordant_read_pair&read_depth	1X
3	46355001	46495000	deletion	short-insert	discordant_read_pair&read_depth	1X
3	67920001	68050000	deletion	short-insert	discordant_read_pair&read_depth	1X
3	75620001	75675000	deletion	short-insert	discordant_read_pair&read_depth	1X
3	76225001	76395000	deletion	short-insert	discordant_read_pair&read_depth	1X
3	120300001	120420000	deletion	short-insert	discordant_read_pair&read_depth	1X
3	129765001	129800000	deletion	short-insert	discordant_read_pair&read_depth	1X
3	162510001	162625000	deletion	short-insert	discordant_read_pair&read_depth	1X
3	194035001	194055000	deletion	short-insert	discordant_read_pair&read_depth	1X
3	195200001	195210000	deletion	short-insert	discordant_read_pair&read_depth	1X
4	10001	70000	duplication	short-insert	discordant_read_pair&read_depth	1X
4	3565001	3635000	duplication	short-insert	discordant_read_pair&read_depth	1X
4	6894773	6896128	deletion	short-insert	discordant_read_pair&read_depth	1X
4	8735001	8950000	deletion	short-insert	discordant_read_pair&read_depth	1X
4	9160001	9215000	deletion	short-insert	discordant_read_pair&read_depth	1X
4	31810001	31850000	deletion	short-insert	discordant_read_pair&read_depth	1X
4	32825001	32850000	deletion	short-insert	discordant_read_pair&read_depth	1X
4	34683508	34688567	duplication	short-insert	discordant_read_pair&read_depth	1X
4	34780001	34830000	deletion	short-insert	discordant_read_pair&read_depth	1X
4	69170001	69880000	deletion	short-insert	discordant_read_pair&read_depth	1X
4	70125001	70240000	deletion	short-insert	discordant_read_pair&read_depth	1X
4	103329520	103332191	deletion	short-insert	discordant_read_pair&read_depth	1X
4	161050001	161075000	deletion	short-insert	discordant_read_pair&read_depth	1X
4	180097869	180098623	deletion	short-insert	discordant_read_pair&read_depth	1X
4	181876747	181878327	deletion	short-insert	discordant_read_pair&read_depth	1X
4	190540001	190685000	duplication	short-insert	discordant_read_pair&read_depth	1X
5	12790001	13200000	deletion	short-insert	discordant_read_pair&read_depth	1X
5	21525001	21575000	duplication	short-insert	discordant_read_pair&read_depth	1X
5	24370460	24373475	deletion	short-insert	discordant_read_pair&read_depth	1X
5	57323437	57333815	deletion	short-insert	discordant_read_pair&read_depth	1X
5	71880001	71995000	deletion	short-insert	discordant_read_pair&read_depth	1X
5	104450001	104510000	deletion	short-insert	discordant_read_pair&read_depth	1X
5	138785001	138910000	deletion	short-insert	discordant_read_pair&read_depth	1X
5	177330001	177350000	deletion	short-insert	discordant_read_pair&read_depth	1X
5	180260001	180410000	deletion	short-insert	discordant_read_pair&read_depth	1X
6	130001	205000	deletion	short-insert	discordant_read_pair&read_depth	1X
6	205001	385000	duplication	short-insert	discordant_read_pair&read_depth	1X
6	18402054	18402879	deletion	short-insert	discordant_read_pair&read_depth	1X
6	23734663	23758707	duplication	short-insert	discordant_read_pair&read_depth	1X
6	57205001	57620000	duplication	short-insert	discordant_read_pair&read_depth	1X
6	67010001	67045000	deletion	short-insert	discordant_read_pair&read_depth	1X
6	78965001	79040000	deletion	short-insert	discordant_read_pair&read_depth	1X
6	85318137	85324228	deletion	short-insert	discordant_read_pair&read_depth	1X
6	100034461	100035318	deletion	short-insert	discordant_read_pair&read_depth	1X
6	115240001	115585000	deletion	short-insert	discordant_read_pair&read_depth	1X
6	119150001	119200000	deletion	short-insert	discordant_read_pair&read_depth	1X
6	157470001	158075000	deletion	short-insert	discordant_read_pair&read_depth	1X
6	167835001	168295000	deletion	short-insert	discordant_read_pair&read_depth	1X
7	235001	670000	deletion	short-insert	discordant_read_pair&read_depth	1X
7	48200001	48235000	deletion	short-insert	discordant_read_pair&read_depth	1X
7	57605001	57715000	duplication	short-insert	discordant_read_pair&read_depth	1X
7	57875001	58000000	duplication	short-insert	discordant_read_pair&read_depth	1X
7	64955001	65060000	duplication	short-insert	discordant_read_pair&read_depth	1X
7	74610001	74910000	deletion	short-insert	discordant_read_pair&read_depth	1X
7	101285001	101330000	deletion	short-insert	discordant_read_pair&read_depth	1X
7	102120001	102320000	duplication	short-insert	discordant_read_pair&read_depth	1X
7	143895001	144070000	duplication	short-insert	discordant_read_pair&read_depth	1X
7	155105001	155125000	deletion	short-insert	discordant_read_pair&read_depth	1X
8	7045001	7085000	deletion	short-insert	discordant_read_pair&read_depth	1X
8	11895001	11975000	deletion	short-insert	discordant_read_pair&read_depth	1X
8	12085001	12250000	deletion	short-insert	discordant_read_pair&read_depth	1X
8	16285001	16335000	deletion	short-insert	discordant_read_pair&read_depth	1X
8	18454624	18456034	deletion	short-insert	discordant_read_pair&read_depth	1X
8	21620001	21660000	deletion	short-insert	discordant_read_pair&read_depth	1X
8	30603966	30605637	deletion	short-insert	discordant_read_pair&read_depth	1X
8	39230001	39390000	deletion	short-insert	discordant_read_pair&read_depth	1X
8	48130001	48145000	deletion	short-insert	discordant_read_pair&read_depth	1X
8	71583574	71584747	deletion	short-insert	discordant_read_pair&read_depth	1X
8	85910001	85975000	deletion	short-insert	discordant_read_pair&read_depth	1X
8	86725001	86840000	duplication	short-insert	discordant_read_pair&read_depth	1X
8	144010001	144035000	deletion	short-insert	discordant_read_pair&read_depth	1X
8	145290001	145500000	deletion	short-insert	discordant_read_pair&read_depth	1X
8	146057007	146057879	deletion	short-insert	discordant_read_pair&read_depth	1X
9	38965001	39185000	duplication	short-insert	discordant_read_pair&read_depth	1X
9	41020001	41215000	deletion	short-insert	discordant_read_pair&read_depth	1X
9	41280001	41505000	deletion	short-insert	discordant_read_pair&read_depth	1X
9	43610001	43625000	deletion	short-insert	discordant_read_pair&read_depth	1X
9	43925001	44060000	deletion	short-insert	discordant_read_pair&read_depth	1X
9	44455001	44730000	deletion	short-insert	discordant_read_pair&read_depth	1X
9	44730001	44880000	duplication	short-insert	discordant_read_pair&read_depth	1X
9	45770001	45900000	deletion	short-insert	discordant_read_pair&read_depth	1X
9	66055001	66245000	deletion	short-insert	discordant_read_pair&read_depth	1X
9	66345001	66455000	deletion	short-insert	discordant_read_pair&read_depth	1X
9	68350001	68495000	duplication	short-insert	discordant_read_pair&read_depth	1X
9	68990001	69085000	duplication	short-insert	discordant_read_pair&read_depth	1X
9	70570001	70700000	duplication	short-insert	discordant_read_pair&read_depth	1X
9	70840001	70945000	duplication	short-insert	discordant_read_pair&read_depth	1X
9	110537472	110540655	deletion	short-insert	discordant_read_pair&read_depth	1X
9	131700920	131702216	deletion	short-insert	discordant_read_pair&read_depth	1X
10	38870001	39155000	duplication	short-insert	discordant_read_pair&read_depth	1X
10	42605001	42685000	duplication	short-insert	discordant_read_pair&read_depth	1X
10	46955001	47150000	duplication	short-insert	discordant_read_pair&read_depth	1X
10	51635001	51720000	deletion	short-insert	discordant_read_pair&read_depth	1X
10	51835001	52000000	deletion	short-insert	discordant_read_pair&read_depth	1X
11	3275001	3365000	deletion	short-insert	discordant_read_pair&read_depth	1X
11	4240001	4320000	deletion	short-insert	discordant_read_pair&read_depth	1X
11	55360001	55455000	deletion	short-insert	discordant_read_pair&read_depth	1X
11	69700001	69820000	deletion	short-insert	discordant_read_pair&read_depth	1X
11	116685001	116720000	deletion	short-insert	discordant_read_pair&read_depth	1X
12	8560001	8590000	deletion	short-insert	discordant_read_pair&read_depth	1X
12	9630001	9735000	deletion	short-insert	discordant_read_pair&read_depth	1X
12	133495001	133680000	deletion	short-insert	discordant_read_pair&read_depth	1X
12	133780001	133820000	deletion	short-insert	discordant_read_pair&read_depth	1X
14	19000001	19130000	duplication	short-insert	discordant_read_pair&read_depth	1X
15	20390001	20580000	duplication	short-insert	discordant_read_pair&read_depth	1X
15	20630001	20845000	deletion	short-insert	discordant_read_pair&read_depth	1X
15	23515001	23640000	deletion	short-insert	discordant_read_pair&read_depth	1X
15	29095001	29230000	deletion	short-insert	discordant_read_pair&read_depth	1X
15	76885001	76895000	deletion	short-insert	discordant_read_pair&read_depth	1X
16	21515001	21595000	duplication	short-insert	discordant_read_pair&read_depth	1X
16	22520001	22710000	duplication	short-insert	discordant_read_pair&read_depth	1X
16	29710001	29820000	deletion	short-insert	discordant_read_pair&read_depth	1X
16	34465001	34765000	duplication	short-insert	discordant_read_pair&read_depth	1X
17	21175001	21255000	duplication	short-insert	discordant_read_pair&read_depth	1X
17	34465001	34735000	deletion	short-insert	discordant_read_pair&read_depth	1X
17	36350001	36400000	deletion	short-insert	discordant_read_pair&read_depth	1X
17	39100001	39285000	deletion	short-insert	discordant_read_pair&read_depth	1X
17	41345001	41420000	deletion	short-insert	discordant_read_pair&read_depth	1X
17	43390001	43485000	deletion	short-insert	discordant_read_pair&read_depth	1X
17	66000001	66115000	deletion	short-insert	discordant_read_pair&read_depth	1X
17	77460001	77630000	deletion	short-insert	discordant_read_pair&read_depth	1X
17	81045001	81200000	deletion	short-insert	discordant_read_pair&read_depth	1X
18	41031554	41032526	deletion	short-insert	discordant_read_pair&read_depth	1X
18	74347173	74348014	deletion	short-insert	discordant_read_pair&read_depth	1X
19	7285001	7395000	deletion	short-insert	discordant_read_pair&read_depth	1X
19	20505001	20720000	deletion	short-insert	discordant_read_pair&read_depth	1X
19	46278665	46279761	deletion	short-insert	discordant_read_pair&read_depth	1X
19	48405001	48460000	duplication	short-insert	discordant_read_pair&read_depth	1X
19	55230001	55265000	deletion	short-insert	discordant_read_pair&read_depth	1X
19	55280001	55375000	deletion	short-insert	discordant_read_pair&read_depth	1X
20	26045001	26150000	duplication	short-insert	discordant_read_pair&read_depth	1X
20	29420001	29490000	duplication	short-insert	discordant_read_pair&read_depth	1X
20	54434623	54440630	deletion	short-insert	discordant_read_pair&read_depth	1X
21	11020001	11185000	duplication	short-insert	discordant_read_pair&read_depth	1X
21	14340001	14445000	duplication	short-insert	discordant_read_pair&read_depth	1X
21	14960001	15205000	deletion	short-insert	discordant_read_pair&read_depth	1X
22	16850001	16960000	duplication	short-insert	discordant_read_pair&read_depth	1X
22	17240001	17275000	deletion	short-insert	discordant_read_pair&read_depth	1X
22	18765001	18890000	duplication	short-insert	discordant_read_pair&read_depth	1X
22	21525001	21660000	duplication	short-insert	discordant_read_pair&read_depth	1X
22	22330001	23255000	deletion	short-insert	discordant_read_pair&read_depth	1X
22	27168084	27169813	deletion	short-insert	discordant_read_pair&read_depth	1X
22	28220001	28255000	deletion	short-insert	discordant_read_pair&read_depth	1X
22	36087941	36094354	deletion	short-insert	discordant_read_pair&read_depth	1X
X	3680001	3960000	deletion	short-insert	discordant_read_pair&read_depth	1X
X	76230001	76540000	deletion	short-insert	discordant_read_pair&read_depth	1X
X	76655001	77440000	deletion	short-insert	discordant_read_pair&read_depth	1X
X	81042428	81043125	deletion	short-insert	discordant_read_pair&read_depth	1X
X	120010001	120120000	deletion	short-insert	discordant_read_pair&read_depth	1X
X	152230001	152360000	deletion	short-insert	discordant_read_pair&read_depth	1X

## Sheet: 3X short-insert
Chr	Start	End	Type	Library	Detection	Coverage
1	45001	95000	deletion	short-insert	discordant_read_pair&read_depth	3X
1	180001	315000	deletion	short-insert	discordant_read_pair&read_depth	3X
1	1260001	1445000	deletion	short-insert	discordant_read_pair&read_depth	3X
1	5435001	5460000	deletion	short-insert	discordant_read_pair&read_depth	3X
1	11051426	11054605	duplication	short-insert	discordant_read_pair&read_depth	3X
1	16830001	17125000	duplication	short-insert	discordant_read_pair&read_depth	3X
1	24255001	24365000	deletion	short-insert	discordant_read_pair&read_depth	3X
1	25158598	25161534	deletion	short-insert	discordant_read_pair&read_depth	3X
1	25595001	25660000	deletion	short-insert	discordant_read_pair&read_depth	3X
1	43475001	43525000	deletion	short-insert	discordant_read_pair&read_depth	3X
1	56831106	56835039	deletion	short-insert	discordant_read_pair&read_depth	3X
1	58743812	58744814	deletion	short-insert	discordant_read_pair&read_depth	3X
1	60048632	60049675	deletion	short-insert	discordant_read_pair&read_depth	3X
1	66024186	66030265	deletion	short-insert	discordant_read_pair&read_depth	3X
1	68007911	68008836	deletion	short-insert	discordant_read_pair&read_depth	3X
1	72765001	72810000	deletion	short-insert	discordant_read_pair&read_depth	3X
1	78649137	78654154	deletion	short-insert	discordant_read_pair&read_depth	3X
1	84517910	84524635	deletion	short-insert	discordant_read_pair&read_depth	3X
1	103785001	104005000	deletion	short-insert	discordant_read_pair&read_depth	3X
1	104070001	104095000	deletion	short-insert	discordant_read_pair&read_depth	3X
1	109535001	109705000	deletion	short-insert	discordant_read_pair&read_depth	3X
1	109573176	109575207	deletion	short-insert	discordant_read_pair&read_depth	3X
1	110187199	110191461	deletion	short-insert	discordant_read_pair&read_depth	3X
1	110225001	110245000	deletion	short-insert	discordant_read_pair&read_depth	3X
1	115905001	116120000	deletion	short-insert	discordant_read_pair&read_depth	3X
1	142535001	142730000	duplication	short-insert	discordant_read_pair&read_depth	3X
1	142780001	142970000	duplication	short-insert	discordant_read_pair&read_depth	3X
1	143120001	143285000	duplication	short-insert	discordant_read_pair&read_depth	3X
1	144345001	144495000	deletion	short-insert	discordant_read_pair&read_depth	3X
1	152555518	152587783	deletion	short-insert	discordant_read_pair&read_depth	3X
1	152760001	152770000	deletion	short-insert	discordant_read_pair&read_depth	3X
1	156526702	156528972	deletion	short-insert	discordant_read_pair&read_depth	3X
1	159648617	159649680	deletion	short-insert	discordant_read_pair&read_depth	3X
1	168024419	168025761	deletion	short-insert	discordant_read_pair&read_depth	3X
1	184814738	184820851	deletion	short-insert	discordant_read_pair&read_depth	3X
1	187716101	187722551	deletion	short-insert	discordant_read_pair&read_depth	3X
1	188539337	188540288	deletion	short-insert	discordant_read_pair&read_depth	3X
1	189705001	189780000	deletion	short-insert	discordant_read_pair&read_depth	3X
1	199645001	199760000	deletion	short-insert	discordant_read_pair&read_depth	3X
1	207542031	207545597	deletion	short-insert	discordant_read_pair&read_depth	3X
1	218182456	218188714	deletion	short-insert	discordant_read_pair&read_depth	3X
1	229235001	229260000	deletion	short-insert	discordant_read_pair&read_depth	3X
1	229812511	229820900	deletion	short-insert	discordant_read_pair&read_depth	3X
1	233962205	233963614	deletion	short-insert	discordant_read_pair&read_depth	3X
1	235537071	235538425	deletion	short-insert	discordant_read_pair&read_depth	3X
1	236549034	236551338	deletion	short-insert	discordant_read_pair&read_depth	3X
1	248675001	248820000	deletion	short-insert	discordant_read_pair&read_depth	3X
1	248839526	248840953	deletion	short-insert	discordant_read_pair&read_depth	3X
2	4781197	4787354	deletion	short-insert	discordant_read_pair&read_depth	3X
2	19190001	19225000	deletion	short-insert	discordant_read_pair&read_depth	3X
2	34695001	34735000	deletion	short-insert	discordant_read_pair&read_depth	3X
2	35975001	35995000	deletion	short-insert	discordant_read_pair&read_depth	3X
2	42346262	42347312	deletion	short-insert	discordant_read_pair&read_depth	3X
2	52749606	52785289	deletion	short-insert	discordant_read_pair&read_depth	3X
2	54565457	54567509	deletion	short-insert	discordant_read_pair&read_depth	3X
2	76526464	76528970	deletion	short-insert	discordant_read_pair&read_depth	3X
2	76773548	76775472	deletion	short-insert	discordant_read_pair&read_depth	3X
2	79076559	79081208	deletion	short-insert	discordant_read_pair&read_depth	3X
2	87570001	87660000	duplication	short-insert	discordant_read_pair&read_depth	3X
2	89880001	89890000	deletion	short-insert	discordant_read_pair&read_depth	3X
2	91705001	91925000	duplication	short-insert	discordant_read_pair&read_depth	3X
2	91970001	92110000	duplication	short-insert	discordant_read_pair&read_depth	3X
2	98140001	98165000	deletion	short-insert	discordant_read_pair&read_depth	3X
2	110685001	110730000	deletion	short-insert	discordant_read_pair&read_depth	3X
2	110990001	111025000	deletion	short-insert	discordant_read_pair&read_depth	3X
2	111155001	111200000	deletion	short-insert	discordant_read_pair&read_depth	3X
2	127674735	127677273	deletion	short-insert	discordant_read_pair&read_depth	3X
2	132995001	133125000	duplication	short-insert	discordant_read_pair&read_depth	3X
2	146860001	146880000	deletion	short-insert	discordant_read_pair&read_depth	3X
2	155820001	155830000	deletion	short-insert	discordant_read_pair&read_depth	3X
2	160149116	160151654	deletion	short-insert	discordant_read_pair&read_depth	3X
2	180065001	180080000	deletion	short-insert	discordant_read_pair&read_depth	3X
2	194690001	194700000	deletion	short-insert	discordant_read_pair&read_depth	3X
2	223760131	223762686	deletion	short-insert	discordant_read_pair&read_depth	3X
2	239755001	239785000	deletion	short-insert	discordant_read_pair&read_depth	3X
2	242520001	242710000	deletion	short-insert	discordant_read_pair&read_depth	3X
3	228760	234404	deletion	short-insert	discordant_read_pair&read_depth	3X
3	22092370	22097945	deletion	short-insert	discordant_read_pair&read_depth	3X
3	26450972	26452321	deletion	short-insert	discordant_read_pair&read_depth	3X
3	33553186	33554155	deletion	short-insert	discordant_read_pair&read_depth	3X
3	46355001	46495000	deletion	short-insert	discordant_read_pair&read_depth	3X
3	65190001	65215000	deletion	short-insert	discordant_read_pair&read_depth	3X
3	67925001	68060000	deletion	short-insert	discordant_read_pair&read_depth	3X
3	75620001	75680000	deletion	short-insert	discordant_read_pair&read_depth	3X
3	76225001	76400000	deletion	short-insert	discordant_read_pair&read_depth	3X
3	83853013	83855389	deletion	short-insert	discordant_read_pair&read_depth	3X
3	95465724	95470804	deletion	short-insert	discordant_read_pair&read_depth	3X
3	120300001	120420000	deletion	short-insert	discordant_read_pair&read_depth	3X
3	124936223	124937195	deletion	short-insert	discordant_read_pair&read_depth	3X
3	129765001	129800000	deletion	short-insert	discordant_read_pair&read_depth	3X
3	146385161	146394872	deletion	short-insert	discordant_read_pair&read_depth	3X
3	162510001	162625000	deletion	short-insert	discordant_read_pair&read_depth	3X
3	162715001	162725000	deletion	short-insert	discordant_read_pair&read_depth	3X
3	186581012	186585304	deletion	short-insert	discordant_read_pair&read_depth	3X
3	187732857	187734833	deletion	short-insert	discordant_read_pair&read_depth	3X
3	194035001	194055000	deletion	short-insert	discordant_read_pair&read_depth	3X
3	194398697	194400290	deletion	short-insert	discordant_read_pair&read_depth	3X
3	195200001	195210000	deletion	short-insert	discordant_read_pair&read_depth	3X
4	15001	70000	duplication	short-insert	discordant_read_pair&read_depth	3X
4	4120001	4155000	deletion	short-insert	discordant_read_pair&read_depth	3X
4	6651571	6652926	deletion	short-insert	discordant_read_pair&read_depth	3X
4	6894773	6896128	deletion	short-insert	discordant_read_pair&read_depth	3X
4	8735001	8945000	deletion	short-insert	discordant_read_pair&read_depth	3X
4	9160001	9215000	deletion	short-insert	discordant_read_pair&read_depth	3X
4	9455001	9485000	deletion	short-insert	discordant_read_pair&read_depth	3X
4	10211107	10234670	deletion	short-insert	discordant_read_pair&read_depth	3X
4	21160963	21167126	deletion	short-insert	discordant_read_pair&read_depth	3X
4	31815001	31850000	deletion	short-insert	discordant_read_pair&read_depth	3X
4	32825001	32850000	deletion	short-insert	discordant_read_pair&read_depth	3X
4	34683508	34688567	duplication	short-insert	discordant_read_pair&read_depth	3X
4	34779930	34829029	deletion	short-insert	discordant_read_pair&read_depth	3X
4	69170001	69880000	deletion	short-insert	discordant_read_pair&read_depth	3X
4	70125001	70235000	deletion	short-insert	discordant_read_pair&read_depth	3X
4	75280001	75325000	deletion	short-insert	discordant_read_pair&read_depth	3X
4	75642688	75648902	deletion	short-insert	discordant_read_pair&read_depth	3X
4	80888042	80894157	deletion	short-insert	discordant_read_pair&read_depth	3X
4	86976362	86980132	deletion	short-insert	discordant_read_pair&read_depth	3X
4	103329520	103332191	deletion	short-insert	discordant_read_pair&read_depth	3X
4	107437757	107438521	deletion	short-insert	discordant_read_pair&read_depth	3X
4	116166886	116177216	deletion	short-insert	discordant_read_pair&read_depth	3X
4	133180741	133183069	deletion	short-insert	discordant_read_pair&read_depth	3X
4	161045001	161075000	deletion	short-insert	discordant_read_pair&read_depth	3X
4	167575001	167590000	deletion	short-insert	discordant_read_pair&read_depth	3X
4	173425001	173435000	deletion	short-insert	discordant_read_pair&read_depth	3X
4	180097869	180098623	deletion	short-insert	discordant_read_pair&read_depth	3X
4	181876747	181878295	deletion	short-insert	discordant_read_pair&read_depth	3X
4	186441638	186444103	deletion	short-insert	discordant_read_pair&read_depth	3X
4	187880001	187895000	deletion	short-insert	discordant_read_pair&read_depth	3X
4	190540001	190685000	duplication	short-insert	discordant_read_pair&read_depth	3X
4	190662841	190663721	deletion	short-insert	discordant_read_pair&read_depth	3X
5	1178257	1180761	deletion	short-insert	discordant_read_pair&read_depth	3X
5	12790001	13200000	deletion	short-insert	discordant_read_pair&read_depth	3X
5	17712883	17715847	duplication	short-insert	discordant_read_pair&read_depth	3X
5	21525001	21575000	duplication	short-insert	discordant_read_pair&read_depth	3X
5	24370546	24373475	deletion	short-insert	discordant_read_pair&read_depth	3X
5	57323437	57333815	deletion	short-insert	discordant_read_pair&read_depth	3X
5	57679932	57686094	deletion	short-insert	discordant_read_pair&read_depth	3X
5	60001708	60003700	deletion	short-insert	discordant_read_pair&read_depth	3X
5	69215001	69290000	deletion	short-insert	discordant_read_pair&read_depth	3X
5	69410001	69455000	deletion	short-insert	discordant_read_pair&read_depth	3X
5	71890001	71995000	deletion	short-insert	discordant_read_pair&read_depth	3X
5	79049596	79051847	duplication	short-insert	discordant_read_pair&read_depth	3X
5	104430001	104500000	deletion	short-insert	discordant_read_pair&read_depth	3X
5	119380125	119382685	deletion	short-insert	discordant_read_pair&read_depth	3X
5	125496700	125498763	deletion	short-insert	discordant_read_pair&read_depth	3X
5	135115180	135120759	deletion	short-insert	discordant_read_pair&read_depth	3X
5	138785001	138910000	deletion	short-insert	discordant_read_pair&read_depth	3X
5	177225001	177240000	deletion	short-insert	discordant_read_pair&read_depth	3X
5	177330001	177350000	deletion	short-insert	discordant_read_pair&read_depth	3X
5	180260001	180405000	deletion	short-insert	discordant_read_pair&read_depth	3X
6	125001	205000	deletion	short-insert	discordant_read_pair&read_depth	3X
6	260001	385000	duplication	short-insert	discordant_read_pair&read_depth	3X
6	10264445	10265311	deletion	short-insert	discordant_read_pair&read_depth	3X
6	13882493	13883923	deletion	short-insert	discordant_read_pair&read_depth	3X
6	18402054	18402879	deletion	short-insert	discordant_read_pair&read_depth	3X
6	23734663	23758707	duplication	short-insert	discordant_read_pair&read_depth	3X
6	32561917	32564666	deletion	short-insert	discordant_read_pair&read_depth	3X
6	35754577	35766762	duplication	short-insert	discordant_read_pair&read_depth	3X
6	55825959	55846753	deletion	short-insert	discordant_read_pair&read_depth	3X
6	57205001	57610000	duplication	short-insert	discordant_read_pair&read_depth	3X
6	57423044	57429152	deletion	short-insert	discordant_read_pair&read_depth	3X
6	57478134	57478854	deletion	short-insert	discordant_read_pair&read_depth	3X
6	64666975	64668544	deletion	short-insert	discordant_read_pair&read_depth	3X
6	67010001	67050000	deletion	short-insert	discordant_read_pair&read_depth	3X
6	74613549	74620369	deletion	short-insert	discordant_read_pair&read_depth	3X
6	78965001	79035000	deletion	short-insert	discordant_read_pair&read_depth	3X
6	85318137	85324228	deletion	short-insert	discordant_read_pair&read_depth	3X
6	86708675	86714805	deletion	short-insert	discordant_read_pair&read_depth	3X
6	100034461	100035318	deletion	short-insert	discordant_read_pair&read_depth	3X
6	103740001	103765000	deletion	short-insert	discordant_read_pair&read_depth	3X
6	115240001	115575000	deletion	short-insert	discordant_read_pair&read_depth	3X
6	132707405	132712510	deletion	short-insert	discordant_read_pair&read_depth	3X
6	151485813	151486951	deletion	short-insert	discordant_read_pair&read_depth	3X
6	153029975	153033831	deletion	short-insert	discordant_read_pair&read_depth	3X
6	157470001	158070000	deletion	short-insert	discordant_read_pair&read_depth	3X
6	161035001	161065000	duplication	short-insert	discordant_read_pair&read_depth	3X
6	167835001	168295000	deletion	short-insert	discordant_read_pair&read_depth	3X
6	171005001	171120000	deletion	short-insert	discordant_read_pair&read_depth	3X
7	235001	670000	deletion	short-insert	discordant_read_pair&read_depth	3X
7	28574298	28575154	deletion	short-insert	discordant_read_pair&read_depth	3X
7	31315503	31319005	deletion	short-insert	discordant_read_pair&read_depth	3X
7	32390127	32393113	deletion	short-insert	discordant_read_pair&read_depth	3X
7	47708755	47709518	duplication	short-insert	discordant_read_pair&read_depth	3X
7	48200001	48235000	deletion	short-insert	discordant_read_pair&read_depth	3X
7	55286762	55289153	deletion	short-insert	discordant_read_pair&read_depth	3X
7	56217724	56220357	deletion	short-insert	discordant_read_pair&read_depth	3X
7	57605001	57775000	duplication	short-insert	discordant_read_pair&read_depth	3X
7	64950001	65060000	duplication	short-insert	discordant_read_pair&read_depth	3X
7	73828499	73831369	deletion	short-insert	discordant_read_pair&read_depth	3X
7	74615001	74910000	deletion	short-insert	discordant_read_pair&read_depth	3X
7	81441582	81442506	deletion	short-insert	discordant_read_pair&read_depth	3X
7	93416924	93423057	deletion	short-insert	discordant_read_pair&read_depth	3X
7	96475801	96482008	deletion	short-insert	discordant_read_pair&read_depth	3X
7	101001174	101005617	deletion	short-insert	discordant_read_pair&read_depth	3X
7	101290001	101330000	deletion	short-insert	discordant_read_pair&read_depth	3X
7	102125001	102320000	duplication	short-insert	discordant_read_pair&read_depth	3X
7	127214948	127217993	deletion	short-insert	discordant_read_pair&read_depth	3X
7	141765001	141795000	deletion	short-insert	discordant_read_pair&read_depth	3X
7	143295001	143425000	deletion	short-insert	discordant_read_pair&read_depth	3X
7	143875001	144075000	duplication	short-insert	discordant_read_pair&read_depth	3X
7	155105001	155125000	deletion	short-insert	discordant_read_pair&read_depth	3X
7	158930001	159040000	deletion	short-insert	discordant_read_pair&read_depth	3X
8	1340001	1355000	deletion	short-insert	discordant_read_pair&read_depth	3X
8	4122870	4124981	deletion	short-insert	discordant_read_pair&read_depth	3X
8	7045001	7110000	deletion	short-insert	discordant_read_pair&read_depth	3X
8	11895001	11980000	deletion	short-insert	discordant_read_pair&read_depth	3X
8	12085001	12250000	deletion	short-insert	discordant_read_pair&read_depth	3X
8	12345001	12455000	duplication	short-insert	discordant_read_pair&read_depth	3X
8	16275001	16335000	deletion	short-insert	discordant_read_pair&read_depth	3X
8	18454628	18455960	deletion	short-insert	discordant_read_pair&read_depth	3X
8	21620001	21665000	deletion	short-insert	discordant_read_pair&read_depth	3X
8	30603966	30605637	deletion	short-insert	discordant_read_pair&read_depth	3X
8	39230001	39385000	deletion	short-insert	discordant_read_pair&read_depth	3X
8	48130001	48145000	deletion	short-insert	discordant_read_pair&read_depth	3X
8	49093337	49094025	deletion	short-insert	discordant_read_pair&read_depth	3X
8	62035341	62036015	deletion	short-insert	discordant_read_pair&read_depth	3X
8	71583574	71584747	deletion	short-insert	discordant_read_pair&read_depth	3X
8	85910001	86005000	deletion	short-insert	discordant_read_pair&read_depth	3X
8	86725001	86840000	duplication	short-insert	discordant_read_pair&read_depth	3X
8	103994744	103996664	deletion	short-insert	discordant_read_pair&read_depth	3X
8	129465158	129471310	deletion	short-insert	discordant_read_pair&read_depth	3X
8	144010001	144035000	deletion	short-insert	discordant_read_pair&read_depth	3X
8	145185001	145215000	deletion	short-insert	discordant_read_pair&read_depth	3X
8	145290001	145500000	deletion	short-insert	discordant_read_pair&read_depth	3X
8	146057007	146057862	deletion	short-insert	discordant_read_pair&read_depth	3X
9	22495001	22505000	deletion	short-insert	discordant_read_pair&read_depth	3X
9	23362750	23377696	deletion	short-insert	discordant_read_pair&read_depth	3X
9	31291263	31292665	deletion	short-insert	discordant_read_pair&read_depth	3X
9	36362913	36364132	deletion	short-insert	discordant_read_pair&read_depth	3X
9	39030001	39185000	duplication	short-insert	discordant_read_pair&read_depth	3X
9	41020001	41215000	deletion	short-insert	discordant_read_pair&read_depth	3X
9	42145001	42215000	duplication	short-insert	discordant_read_pair&read_depth	3X
9	42460001	42560000	duplication	short-insert	discordant_read_pair&read_depth	3X
9	43610001	43625000	deletion	short-insert	discordant_read_pair&read_depth	3X
9	43925001	44055000	deletion	short-insert	discordant_read_pair&read_depth	3X
9	44245001	44280000	deletion	short-insert	discordant_read_pair&read_depth	3X
9	44450001	44730000	deletion	short-insert	discordant_read_pair&read_depth	3X
9	45350001	45480000	duplication	short-insert	discordant_read_pair&read_depth	3X
9	45575001	45735000	duplication	short-insert	discordant_read_pair&read_depth	3X
9	46080001	46120000	deletion	short-insert	discordant_read_pair&read_depth	3X
9	46390001	46420000	deletion	short-insert	discordant_read_pair&read_depth	3X
9	66045001	66245000	deletion	short-insert	discordant_read_pair&read_depth	3X
9	66345001	66455000	deletion	short-insert	discordant_read_pair&read_depth	3X
9	67825001	67895000	duplication	short-insert	discordant_read_pair&read_depth	3X
9	68340001	68505000	duplication	short-insert	discordant_read_pair&read_depth	3X
9	68985001	69195000	duplication	short-insert	discordant_read_pair&read_depth	3X
9	69345001	69575000	duplication	short-insert	discordant_read_pair&read_depth	3X
9	70575001	70720000	duplication	short-insert	discordant_read_pair&read_depth	3X
9	71738063	71743376	deletion	short-insert	discordant_read_pair&read_depth	3X
9	83967932	83970675	deletion	short-insert	discordant_read_pair&read_depth	3X
9	89154541	89155946	deletion	short-insert	discordant_read_pair&read_depth	3X
9	101308998	101311659	deletion	short-insert	discordant_read_pair&read_depth	3X
9	110033414	110035533	deletion	short-insert	discordant_read_pair&read_depth	3X
9	110537488	110540654	deletion	short-insert	discordant_read_pair&read_depth	3X
9	131700920	131702110	deletion	short-insert	discordant_read_pair&read_depth	3X
9	136415001	136455000	deletion	short-insert	discordant_read_pair&read_depth	3X
9	138925001	138950000	deletion	short-insert	discordant_read_pair&read_depth	3X
10	4290068	4291699	deletion	short-insert	discordant_read_pair&read_depth	3X
10	6097298	6097945	deletion	short-insert	discordant_read_pair&read_depth	3X
10	24376767	24378467	deletion	short-insert	discordant_read_pair&read_depth	3X
10	38870001	39000000	duplication	short-insert	discordant_read_pair&read_depth	3X
10	42605001	42820000	duplication	short-insert	discordant_read_pair&read_depth	3X
10	46695001	46945000	deletion	short-insert	discordant_read_pair&read_depth	3X
10	46945001	47150000	duplication	short-insert	discordant_read_pair&read_depth	3X
10	51135001	51360000	deletion	short-insert	discordant_read_pair&read_depth	3X
10	51635001	51720000	deletion	short-insert	discordant_read_pair&read_depth	3X
10	51835001	52000000	deletion	short-insert	discordant_read_pair&read_depth	3X
10	59209793	59211887	deletion	short-insert	discordant_read_pair&read_depth	3X
10	78255535	78261039	deletion	short-insert	discordant_read_pair&read_depth	3X
10	81475001	81505000	deletion	short-insert	discordant_read_pair&read_depth	3X
10	108030304	108032598	deletion	short-insert	discordant_read_pair&read_depth	3X
10	111572111	111578255	deletion	short-insert	discordant_read_pair&read_depth	3X
10	114110001	114120000	deletion	short-insert	discordant_read_pair&read_depth	3X
10	122226705	122228842	deletion	short-insert	discordant_read_pair&read_depth	3X
11	3270001	3360000	deletion	short-insert	discordant_read_pair&read_depth	3X
11	4250001	4310000	deletion	short-insert	discordant_read_pair&read_depth	3X
11	29005001	29015000	deletion	short-insert	discordant_read_pair&read_depth	3X
11	45429834	45431637	deletion	short-insert	discordant_read_pair&read_depth	3X
11	47057568	47063740	deletion	short-insert	discordant_read_pair&read_depth	3X
11	48340001	48390000	duplication	short-insert	discordant_read_pair&read_depth	3X
11	55365001	55455000	deletion	short-insert	discordant_read_pair&read_depth	3X
11	60975001	61015000	deletion	short-insert	discordant_read_pair&read_depth	3X
11	63698853	63701656	deletion	short-insert	discordant_read_pair&read_depth	3X
11	69400744	69401450	deletion	short-insert	discordant_read_pair&read_depth	3X
11	69700001	69815000	deletion	short-insert	discordant_read_pair&read_depth	3X
11	95169367	95175421	deletion	short-insert	discordant_read_pair&read_depth	3X
11	116680001	116720000	deletion	short-insert	discordant_read_pair&read_depth	3X
12	8560001	8590000	deletion	short-insert	discordant_read_pair&read_depth	3X
12	9580001	9735000	deletion	short-insert	discordant_read_pair&read_depth	3X
12	11505001	11545000	deletion	short-insert	discordant_read_pair&read_depth	3X
12	22570001	22590000	deletion	short-insert	discordant_read_pair&read_depth	3X
12	45902992	45909964	deletion	short-insert	discordant_read_pair&read_depth	3X
12	76505001	76520000	deletion	short-insert	discordant_read_pair&read_depth	3X
12	80154931	80162723	duplication	short-insert	discordant_read_pair&read_depth	3X
12	99793849	99802764	deletion	short-insert	discordant_read_pair&read_depth	3X
12	100288341	100291834	deletion	short-insert	discordant_read_pair&read_depth	3X
12	133505001	133680000	deletion	short-insert	discordant_read_pair&read_depth	3X
12	133780001	133820000	deletion	short-insert	discordant_read_pair&read_depth	3X
13	28268118	28269054	deletion	short-insert	discordant_read_pair&read_depth	3X
13	101894125	101896502	deletion	short-insert	discordant_read_pair&read_depth	3X
14	19000001	19125000	duplication	short-insert	discordant_read_pair&read_depth	3X
14	19370001	19455000	duplication	short-insert	discordant_read_pair&read_depth	3X
14	40609801	40617677	deletion	short-insert	discordant_read_pair&read_depth	3X
14	74000001	74025000	deletion	short-insert	discordant_read_pair&read_depth	3X
14	105576620	105579633	deletion	short-insert	discordant_read_pair&read_depth	3X
15	20000001	20090000	duplication	short-insert	discordant_read_pair&read_depth	3X
15	20390001	20580000	duplication	short-insert	discordant_read_pair&read_depth	3X
15	21900001	21940000	duplication	short-insert	discordant_read_pair&read_depth	3X
15	22175001	22295000	deletion	short-insert	discordant_read_pair&read_depth	3X
15	22710001	22730000	deletion	short-insert	discordant_read_pair&read_depth	3X
15	23510001	23640000	deletion	short-insert	discordant_read_pair&read_depth	3X
15	27135001	27180000	deletion	short-insert	discordant_read_pair&read_depth	3X
15	27585001	27595000	deletion	short-insert	discordant_read_pair&read_depth	3X
15	28560001	28825000	deletion	short-insert	discordant_read_pair&read_depth	3X
15	29100001	29210000	deletion	short-insert	discordant_read_pair&read_depth	3X
15	30510001	30730000	deletion	short-insert	discordant_read_pair&read_depth	3X
15	39372349	39373552	deletion	short-insert	discordant_read_pair&read_depth	3X
15	72385992	72388297	deletion	short-insert	discordant_read_pair&read_depth	3X
15	76885001	76900000	deletion	short-insert	discordant_read_pair&read_depth	3X
15	85775001	85785000	deletion	short-insert	discordant_read_pair&read_depth	3X
15	98842330	98843885	deletion	short-insert	discordant_read_pair&read_depth	3X
15	99574439	99575644	deletion	short-insert	discordant_read_pair&read_depth	3X
16	1422843	1424162	deletion	short-insert	discordant_read_pair&read_depth	3X
16	14990001	15125000	duplication	short-insert	discordant_read_pair&read_depth	3X
16	19945525	19967597	deletion	short-insert	discordant_read_pair&read_depth	3X
16	21515001	21595000	duplication	short-insert	discordant_read_pair&read_depth	3X
16	22450001	22710000	duplication	short-insert	discordant_read_pair&read_depth	3X
16	25340079	25343205	deletion	short-insert	discordant_read_pair&read_depth	3X
16	29710001	29820000	deletion	short-insert	discordant_read_pair&read_depth	3X
16	32020001	32185000	duplication	short-insert	discordant_read_pair&read_depth	3X
16	34465001	34755000	duplication	short-insert	discordant_read_pair&read_depth	3X
16	57366308	57367165	deletion	short-insert	discordant_read_pair&read_depth	3X
16	76539126	76544082	deletion	short-insert	discordant_read_pair&read_depth	3X
16	85149482	85150080	deletion	short-insert	discordant_read_pair&read_depth	3X
17	1	50000	deletion	short-insert	discordant_read_pair&read_depth	3X
17	12353132	12359260	deletion	short-insert	discordant_read_pair&read_depth	3X
17	16655001	16725000	duplication	short-insert	discordant_read_pair&read_depth	3X
17	18340001	18465000	deletion	short-insert	discordant_read_pair&read_depth	3X
17	18730001	18745000	deletion	short-insert	discordant_read_pair&read_depth	3X
17	21195001	21255000	duplication	short-insert	discordant_read_pair&read_depth	3X
17	21305001	21355000	duplication	short-insert	discordant_read_pair&read_depth	3X
17	34505001	34735000	deletion	short-insert	discordant_read_pair&read_depth	3X
17	36350001	36400000	deletion	short-insert	discordant_read_pair&read_depth	3X
17	39100001	39285000	deletion	short-insert	discordant_read_pair&read_depth	3X
17	39420001	39430000	deletion	short-insert	discordant_read_pair&read_depth	3X
17	41345001	41420000	deletion	short-insert	discordant_read_pair&read_depth	3X
17	43385001	43580000	deletion	short-insert	discordant_read_pair&read_depth	3X
17	44870001	44915000	deletion	short-insert	discordant_read_pair&read_depth	3X
17	66000001	66145000	deletion	short-insert	discordant_read_pair&read_depth	3X
17	77460001	77635000	deletion	short-insert	discordant_read_pair&read_depth	3X
17	81045001	81165000	deletion	short-insert	discordant_read_pair&read_depth	3X
17	81185001	81200000	deletion	short-insert	discordant_read_pair&read_depth	3X
18	13143162	13144266	deletion	short-insert	discordant_read_pair&read_depth	3X
18	24571524	24572389	deletion	short-insert	discordant_read_pair&read_depth	3X
18	30495663	30501248	deletion	short-insert	discordant_read_pair&read_depth	3X
18	41031554	41032526	deletion	short-insert	discordant_read_pair&read_depth	3X
18	74347199	74348014	deletion	short-insert	discordant_read_pair&read_depth	3X
19	8340001	8370000	deletion	short-insert	discordant_read_pair&read_depth	3X
19	17856123	17856794	deletion	short-insert	discordant_read_pair&read_depth	3X
19	20505001	20720000	deletion	short-insert	discordant_read_pair&read_depth	3X
19	29950193	29956171	deletion	short-insert	discordant_read_pair&read_depth	3X
19	35661076	35665812	deletion	short-insert	discordant_read_pair&read_depth	3X
19	46278665	46279761	deletion	short-insert	discordant_read_pair&read_depth	3X
19	46622729	46628379	deletion	short-insert	discordant_read_pair&read_depth	3X
19	53422159	53424224	deletion	short-insert	discordant_read_pair&read_depth	3X
19	53689173	53692027	deletion	short-insert	discordant_read_pair&read_depth	3X
19	55220001	55265000	deletion	short-insert	discordant_read_pair&read_depth	3X
19	55280001	55380000	deletion	short-insert	discordant_read_pair&read_depth	3X
20	1560001	1595000	deletion	short-insert	discordant_read_pair&read_depth	3X
20	24903664	24904490	deletion	short-insert	discordant_read_pair&read_depth	3X
20	25825001	25945000	duplication	short-insert	discordant_read_pair&read_depth	3X
20	25990001	26045000	deletion	short-insert	discordant_read_pair&read_depth	3X
20	26045001	26150000	duplication	short-insert	discordant_read_pair&read_depth	3X
20	29420001	29510000	duplication	short-insert	discordant_read_pair&read_depth	3X
20	29535001	29655000	duplication	short-insert	discordant_read_pair&read_depth	3X
20	31525468	31529426	deletion	short-insert	discordant_read_pair&read_depth	3X
20	42024599	42025821	deletion	short-insert	discordant_read_pair&read_depth	3X
20	52866253	52867346	deletion	short-insert	discordant_read_pair&read_depth	3X
20	54434623	54440630	deletion	short-insert	discordant_read_pair&read_depth	3X
20	61724614	61725649	deletion	short-insert	discordant_read_pair&read_depth	3X
20	62596209	62597503	deletion	short-insert	discordant_read_pair&read_depth	3X
21	11020001	11190000	duplication	short-insert	discordant_read_pair&read_depth	3X
21	14340001	14445000	duplication	short-insert	discordant_read_pair&read_depth	3X
21	14955001	15200000	deletion	short-insert	discordant_read_pair&read_depth	3X
21	24374782	24375486	deletion	short-insert	discordant_read_pair&read_depth	3X
21	31943161	31943591	duplication	short-insert	discordant_read_pair&read_depth	3X
21	33843057	33843761	deletion	short-insert	discordant_read_pair&read_depth	3X
22	16890001	16960000	duplication	short-insert	discordant_read_pair&read_depth	3X
22	17155001	17195000	deletion	short-insert	discordant_read_pair&read_depth	3X
22	17245001	17280000	deletion	short-insert	discordant_read_pair&read_depth	3X
22	17770357	17779195	deletion	short-insert	discordant_read_pair&read_depth	3X
22	18715001	18820000	duplication	short-insert	discordant_read_pair&read_depth	3X
22	21570001	21675000	duplication	short-insert	discordant_read_pair&read_depth	3X
22	21710001	21745000	deletion	short-insert	discordant_read_pair&read_depth	3X
22	22385001	22625000	deletion	short-insert	discordant_read_pair&read_depth	3X
22	22670001	23240000	deletion	short-insert	discordant_read_pair&read_depth	3X
22	24195898	24198607	deletion	short-insert	discordant_read_pair&read_depth	3X
22	25415001	25455000	deletion	short-insert	discordant_read_pair&read_depth	3X
22	27168084	27169813	deletion	short-insert	discordant_read_pair&read_depth	3X
22	28220001	28255000	deletion	short-insert	discordant_read_pair&read_depth	3X
22	33050001	33090000	deletion	short-insert	discordant_read_pair&read_depth	3X
22	36087941	36094354	deletion	short-insert	discordant_read_pair&read_depth	3X
22	37143182	37147959	deletion	short-insert	discordant_read_pair&read_depth	3X
22	43885001	43895000	deletion	short-insert	discordant_read_pair&read_depth	3X
22	50765001	50785000	deletion	short-insert	discordant_read_pair&read_depth	3X
X	3680001	3955000	deletion	short-insert	discordant_read_pair&read_depth	3X
X	16427616	16428283	deletion	short-insert	discordant_read_pair&read_depth	3X
X	56828560	56829538	duplication	short-insert	discordant_read_pair&read_depth	3X
X	76230001	76540000	deletion	short-insert	discordant_read_pair&read_depth	3X
X	76655001	77445000	deletion	short-insert	discordant_read_pair&read_depth	3X
X	81042428	81043112	deletion	short-insert	discordant_read_pair&read_depth	3X
X	120010001	120120000	deletion	short-insert	discordant_read_pair&read_depth	3X
X	127300001	127350000	deletion	short-insert	discordant_read_pair&read_depth	3X
X	145943110	145944017	deletion	short-insert	discordant_read_pair&read_depth	3X
X	151080001	151090000	deletion	short-insert	discordant_read_pair&read_depth	3X
X	152230001	152345000	deletion	short-insert	discordant_read_pair&read_depth	3X
X	154790001	154805000	deletion	short-insert	discordant_read_pair&read_depth	3X

## Sheet: 5X short-insert
Chr	Start	End	Type	Library	Detection	Coverage
1	75001	95000	deletion	short-insert	discordant_read_pair&read_depth	5X
1	180001	315000	deletion	short-insert	discordant_read_pair&read_depth	5X
1	1260001	1445000	deletion	short-insert	discordant_read_pair&read_depth	5X
1	5435001	5465000	deletion	short-insert	discordant_read_pair&read_depth	5X
1	11051426	11054605	duplication	short-insert	discordant_read_pair&read_depth	5X
1	16830001	17125000	duplication	short-insert	discordant_read_pair&read_depth	5X
1	24255001	24360000	deletion	short-insert	discordant_read_pair&read_depth	5X
1	25158598	25161534	deletion	short-insert	discordant_read_pair&read_depth	5X
1	25590001	25660000	deletion	short-insert	discordant_read_pair&read_depth	5X
1	35101427	35111990	deletion	short-insert	discordant_read_pair&read_depth	5X
1	43475001	43530000	deletion	short-insert	discordant_read_pair&read_depth	5X
1	56831108	56835031	deletion	short-insert	discordant_read_pair&read_depth	5X
1	58743812	58744814	deletion	short-insert	discordant_read_pair&read_depth	5X
1	60048632	60049675	deletion	short-insert	discordant_read_pair&read_depth	5X
1	63705345	63708146	deletion	short-insert	discordant_read_pair&read_depth	5X
1	66024186	66030265	deletion	short-insert	discordant_read_pair&read_depth	5X
1	68007951	68008836	deletion	short-insert	discordant_read_pair&read_depth	5X
1	72765001	72810000	deletion	short-insert	discordant_read_pair&read_depth	5X
1	78649137	78654148	deletion	short-insert	discordant_read_pair&read_depth	5X
1	84517942	84524635	deletion	short-insert	discordant_read_pair&read_depth	5X
1	89475876	89478739	deletion	short-insert	discordant_read_pair&read_depth	5X
1	94288297	94291251	deletion	short-insert	discordant_read_pair&read_depth	5X
1	103785001	104005000	deletion	short-insert	discordant_read_pair&read_depth	5X
1	104070001	104095000	deletion	short-insert	discordant_read_pair&read_depth	5X
1	109530001	109705000	deletion	short-insert	discordant_read_pair&read_depth	5X
1	109573176	109575207	deletion	short-insert	discordant_read_pair&read_depth	5X
1	110187199	110191414	deletion	short-insert	discordant_read_pair&read_depth	5X
1	110225001	110245000	deletion	short-insert	discordant_read_pair&read_depth	5X
1	115910001	116120000	deletion	short-insert	discordant_read_pair&read_depth	5X
1	142535001	142730000	duplication	short-insert	discordant_read_pair&read_depth	5X
1	142780001	142970000	duplication	short-insert	discordant_read_pair&read_depth	5X
1	143130001	143285000	duplication	short-insert	discordant_read_pair&read_depth	5X
1	144225001	144495000	deletion	short-insert	discordant_read_pair&read_depth	5X
1	152555518	152587783	deletion	short-insert	discordant_read_pair&read_depth	5X
1	152760001	152770000	deletion	short-insert	discordant_read_pair&read_depth	5X
1	156526702	156528972	deletion	short-insert	discordant_read_pair&read_depth	5X
1	159648713	159649680	deletion	short-insert	discordant_read_pair&read_depth	5X
1	168024419	168025761	deletion	short-insert	discordant_read_pair&read_depth	5X
1	184814738	184820851	deletion	short-insert	discordant_read_pair&read_depth	5X
1	187716101	187722551	deletion	short-insert	discordant_read_pair&read_depth	5X
1	188539337	188540288	deletion	short-insert	discordant_read_pair&read_depth	5X
1	189705001	189780000	deletion	short-insert	discordant_read_pair&read_depth	5X
1	194451042	194454303	deletion	short-insert	discordant_read_pair&read_depth	5X
1	197500466	197503344	deletion	short-insert	discordant_read_pair&read_depth	5X
1	199438696	199440232	deletion	short-insert	discordant_read_pair&read_depth	5X
1	199645001	199775000	deletion	short-insert	discordant_read_pair&read_depth	5X
1	207542031	207545597	deletion	short-insert	discordant_read_pair&read_depth	5X
1	218182456	218188714	deletion	short-insert	discordant_read_pair&read_depth	5X
1	222374087	222380533	deletion	short-insert	discordant_read_pair&read_depth	5X
1	228745001	228785000	duplication	short-insert	discordant_read_pair&read_depth	5X
1	229230001	229260000	deletion	short-insert	discordant_read_pair&read_depth	5X
1	229812511	229820900	deletion	short-insert	discordant_read_pair&read_depth	5X
1	233962205	233963614	deletion	short-insert	discordant_read_pair&read_depth	5X
1	235537090	235538425	deletion	short-insert	discordant_read_pair&read_depth	5X
1	236549034	236551338	deletion	short-insert	discordant_read_pair&read_depth	5X
1	248675001	248820000	deletion	short-insert	discordant_read_pair&read_depth	5X
1	248839526	248840953	deletion	short-insert	discordant_read_pair&read_depth	5X
2	4781197	4787354	deletion	short-insert	discordant_read_pair&read_depth	5X
2	16255001	16360000	deletion	short-insert	discordant_read_pair&read_depth	5X
2	16271528	16273861	deletion	short-insert	discordant_read_pair&read_depth	5X
2	19185001	19225000	deletion	short-insert	discordant_read_pair&read_depth	5X
2	22688490	22690041	deletion	short-insert	discordant_read_pair&read_depth	5X
2	34695001	34735000	deletion	short-insert	discordant_read_pair&read_depth	5X
2	35975001	35995000	deletion	short-insert	discordant_read_pair&read_depth	5X
2	42346262	42347312	deletion	short-insert	discordant_read_pair&read_depth	5X
2	48781834	48784938	deletion	short-insert	discordant_read_pair&read_depth	5X
2	52749684	52785279	deletion	short-insert	discordant_read_pair&read_depth	5X
2	54565457	54567509	deletion	short-insert	discordant_read_pair&read_depth	5X
2	76526464	76528914	deletion	short-insert	discordant_read_pair&read_depth	5X
2	76773548	76775467	deletion	short-insert	discordant_read_pair&read_depth	5X
2	79076559	79081208	deletion	short-insert	discordant_read_pair&read_depth	5X
2	89880001	89890000	deletion	short-insert	discordant_read_pair&read_depth	5X
2	91970001	92110000	duplication	short-insert	discordant_read_pair&read_depth	5X
2	98140001	98165000	deletion	short-insert	discordant_read_pair&read_depth	5X
2	106695044	106695891	deletion	short-insert	discordant_read_pair&read_depth	5X
2	108855382	108856290	deletion	short-insert	discordant_read_pair&read_depth	5X
2	110685001	110730000	deletion	short-insert	discordant_read_pair&read_depth	5X
2	110985001	111030000	deletion	short-insert	discordant_read_pair&read_depth	5X
2	111155001	111200000	deletion	short-insert	discordant_read_pair&read_depth	5X
2	127674735	127677273	deletion	short-insert	discordant_read_pair&read_depth	5X
2	131235001	131295000	deletion	short-insert	discordant_read_pair&read_depth	5X
2	132995001	133125000	duplication	short-insert	discordant_read_pair&read_depth	5X
2	134966654	134970124	deletion	short-insert	discordant_read_pair&read_depth	5X
2	146860001	146880000	deletion	short-insert	discordant_read_pair&read_depth	5X
2	155820001	155830000	deletion	short-insert	discordant_read_pair&read_depth	5X
2	160149116	160151647	deletion	short-insert	discordant_read_pair&read_depth	5X
2	180065001	180080000	deletion	short-insert	discordant_read_pair&read_depth	5X
2	194690001	194700000	deletion	short-insert	discordant_read_pair&read_depth	5X
2	217955836	217957358	deletion	short-insert	discordant_read_pair&read_depth	5X
2	220052316	220052930	deletion	short-insert	discordant_read_pair&read_depth	5X
2	223760182	223762669	deletion	short-insert	discordant_read_pair&read_depth	5X
2	239755001	239830000	deletion	short-insert	discordant_read_pair&read_depth	5X
2	242520001	242710000	deletion	short-insert	discordant_read_pair&read_depth	5X
3	228778	234404	deletion	short-insert	discordant_read_pair&read_depth	5X
3	11108272	11111900	deletion	short-insert	discordant_read_pair&read_depth	5X
3	16239381	16241224	deletion	short-insert	discordant_read_pair&read_depth	5X
3	18729918	18730893	deletion	short-insert	discordant_read_pair&read_depth	5X
3	22092370	22097796	deletion	short-insert	discordant_read_pair&read_depth	5X
3	26450972	26452321	deletion	short-insert	discordant_read_pair&read_depth	5X
3	33553186	33554155	deletion	short-insert	discordant_read_pair&read_depth	5X
3	42838369	42840825	deletion	short-insert	discordant_read_pair&read_depth	5X
3	46355001	46495000	deletion	short-insert	discordant_read_pair&read_depth	5X
3	47490630	47493432	deletion	short-insert	discordant_read_pair&read_depth	5X
3	65190001	65215000	deletion	short-insert	discordant_read_pair&read_depth	5X
3	67493579	67496859	deletion	short-insert	discordant_read_pair&read_depth	5X
3	67925001	68065000	deletion	short-insert	discordant_read_pair&read_depth	5X
3	75570001	75595000	deletion	short-insert	discordant_read_pair&read_depth	5X
3	75615001	75675000	deletion	short-insert	discordant_read_pair&read_depth	5X
3	76225001	76400000	deletion	short-insert	discordant_read_pair&read_depth	5X
3	83853013	83855389	deletion	short-insert	discordant_read_pair&read_depth	5X
3	95465724	95470804	deletion	short-insert	discordant_read_pair&read_depth	5X
3	120300001	120420000	deletion	short-insert	discordant_read_pair&read_depth	5X
3	124936223	124937195	deletion	short-insert	discordant_read_pair&read_depth	5X
3	129755001	129800000	deletion	short-insert	discordant_read_pair&read_depth	5X
3	133503730	133505117	deletion	short-insert	discordant_read_pair&read_depth	5X
3	146385161	146394872	deletion	short-insert	discordant_read_pair&read_depth	5X
3	146390417	146395141	duplication	short-insert	discordant_read_pair&read_depth	5X
3	152311721	152313233	deletion	short-insert	discordant_read_pair&read_depth	5X
3	162510001	162625000	deletion	short-insert	discordant_read_pair&read_depth	5X
3	162715001	162725000	deletion	short-insert	discordant_read_pair&read_depth	5X
3	177294461	177297480	deletion	short-insert	discordant_read_pair&read_depth	5X
3	178550037	178550909	deletion	short-insert	discordant_read_pair&read_depth	5X
3	186581012	186585304	deletion	short-insert	discordant_read_pair&read_depth	5X
3	187732857	187734793	deletion	short-insert	discordant_read_pair&read_depth	5X
3	192875001	192885000	deletion	short-insert	discordant_read_pair&read_depth	5X
3	194035001	194055000	deletion	short-insert	discordant_read_pair&read_depth	5X
3	194398788	194400290	deletion	short-insert	discordant_read_pair&read_depth	5X
3	195200001	195210000	deletion	short-insert	discordant_read_pair&read_depth	5X
4	15001	70000	duplication	short-insert	discordant_read_pair&read_depth	5X
4	2397774	2398467	deletion	short-insert	discordant_read_pair&read_depth	5X
4	3570001	3635000	duplication	short-insert	discordant_read_pair&read_depth	5X
4	4120001	4155000	deletion	short-insert	discordant_read_pair&read_depth	5X
4	6651571	6652903	deletion	short-insert	discordant_read_pair&read_depth	5X
4	6894773	6896128	deletion	short-insert	discordant_read_pair&read_depth	5X
4	8735001	8945000	deletion	short-insert	discordant_read_pair&read_depth	5X
4	9160001	9215000	deletion	short-insert	discordant_read_pair&read_depth	5X
4	9455001	9485000	deletion	short-insert	discordant_read_pair&read_depth	5X
4	10211264	10234592	deletion	short-insert	discordant_read_pair&read_depth	5X
4	21160963	21167126	deletion	short-insert	discordant_read_pair&read_depth	5X
4	31810001	31850000	deletion	short-insert	discordant_read_pair&read_depth	5X
4	32825001	32850000	deletion	short-insert	discordant_read_pair&read_depth	5X
4	34683508	34688567	duplication	short-insert	discordant_read_pair&read_depth	5X
4	34779930	34829029	deletion	short-insert	discordant_read_pair&read_depth	5X
4	64783596	64784560	deletion	short-insert	discordant_read_pair&read_depth	5X
4	69170001	69880000	deletion	short-insert	discordant_read_pair&read_depth	5X
4	70125001	70230000	deletion	short-insert	discordant_read_pair&read_depth	5X
4	75280001	75325000	deletion	short-insert	discordant_read_pair&read_depth	5X
4	75642717	75648852	deletion	short-insert	discordant_read_pair&read_depth	5X
4	80888042	80894100	deletion	short-insert	discordant_read_pair&read_depth	5X
4	86976371	86980020	deletion	short-insert	discordant_read_pair&read_depth	5X
4	91596796	91602996	deletion	short-insert	discordant_read_pair&read_depth	5X
4	102787782	102788499	deletion	short-insert	discordant_read_pair&read_depth	5X
4	103329520	103332191	deletion	short-insert	discordant_read_pair&read_depth	5X
4	107437757	107438473	deletion	short-insert	discordant_read_pair&read_depth	5X
4	116166886	116177216	deletion	short-insert	discordant_read_pair&read_depth	5X
4	133180741	133183069	deletion	short-insert	discordant_read_pair&read_depth	5X
4	139468848	139473247	deletion	short-insert	discordant_read_pair&read_depth	5X
4	161045001	161075000	deletion	short-insert	discordant_read_pair&read_depth	5X
4	167575001	167590000	deletion	short-insert	discordant_read_pair&read_depth	5X
4	167892554	167893761	deletion	short-insert	discordant_read_pair&read_depth	5X
4	173425001	173435000	deletion	short-insert	discordant_read_pair&read_depth	5X
4	178920718	178940676	duplication	short-insert	discordant_read_pair&read_depth	5X
4	180097869	180098540	deletion	short-insert	discordant_read_pair&read_depth	5X
4	181876747	181878295	deletion	short-insert	discordant_read_pair&read_depth	5X
4	186441638	186444103	deletion	short-insert	discordant_read_pair&read_depth	5X
4	187880001	187895000	deletion	short-insert	discordant_read_pair&read_depth	5X
4	187987652	187988405	deletion	short-insert	discordant_read_pair&read_depth	5X
4	190540001	190740000	duplication	short-insert	discordant_read_pair&read_depth	5X
4	190606999	190610421	deletion	short-insert	discordant_read_pair&read_depth	5X
4	190662865	190663721	deletion	short-insert	discordant_read_pair&read_depth	5X
5	1178257	1180755	deletion	short-insert	discordant_read_pair&read_depth	5X
5	1924550	1925215	deletion	short-insert	discordant_read_pair&read_depth	5X
5	1968411	1971646	deletion	short-insert	discordant_read_pair&read_depth	5X
5	12790001	13200000	deletion	short-insert	discordant_read_pair&read_depth	5X
5	13416530	13422873	deletion	short-insert	discordant_read_pair&read_depth	5X
5	17712883	17715847	duplication	short-insert	discordant_read_pair&read_depth	5X
5	21525001	21575000	duplication	short-insert	discordant_read_pair&read_depth	5X
5	23902902	23905294	deletion	short-insert	discordant_read_pair&read_depth	5X
5	24370546	24373475	deletion	short-insert	discordant_read_pair&read_depth	5X
5	42165922	42167878	deletion	short-insert	discordant_read_pair&read_depth	5X
5	57323464	57333815	deletion	short-insert	discordant_read_pair&read_depth	5X
5	57679932	57686094	deletion	short-insert	discordant_read_pair&read_depth	5X
5	60001708	60003700	deletion	short-insert	discordant_read_pair&read_depth	5X
5	69215001	69290000	deletion	short-insert	discordant_read_pair&read_depth	5X
5	69410001	69455000	deletion	short-insert	discordant_read_pair&read_depth	5X
5	71890001	72000000	deletion	short-insert	discordant_read_pair&read_depth	5X
5	79049596	79051882	duplication	short-insert	discordant_read_pair&read_depth	5X
5	86245998	86247295	deletion	short-insert	discordant_read_pair&read_depth	5X
5	90499777	90502231	deletion	short-insert	discordant_read_pair&read_depth	5X
5	104430001	104500000	deletion	short-insert	discordant_read_pair&read_depth	5X
5	119380125	119382685	deletion	short-insert	discordant_read_pair&read_depth	5X
5	121059202	121060079	deletion	short-insert	discordant_read_pair&read_depth	5X
5	125496700	125498763	deletion	short-insert	discordant_read_pair&read_depth	5X
5	127336002	127336966	deletion	short-insert	discordant_read_pair&read_depth	5X
5	135115180	135120759	deletion	short-insert	discordant_read_pair&read_depth	5X
5	138785001	138910000	deletion	short-insert	discordant_read_pair&read_depth	5X
5	177330001	177350000	deletion	short-insert	discordant_read_pair&read_depth	5X
5	180265001	180405000	deletion	short-insert	discordant_read_pair&read_depth	5X
6	125001	200000	deletion	short-insert	discordant_read_pair&read_depth	5X
6	255001	380000	duplication	short-insert	discordant_read_pair&read_depth	5X
6	666348	667852	deletion	short-insert	discordant_read_pair&read_depth	5X
6	10264459	10265311	deletion	short-insert	discordant_read_pair&read_depth	5X
6	13882493	13883923	deletion	short-insert	discordant_read_pair&read_depth	5X
6	18402054	18402879	deletion	short-insert	discordant_read_pair&read_depth	5X
6	23734655	23758732	duplication	short-insert	discordant_read_pair&read_depth	5X
6	29685428	29688087	deletion	short-insert	discordant_read_pair&read_depth	5X
6	31421490	31424541	deletion	short-insert	discordant_read_pair&read_depth	5X
6	32561917	32564666	deletion	short-insert	discordant_read_pair&read_depth	5X
6	35754577	35766762	duplication	short-insert	discordant_read_pair&read_depth	5X
6	55825959	55846753	deletion	short-insert	discordant_read_pair&read_depth	5X
6	57205001	57610000	duplication	short-insert	discordant_read_pair&read_depth	5X
6	57423060	57429152	deletion	short-insert	discordant_read_pair&read_depth	5X
6	57478160	57478854	deletion	short-insert	discordant_read_pair&read_depth	5X
6	64666989	64668373	deletion	short-insert	discordant_read_pair&read_depth	5X
6	66259990	66262135	deletion	short-insert	discordant_read_pair&read_depth	5X
6	66594914	66595825	deletion	short-insert	discordant_read_pair&read_depth	5X
6	67010001	67050000	deletion	short-insert	discordant_read_pair&read_depth	5X
6	74613574	74620369	deletion	short-insert	discordant_read_pair&read_depth	5X
6	74865443	74866583	deletion	short-insert	discordant_read_pair&read_depth	5X
6	78965001	79035000	deletion	short-insert	discordant_read_pair&read_depth	5X
6	85318161	85324228	deletion	short-insert	discordant_read_pair&read_depth	5X
6	86637027	86640820	duplication	short-insert	discordant_read_pair&read_depth	5X
6	86708742	86714805	deletion	short-insert	discordant_read_pair&read_depth	5X
6	87012158	87013626	deletion	short-insert	discordant_read_pair&read_depth	5X
6	100034461	100035318	deletion	short-insert	discordant_read_pair&read_depth	5X
6	103735001	103765000	deletion	short-insert	discordant_read_pair&read_depth	5X
6	115240001	115575000	deletion	short-insert	discordant_read_pair&read_depth	5X
6	132106568	132108802	deletion	short-insert	discordant_read_pair&read_depth	5X
6	132707405	132712432	deletion	short-insert	discordant_read_pair&read_depth	5X
6	151485909	151486951	deletion	short-insert	discordant_read_pair&read_depth	5X
6	153029975	153033831	deletion	short-insert	discordant_read_pair&read_depth	5X
6	157470001	158070000	deletion	short-insert	discordant_read_pair&read_depth	5X
6	161035001	161065000	duplication	short-insert	discordant_read_pair&read_depth	5X
6	167835001	168295000	deletion	short-insert	discordant_read_pair&read_depth	5X
7	235001	670000	deletion	short-insert	discordant_read_pair&read_depth	5X
7	10504303	10506222	deletion	short-insert	discordant_read_pair&read_depth	5X
7	13022079	13028669	deletion	short-insert	discordant_read_pair&read_depth	5X
7	28574298	28575154	deletion	short-insert	discordant_read_pair&read_depth	5X
7	31315503	31319005	deletion	short-insert	discordant_read_pair&read_depth	5X
7	32390127	32393113	deletion	short-insert	discordant_read_pair&read_depth	5X
7	36441210	36442092	deletion	short-insert	discordant_read_pair&read_depth	5X
7	47708755	47709518	duplication	short-insert	discordant_read_pair&read_depth	5X
7	48200001	48235000	deletion	short-insert	discordant_read_pair&read_depth	5X
7	51594256	51598765	deletion	short-insert	discordant_read_pair&read_depth	5X
7	55286762	55289153	deletion	short-insert	discordant_read_pair&read_depth	5X
7	56217724	56220357	deletion	short-insert	discordant_read_pair&read_depth	5X
7	57065001	57085000	deletion	short-insert	discordant_read_pair&read_depth	5X
7	57605001	57775000	duplication	short-insert	discordant_read_pair&read_depth	5X
7	64950001	65060000	duplication	short-insert	discordant_read_pair&read_depth	5X
7	73828499	73831369	deletion	short-insert	discordant_read_pair&read_depth	5X
7	74615001	74910000	deletion	short-insert	discordant_read_pair&read_depth	5X
7	81441582	81442475	deletion	short-insert	discordant_read_pair&read_depth	5X
7	83050149	83051209	deletion	short-insert	discordant_read_pair&read_depth	5X
7	93416926	93423057	deletion	short-insert	discordant_read_pair&read_depth	5X
7	96475801	96482008	deletion	short-insert	discordant_read_pair&read_depth	5X
7	101001174	101005617	deletion	short-insert	discordant_read_pair&read_depth	5X
7	101290001	101330000	deletion	short-insert	discordant_read_pair&read_depth	5X
7	102125001	102330000	duplication	short-insert	discordant_read_pair&read_depth	5X
7	110181970	110188497	deletion	short-insert	discordant_read_pair&read_depth	5X
7	113415999	113422224	deletion	short-insert	discordant_read_pair&read_depth	5X
7	126045807	126051469	deletion	short-insert	discordant_read_pair&read_depth	5X
7	127214948	127217993	deletion	short-insert	discordant_read_pair&read_depth	5X
7	141765001	141795000	deletion	short-insert	discordant_read_pair&read_depth	5X
7	143500001	143535000	deletion	short-insert	discordant_read_pair&read_depth	5X
7	143895001	144070000	duplication	short-insert	discordant_read_pair&read_depth	5X
7	151230130	151231854	deletion	short-insert	discordant_read_pair&read_depth	5X
7	155105001	155125000	deletion	short-insert	discordant_read_pair&read_depth	5X
7	158046637	158047290	deletion	short-insert	discordant_read_pair&read_depth	5X
7	158930001	159040000	deletion	short-insert	discordant_read_pair&read_depth	5X
8	1340001	1355000	deletion	short-insert	discordant_read_pair&read_depth	5X
8	4122870	4124981	deletion	short-insert	discordant_read_pair&read_depth	5X
8	7050001	7110000	deletion	short-insert	discordant_read_pair&read_depth	5X
8	11895001	11980000	deletion	short-insert	discordant_read_pair&read_depth	5X
8	12085001	12250000	deletion	short-insert	discordant_read_pair&read_depth	5X
8	12395001	12460000	duplication	short-insert	discordant_read_pair&read_depth	5X
8	16275001	16325000	deletion	short-insert	discordant_read_pair&read_depth	5X
8	18454628	18455960	deletion	short-insert	discordant_read_pair&read_depth	5X
8	18651394	18652452	deletion	short-insert	discordant_read_pair&read_depth	5X
8	21620001	21660000	deletion	short-insert	discordant_read_pair&read_depth	5X
8	30603966	30605637	deletion	short-insert	discordant_read_pair&read_depth	5X
8	37795001	37805000	deletion	short-insert	discordant_read_pair&read_depth	5X
8	39230001	39385000	deletion	short-insert	discordant_read_pair&read_depth	5X
8	40774508	40779729	deletion	short-insert	discordant_read_pair&read_depth	5X
8	48130001	48145000	deletion	short-insert	discordant_read_pair&read_depth	5X
8	49093337	49094025	deletion	short-insert	discordant_read_pair&read_depth	5X
8	62035341	62036015	deletion	short-insert	discordant_read_pair&read_depth	5X
8	71583574	71584747	deletion	short-insert	discordant_read_pair&read_depth	5X
8	73787719	73793872	deletion	short-insert	discordant_read_pair&read_depth	5X
8	85910001	86005000	deletion	short-insert	discordant_read_pair&read_depth	5X
8	86725001	86840000	duplication	short-insert	discordant_read_pair&read_depth	5X
8	96875217	96879580	deletion	short-insert	discordant_read_pair&read_depth	5X
8	103994744	103996664	deletion	short-insert	discordant_read_pair&read_depth	5X
8	112293987	112297169	deletion	short-insert	discordant_read_pair&read_depth	5X
8	129465158	129471310	deletion	short-insert	discordant_read_pair&read_depth	5X
8	131850750	131852742	deletion	short-insert	discordant_read_pair&read_depth	5X
8	142960001	142970000	deletion	short-insert	discordant_read_pair&read_depth	5X
8	144010001	144035000	deletion	short-insert	discordant_read_pair&read_depth	5X
8	144700001	144715000	deletion	short-insert	discordant_read_pair&read_depth	5X
8	145185001	145215000	deletion	short-insert	discordant_read_pair&read_depth	5X
8	145290001	145500000	deletion	short-insert	discordant_read_pair&read_depth	5X
8	145515001	145565000	deletion	short-insert	discordant_read_pair&read_depth	5X
8	146057007	146057862	deletion	short-insert	discordant_read_pair&read_depth	5X
9	22495001	22505000	deletion	short-insert	discordant_read_pair&read_depth	5X
9	23362750	23377696	deletion	short-insert	discordant_read_pair&read_depth	5X
9	31291329	31292665	deletion	short-insert	discordant_read_pair&read_depth	5X
9	33213031	33213949	deletion	short-insert	discordant_read_pair&read_depth	5X
9	36362913	36364132	deletion	short-insert	discordant_read_pair&read_depth	5X
9	39000001	39185000	duplication	short-insert	discordant_read_pair&read_depth	5X
9	41020001	41215000	deletion	short-insert	discordant_read_pair&read_depth	5X
9	42145001	42320000	duplication	short-insert	discordant_read_pair&read_depth	5X
9	42365001	42375000	deletion	short-insert	discordant_read_pair&read_depth	5X
9	42460001	42560000	duplication	short-insert	discordant_read_pair&read_depth	5X
9	43610001	43625000	deletion	short-insert	discordant_read_pair&read_depth	5X
9	43910001	44055000	deletion	short-insert	discordant_read_pair&read_depth	5X
9	44245001	44280000	deletion	short-insert	discordant_read_pair&read_depth	5X
9	44445001	44730000	deletion	short-insert	discordant_read_pair&read_depth	5X
9	45055001	45075000	deletion	short-insert	discordant_read_pair&read_depth	5X
9	45350001	45480000	duplication	short-insert	discordant_read_pair&read_depth	5X
9	46080001	46120000	deletion	short-insert	discordant_read_pair&read_depth	5X
9	46390001	46420000	deletion	short-insert	discordant_read_pair&read_depth	5X
9	65645001	65705000	deletion	short-insert	discordant_read_pair&read_depth	5X
9	66080001	66245000	deletion	short-insert	discordant_read_pair&read_depth	5X
9	66345001	66455000	deletion	short-insert	discordant_read_pair&read_depth	5X
9	67715001	67745000	deletion	short-insert	discordant_read_pair&read_depth	5X
9	67825001	67980000	duplication	short-insert	discordant_read_pair&read_depth	5X
9	68340001	68505000	duplication	short-insert	discordant_read_pair&read_depth	5X
9	68985001	69275000	duplication	short-insert	discordant_read_pair&read_depth	5X
9	69330001	69575000	duplication	short-insert	discordant_read_pair&read_depth	5X
9	70575001	70720000	duplication	short-insert	discordant_read_pair&read_depth	5X
9	70840001	70945000	duplication	short-insert	discordant_read_pair&read_depth	5X
9	71738063	71743376	deletion	short-insert	discordant_read_pair&read_depth	5X
9	73315001	73350000	deletion	short-insert	discordant_read_pair&read_depth	5X
9	83967932	83970675	deletion	short-insert	discordant_read_pair&read_depth	5X
9	89154541	89155946	deletion	short-insert	discordant_read_pair&read_depth	5X
9	90858985	90860993	deletion	short-insert	discordant_read_pair&read_depth	5X
9	101308998	101311659	deletion	short-insert	discordant_read_pair&read_depth	5X
9	110033418	110035438	deletion	short-insert	discordant_read_pair&read_depth	5X
9	110537521	110540654	deletion	short-insert	discordant_read_pair&read_depth	5X
9	124226989	124227776	duplication	short-insert	discordant_read_pair&read_depth	5X
9	131700920	131702110	deletion	short-insert	discordant_read_pair&read_depth	5X
9	133030645	133034862	deletion	short-insert	discordant_read_pair&read_depth	5X
9	136415001	136455000	deletion	short-insert	discordant_read_pair&read_depth	5X
9	138925001	138945000	deletion	short-insert	discordant_read_pair&read_depth	5X
10	4290068	4291699	deletion	short-insert	discordant_read_pair&read_depth	5X
10	4708522	4710538	deletion	short-insert	discordant_read_pair&read_depth	5X
10	6097298	6097916	deletion	short-insert	discordant_read_pair&read_depth	5X
10	7076958	7078298	deletion	short-insert	discordant_read_pair&read_depth	5X
10	24376767	24378467	deletion	short-insert	discordant_read_pair&read_depth	5X
10	31246701	31251760	deletion	short-insert	discordant_read_pair&read_depth	5X
10	32257897	32260630	deletion	short-insert	discordant_read_pair&read_depth	5X
10	38870001	38985000	duplication	short-insert	discordant_read_pair&read_depth	5X
10	42740001	42820000	duplication	short-insert	discordant_read_pair&read_depth	5X
10	46955001	47150000	duplication	short-insert	discordant_read_pair&read_depth	5X
10	51135001	51360000	deletion	short-insert	discordant_read_pair&read_depth	5X
10	51635001	51720000	deletion	short-insert	discordant_read_pair&read_depth	5X
10	51835001	52000000	deletion	short-insert	discordant_read_pair&read_depth	5X
10	59209793	59211887	deletion	short-insert	discordant_read_pair&read_depth	5X
10	78255552	78261039	deletion	short-insert	discordant_read_pair&read_depth	5X
10	81475001	81505000	deletion	short-insert	discordant_read_pair&read_depth	5X
10	95545389	95546531	deletion	short-insert	discordant_read_pair&read_depth	5X
10	105053170	105054175	deletion	short-insert	discordant_read_pair&read_depth	5X
10	108030304	108032598	deletion	short-insert	discordant_read_pair&read_depth	5X
10	111572111	111578255	deletion	short-insert	discordant_read_pair&read_depth	5X
10	114110001	114120000	deletion	short-insert	discordant_read_pair&read_depth	5X
10	114157772	114158180	deletion	short-insert	discordant_read_pair&read_depth	5X
10	122226705	122228842	deletion	short-insert	discordant_read_pair&read_depth	5X
11	3270001	3360000	deletion	short-insert	discordant_read_pair&read_depth	5X
11	4245001	4335000	deletion	short-insert	discordant_read_pair&read_depth	5X
11	10259989	10261341	deletion	short-insert	discordant_read_pair&read_depth	5X
11	25445001	25455000	deletion	short-insert	discordant_read_pair&read_depth	5X
11	29005001	29015000	deletion	short-insert	discordant_read_pair&read_depth	5X
11	29967584	29968492	deletion	short-insert	discordant_read_pair&read_depth	5X
11	45429852	45431637	deletion	short-insert	discordant_read_pair&read_depth	5X
11	47057568	47063740	deletion	short-insert	discordant_read_pair&read_depth	5X
11	55365001	55460000	deletion	short-insert	discordant_read_pair&read_depth	5X
11	58166928	58168217	deletion	short-insert	discordant_read_pair&read_depth	5X
11	58594200	58596045	deletion	short-insert	discordant_read_pair&read_depth	5X
11	60975001	61015000	deletion	short-insert	discordant_read_pair&read_depth	5X
11	63698853	63701656	deletion	short-insert	discordant_read_pair&read_depth	5X
11	69400744	69401450	deletion	short-insert	discordant_read_pair&read_depth	5X
11	69700001	69815000	deletion	short-insert	discordant_read_pair&read_depth	5X
11	95169367	95175421	deletion	short-insert	discordant_read_pair&read_depth	5X
11	116680001	116720000	deletion	short-insert	discordant_read_pair&read_depth	5X
11	124774986	124778305	deletion	short-insert	discordant_read_pair&read_depth	5X
12	8560001	8590000	deletion	short-insert	discordant_read_pair&read_depth	5X
12	9630001	9735000	deletion	short-insert	discordant_read_pair&read_depth	5X
12	11220001	11250000	deletion	short-insert	discordant_read_pair&read_depth	5X
12	11505001	11545000	deletion	short-insert	discordant_read_pair&read_depth	5X
12	17607290	17607831	deletion	short-insert	discordant_read_pair&read_depth	5X
12	22570001	22590000	deletion	short-insert	discordant_read_pair&read_depth	5X
12	45902992	45909964	deletion	short-insert	discordant_read_pair&read_depth	5X
12	71602359	71604491	deletion	short-insert	discordant_read_pair&read_depth	5X
12	76505001	76520000	deletion	short-insert	discordant_read_pair&read_depth	5X
12	80154931	80162816	duplication	short-insert	discordant_read_pair&read_depth	5X
12	83843963	83844694	deletion	short-insert	discordant_read_pair&read_depth	5X
12	87204842	87205845	duplication	short-insert	discordant_read_pair&read_depth	5X
12	99793849	99802764	deletion	short-insert	discordant_read_pair&read_depth	5X
12	100288341	100291834	deletion	short-insert	discordant_read_pair&read_depth	5X
12	133505001	133680000	deletion	short-insert	discordant_read_pair&read_depth	5X
12	133780001	133820000	deletion	short-insert	discordant_read_pair&read_depth	5X
13	28268118	28269054	deletion	short-insert	discordant_read_pair&read_depth	5X
13	34192570	34193351	deletion	short-insert	discordant_read_pair&read_depth	5X
13	45042437	45043155	deletion	short-insert	discordant_read_pair&read_depth	5X
13	50378179	50379215	duplication	short-insert	discordant_read_pair&read_depth	5X
13	51069351	51075140	deletion	short-insert	discordant_read_pair&read_depth	5X
13	101894125	101896502	deletion	short-insert	discordant_read_pair&read_depth	5X
14	19000001	19125000	duplication	short-insert	discordant_read_pair&read_depth	5X
14	24450001	24480000	deletion	short-insert	discordant_read_pair&read_depth	5X
14	29728054	29728866	deletion	short-insert	discordant_read_pair&read_depth	5X
14	40609801	40617677	deletion	short-insert	discordant_read_pair&read_depth	5X
14	65360310	65363535	deletion	short-insert	discordant_read_pair&read_depth	5X
14	73995001	74025000	deletion	short-insert	discordant_read_pair&read_depth	5X
14	105576620	105579633	deletion	short-insert	discordant_read_pair&read_depth	5X
15	20000001	20150000	duplication	short-insert	discordant_read_pair&read_depth	5X
15	20390001	20625000	duplication	short-insert	discordant_read_pair&read_depth	5X
15	20630001	20845000	deletion	short-insert	discordant_read_pair&read_depth	5X
15	21900001	21940000	duplication	short-insert	discordant_read_pair&read_depth	5X
15	22180001	22295000	deletion	short-insert	discordant_read_pair&read_depth	5X
15	22710001	22730000	deletion	short-insert	discordant_read_pair&read_depth	5X
15	23510001	23640000	deletion	short-insert	discordant_read_pair&read_depth	5X
15	27135001	27185000	deletion	short-insert	discordant_read_pair&read_depth	5X
15	27585001	27595000	deletion	short-insert	discordant_read_pair&read_depth	5X
15	29100001	29210000	deletion	short-insert	discordant_read_pair&read_depth	5X
15	39372349	39373552	deletion	short-insert	discordant_read_pair&read_depth	5X
15	72385992	72388297	deletion	short-insert	discordant_read_pair&read_depth	5X
15	76884599	76896943	deletion	short-insert	discordant_read_pair&read_depth	5X
15	85775001	85785000	deletion	short-insert	discordant_read_pair&read_depth	5X
15	98842330	98843885	deletion	short-insert	discordant_read_pair&read_depth	5X
15	99574439	99575644	deletion	short-insert	discordant_read_pair&read_depth	5X
16	1422843	1424162	deletion	short-insert	discordant_read_pair&read_depth	5X
16	14990001	15125000	duplication	short-insert	discordant_read_pair&read_depth	5X
16	18475001	18485000	deletion	short-insert	discordant_read_pair&read_depth	5X
16	19945525	19967597	deletion	short-insert	discordant_read_pair&read_depth	5X
16	21410001	21595000	duplication	short-insert	discordant_read_pair&read_depth	5X
16	21745001	21805000	duplication	short-insert	discordant_read_pair&read_depth	5X
16	22435001	22710000	duplication	short-insert	discordant_read_pair&read_depth	5X
16	23047765	23049538	deletion	short-insert	discordant_read_pair&read_depth	5X
16	25340079	25343205	deletion	short-insert	discordant_read_pair&read_depth	5X
16	29710001	29820000	deletion	short-insert	discordant_read_pair&read_depth	5X
16	34465001	34760000	duplication	short-insert	discordant_read_pair&read_depth	5X
16	57366308	57367136	deletion	short-insert	discordant_read_pair&read_depth	5X
16	76539126	76544082	deletion	short-insert	discordant_read_pair&read_depth	5X
16	85149482	85150080	deletion	short-insert	discordant_read_pair&read_depth	5X
17	1	50000	deletion	short-insert	discordant_read_pair&read_depth	5X
17	723789	724891	deletion	short-insert	discordant_read_pair&read_depth	5X
17	2719868	2721227	deletion	short-insert	discordant_read_pair&read_depth	5X
17	12345619	12347349	deletion	short-insert	discordant_read_pair&read_depth	5X
17	12353132	12359260	deletion	short-insert	discordant_read_pair&read_depth	5X
17	16655001	16725000	duplication	short-insert	discordant_read_pair&read_depth	5X
17	18350001	18490000	deletion	short-insert	discordant_read_pair&read_depth	5X
17	18730001	18745000	deletion	short-insert	discordant_read_pair&read_depth	5X
17	18791114	18792257	deletion	short-insert	discordant_read_pair&read_depth	5X
17	21190001	21255000	duplication	short-insert	discordant_read_pair&read_depth	5X
17	21305001	21355000	duplication	short-insert	discordant_read_pair&read_depth	5X
17	21670001	21700000	deletion	short-insert	discordant_read_pair&read_depth	5X
17	36350001	36400000	deletion	short-insert	discordant_read_pair&read_depth	5X
17	39100001	39285000	deletion	short-insert	discordant_read_pair&read_depth	5X
17	39420001	39430000	deletion	short-insert	discordant_read_pair&read_depth	5X
17	41345001	41420000	deletion	short-insert	discordant_read_pair&read_depth	5X
17	43375001	43570000	deletion	short-insert	discordant_read_pair&read_depth	5X
17	44870001	44915000	deletion	short-insert	discordant_read_pair&read_depth	5X
17	66000001	66145000	deletion	short-insert	discordant_read_pair&read_depth	5X
17	77460001	77530000	deletion	short-insert	discordant_read_pair&read_depth	5X
17	78834672	78835365	deletion	short-insert	discordant_read_pair&read_depth	5X
17	81045001	81200000	deletion	short-insert	discordant_read_pair&read_depth	5X
18	13143162	13144193	deletion	short-insert	discordant_read_pair&read_depth	5X
18	24571524	24572389	deletion	short-insert	discordant_read_pair&read_depth	5X
18	30495663	30501248	deletion	short-insert	discordant_read_pair&read_depth	5X
18	38864757	38868418	deletion	short-insert	discordant_read_pair&read_depth	5X
18	41031554	41032526	deletion	short-insert	discordant_read_pair&read_depth	5X
18	46979004	46979681	deletion	short-insert	discordant_read_pair&read_depth	5X
18	59672785	59674328	deletion	short-insert	discordant_read_pair&read_depth	5X
18	74347199	74348014	deletion	short-insert	discordant_read_pair&read_depth	5X
18	75266960	75268157	deletion	short-insert	discordant_read_pair&read_depth	5X
19	8340001	8365000	deletion	short-insert	discordant_read_pair&read_depth	5X
19	13775701	13776846	deletion	short-insert	discordant_read_pair&read_depth	5X
19	15046382	15049506	deletion	short-insert	discordant_read_pair&read_depth	5X
19	17856123	17856794	deletion	short-insert	discordant_read_pair&read_depth	5X
19	20505001	20720000	deletion	short-insert	discordant_read_pair&read_depth	5X
19	29950193	29956171	deletion	short-insert	discordant_read_pair&read_depth	5X
19	35661076	35665812	deletion	short-insert	discordant_read_pair&read_depth	5X
19	40613093	40615758	deletion	short-insert	discordant_read_pair&read_depth	5X
19	44183468	44184048	duplication	short-insert	discordant_read_pair&read_depth	5X
19	46278665	46279745	deletion	short-insert	discordant_read_pair&read_depth	5X
19	46622729	46628379	deletion	short-insert	discordant_read_pair&read_depth	5X
19	52135001	52150000	deletion	short-insert	discordant_read_pair&read_depth	5X
19	53422159	53424222	deletion	short-insert	discordant_read_pair&read_depth	5X
19	53689173	53692027	deletion	short-insert	discordant_read_pair&read_depth	5X
19	55220001	55380000	deletion	short-insert	discordant_read_pair&read_depth	5X
20	1389132	1390895	deletion	short-insert	discordant_read_pair&read_depth	5X
20	1560001	1595000	deletion	short-insert	discordant_read_pair&read_depth	5X
20	24388734	24389543	deletion	short-insert	discordant_read_pair&read_depth	5X
20	24903664	24904444	deletion	short-insert	discordant_read_pair&read_depth	5X
20	25825001	25945000	duplication	short-insert	discordant_read_pair&read_depth	5X
20	25990001	26045000	deletion	short-insert	discordant_read_pair&read_depth	5X
20	29420001	29520000	duplication	short-insert	discordant_read_pair&read_depth	5X
20	29535001	29655000	duplication	short-insert	discordant_read_pair&read_depth	5X
20	31525468	31529426	deletion	short-insert	discordant_read_pair&read_depth	5X
20	42024599	42025821	deletion	short-insert	discordant_read_pair&read_depth	5X
20	42325120	42325558	duplication	short-insert	discordant_read_pair&read_depth	5X
20	52645001	52660000	deletion	short-insert	discordant_read_pair&read_depth	5X
20	52866253	52867346	deletion	short-insert	discordant_read_pair&read_depth	5X
20	54434623	54440630	deletion	short-insert	discordant_read_pair&read_depth	5X
20	56079234	56080564	deletion	short-insert	discordant_read_pair&read_depth	5X
20	61724614	61725649	deletion	short-insert	discordant_read_pair&read_depth	5X
20	62596209	62597503	deletion	short-insert	discordant_read_pair&read_depth	5X
21	11020001	11190000	duplication	short-insert	discordant_read_pair&read_depth	5X
21	14340001	14445000	duplication	short-insert	discordant_read_pair&read_depth	5X
21	14955001	15200000	deletion	short-insert	discordant_read_pair&read_depth	5X
21	24374782	24375486	deletion	short-insert	discordant_read_pair&read_depth	5X
21	31943161	31943591	duplication	short-insert	discordant_read_pair&read_depth	5X
21	33843057	33843761	deletion	short-insert	discordant_read_pair&read_depth	5X
21	46448045	46448632	deletion	short-insert	discordant_read_pair&read_depth	5X
22	16845001	16960000	duplication	short-insert	discordant_read_pair&read_depth	5X
22	16975001	17005000	deletion	short-insert	discordant_read_pair&read_depth	5X
22	17155001	17195000	deletion	short-insert	discordant_read_pair&read_depth	5X
22	17240001	17280000	deletion	short-insert	discordant_read_pair&read_depth	5X
22	17770357	17779195	deletion	short-insert	discordant_read_pair&read_depth	5X
22	18765001	18820000	duplication	short-insert	discordant_read_pair&read_depth	5X
22	20062744	20063146	duplication	short-insert	discordant_read_pair&read_depth	5X
22	21560001	21675000	duplication	short-insert	discordant_read_pair&read_depth	5X
22	21710001	21755000	deletion	short-insert	discordant_read_pair&read_depth	5X
22	21815001	21905000	deletion	short-insert	discordant_read_pair&read_depth	5X
22	22385001	22620000	deletion	short-insert	discordant_read_pair&read_depth	5X
22	22670001	23240000	deletion	short-insert	discordant_read_pair&read_depth	5X
22	24195898	24198607	deletion	short-insert	discordant_read_pair&read_depth	5X
22	25415001	25455000	deletion	short-insert	discordant_read_pair&read_depth	5X
22	27168084	27169812	deletion	short-insert	discordant_read_pair&read_depth	5X
22	28220001	28255000	deletion	short-insert	discordant_read_pair&read_depth	5X
22	33050001	33090000	deletion	short-insert	discordant_read_pair&read_depth	5X
22	36087941	36094354	deletion	short-insert	discordant_read_pair&read_depth	5X
22	37143182	37147959	deletion	short-insert	discordant_read_pair&read_depth	5X
22	37905600	37906354	deletion	short-insert	discordant_read_pair&read_depth	5X
22	43885001	43895000	deletion	short-insert	discordant_read_pair&read_depth	5X
22	50765001	50785000	deletion	short-insert	discordant_read_pair&read_depth	5X
X	3680001	3955000	deletion	short-insert	discordant_read_pair&read_depth	5X
X	5055306	5057547	deletion	short-insert	discordant_read_pair&read_depth	5X
X	16427616	16428283	deletion	short-insert	discordant_read_pair&read_depth	5X
X	56828560	56829538	duplication	short-insert	discordant_read_pair&read_depth	5X
X	67123817	67130300	deletion	short-insert	discordant_read_pair&read_depth	5X
X	76230001	76540000	deletion	short-insert	discordant_read_pair&read_depth	5X
X	76655001	77440000	deletion	short-insert	discordant_read_pair&read_depth	5X
X	81042428	81043112	deletion	short-insert	discordant_read_pair&read_depth	5X
X	81980001	81990000	deletion	short-insert	discordant_read_pair&read_depth	5X
X	120010001	120120000	deletion	short-insert	discordant_read_pair&read_depth	5X
X	127300001	127350000	deletion	short-insert	discordant_read_pair&read_depth	5X
X	134161390	134162111	deletion	short-insert	discordant_read_pair&read_depth	5X
X	144422011	144424521	deletion	short-insert	discordant_read_pair&read_depth	5X
X	145943156	145943963	deletion	short-insert	discordant_read_pair&read_depth	5X
X	149927828	149928893	deletion	short-insert	discordant_read_pair&read_depth	5X
X	151080001	151090000	deletion	short-insert	discordant_read_pair&read_depth	5X
X	152230001	152350000	deletion	short-insert	discordant_read_pair&read_depth	5X
X	154790001	154805000	deletion	short-insert	discordant_read_pair&read_depth	5X

## Sheet: 1X 3kb mate-pair
Chr	Start	End	Type	Library	Detection	Coverage
1	175001	325000	deletion	3kb mate-pair	discordant_read_pair&read_depth	1X
1	11052424	11054538	duplication	3kb mate-pair	discordant_read_pair&read_depth	1X
1	16855001	17005000	duplication	3kb mate-pair	discordant_read_pair&read_depth	1X
1	17015001	17125000	duplication	3kb mate-pair	discordant_read_pair&read_depth	1X
1	25158696	25161634	deletion	3kb mate-pair	discordant_read_pair&read_depth	1X
1	39997994	40002683	deletion	3kb mate-pair	discordant_read_pair&read_depth	1X
1	56831074	56835538	deletion	3kb mate-pair	discordant_read_pair&read_depth	1X
1	66024086	66030322	deletion	3kb mate-pair	discordant_read_pair&read_depth	1X
1	72765469	72811988	deletion	3kb mate-pair	discordant_read_pair&read_depth	1X
1	89475200	89478819	deletion	3kb mate-pair	discordant_read_pair&read_depth	1X
1	94288193	94293221	deletion	3kb mate-pair	discordant_read_pair&read_depth	1X
1	103785001	104000000	deletion	3kb mate-pair	discordant_read_pair&read_depth	1X
1	110186569	110191767	deletion	3kb mate-pair	discordant_read_pair&read_depth	1X
1	114039645	114046040	deletion	3kb mate-pair	discordant_read_pair&read_depth	1X
1	142535001	142730000	duplication	3kb mate-pair	discordant_read_pair&read_depth	1X
1	142780001	142965000	duplication	3kb mate-pair	discordant_read_pair&read_depth	1X
1	143130001	143285000	duplication	3kb mate-pair	discordant_read_pair&read_depth	1X
1	143345001	143545000	duplication	3kb mate-pair	discordant_read_pair&read_depth	1X
1	143940001	144080000	duplication	3kb mate-pair	discordant_read_pair&read_depth	1X
1	144340001	144515000	deletion	3kb mate-pair	discordant_read_pair&read_depth	1X
1	146020001	146305000	deletion	3kb mate-pair	discordant_read_pair&read_depth	1X
1	148840001	148955000	duplication	3kb mate-pair	discordant_read_pair&read_depth	1X
1	152759454	152771106	deletion	3kb mate-pair	discordant_read_pair&read_depth	1X
1	156526483	156528986	deletion	3kb mate-pair	discordant_read_pair&read_depth	1X
1	158867302	158870447	deletion	3kb mate-pair	discordant_read_pair&read_depth	1X
1	187715852	187722536	deletion	3kb mate-pair	discordant_read_pair&read_depth	1X
1	189704361	189784142	deletion	3kb mate-pair	discordant_read_pair&read_depth	1X
1	194450668	194455034	deletion	3kb mate-pair	discordant_read_pair&read_depth	1X
1	197500206	197504274	deletion	3kb mate-pair	discordant_read_pair&read_depth	1X
1	199438548	199440591	deletion	3kb mate-pair	discordant_read_pair&read_depth	1X
1	206283264	206288011	duplication	3kb mate-pair	discordant_read_pair&read_depth	1X
1	207541866	207546590	deletion	3kb mate-pair	discordant_read_pair&read_depth	1X
1	213083313	213086319	deletion	3kb mate-pair	discordant_read_pair&read_depth	1X
1	218182406	218188799	deletion	3kb mate-pair	discordant_read_pair&read_depth	1X
1	222372912	222380607	deletion	3kb mate-pair	discordant_read_pair&read_depth	1X
1	228745001	228780000	duplication	3kb mate-pair	discordant_read_pair&read_depth	1X
1	229811747	229821033	deletion	3kb mate-pair	discordant_read_pair&read_depth	1X
1	236548944	236551589	deletion	3kb mate-pair	discordant_read_pair&read_depth	1X
1	248050660	248058184	deletion	3kb mate-pair	discordant_read_pair&read_depth	1X
1	248670001	248825000	deletion	3kb mate-pair	discordant_read_pair&read_depth	1X
2	306363	309568	deletion	3kb mate-pair	discordant_read_pair&read_depth	1X
2	3732337	3738931	deletion	3kb mate-pair	discordant_read_pair&read_depth	1X
2	4781015	4787788	deletion	3kb mate-pair	discordant_read_pair&read_depth	1X
2	14703600	14711019	deletion	3kb mate-pair	discordant_read_pair&read_depth	1X
2	33140464	33143542	deletion	3kb mate-pair	discordant_read_pair&read_depth	1X
2	33224416	33228417	deletion	3kb mate-pair	discordant_read_pair&read_depth	1X
2	34523494	34525854	deletion	3kb mate-pair	discordant_read_pair&read_depth	1X
2	34694785	34736927	deletion	3kb mate-pair	discordant_read_pair&read_depth	1X
2	34796369	34802214	deletion	3kb mate-pair	discordant_read_pair&read_depth	1X
2	35975001	35995000	deletion	3kb mate-pair	discordant_read_pair&read_depth	1X
2	36215827	36220148	deletion	3kb mate-pair	discordant_read_pair&read_depth	1X
2	48781778	48785192	deletion	3kb mate-pair	discordant_read_pair&read_depth	1X
2	52749571	52785868	deletion	3kb mate-pair	discordant_read_pair&read_depth	1X
2	54565283	54569548	deletion	3kb mate-pair	discordant_read_pair&read_depth	1X
2	59623119	59631046	deletion	3kb mate-pair	discordant_read_pair&read_depth	1X
2	66505261	66507660	deletion	3kb mate-pair	discordant_read_pair&read_depth	1X
2	76526364	76528979	deletion	3kb mate-pair	discordant_read_pair&read_depth	1X
2	76773368	76775679	deletion	3kb mate-pair	discordant_read_pair&read_depth	1X
2	79076125	79082243	deletion	3kb mate-pair	discordant_read_pair&read_depth	1X
2	90370001	90505000	duplication	3kb mate-pair	discordant_read_pair&read_depth	1X
2	91710001	91950000	duplication	3kb mate-pair	discordant_read_pair&read_depth	1X
2	91970001	92160000	duplication	3kb mate-pair	discordant_read_pair&read_depth	1X
2	97860001	97915000	duplication	3kb mate-pair	discordant_read_pair&read_depth	1X
2	98140001	98165000	deletion	3kb mate-pair	discordant_read_pair&read_depth	1X
2	110680001	110735000	deletion	3kb mate-pair	discordant_read_pair&read_depth	1X
2	110985001	111030000	deletion	3kb mate-pair	discordant_read_pair&read_depth	1X
2	111150001	111200000	deletion	3kb mate-pair	discordant_read_pair&read_depth	1X
2	114151208	114156031	deletion	3kb mate-pair	discordant_read_pair&read_depth	1X
2	126442332	126452346	deletion	3kb mate-pair	discordant_read_pair&read_depth	1X
2	127674740	127678443	deletion	3kb mate-pair	discordant_read_pair&read_depth	1X
2	130242169	130252376	deletion	3kb mate-pair	discordant_read_pair&read_depth	1X
2	130954433	130957386	deletion	3kb mate-pair	discordant_read_pair&read_depth	1X
2	133671246	133674542	deletion	3kb mate-pair	discordant_read_pair&read_depth	1X
2	134966519	134970257	deletion	3kb mate-pair	discordant_read_pair&read_depth	1X
2	146865001	146880000	deletion	3kb mate-pair	discordant_read_pair&read_depth	1X
2	151031015	151038339	deletion	3kb mate-pair	discordant_read_pair&read_depth	1X
2	155818966	155830714	deletion	3kb mate-pair	discordant_read_pair&read_depth	1X
2	159958854	159961757	deletion	3kb mate-pair	discordant_read_pair&read_depth	1X
2	160148929	160151762	deletion	3kb mate-pair	discordant_read_pair&read_depth	1X
2	167494714	167500490	duplication	3kb mate-pair	discordant_read_pair&read_depth	1X
2	170103363	170111377	deletion	3kb mate-pair	discordant_read_pair&read_depth	1X
2	170641413	170644156	deletion	3kb mate-pair	discordant_read_pair&read_depth	1X
2	173178870	173186816	deletion	3kb mate-pair	discordant_read_pair&read_depth	1X
2	177264844	177272054	deletion	3kb mate-pair	discordant_read_pair&read_depth	1X
2	184084180	184091258	deletion	3kb mate-pair	discordant_read_pair&read_depth	1X
2	194689346	194699195	deletion	3kb mate-pair	discordant_read_pair&read_depth	1X
2	208350969	208360481	deletion	3kb mate-pair	discordant_read_pair&read_depth	1X
2	208474434	208476978	deletion	3kb mate-pair	discordant_read_pair&read_depth	1X
2	215728396	215730888	deletion	3kb mate-pair	discordant_read_pair&read_depth	1X
2	220051851	220056656	deletion	3kb mate-pair	discordant_read_pair&read_depth	1X
2	223760162	223763128	deletion	3kb mate-pair	discordant_read_pair&read_depth	1X
3	228490	235150	deletion	3kb mate-pair	discordant_read_pair&read_depth	1X
3	4066528	4070099	deletion	3kb mate-pair	discordant_read_pair&read_depth	1X
3	6649813	6654645	deletion	3kb mate-pair	discordant_read_pair&read_depth	1X
3	11108117	11112189	deletion	3kb mate-pair	discordant_read_pair&read_depth	1X
3	21723700	21726306	deletion	3kb mate-pair	discordant_read_pair&read_depth	1X
3	22091436	22098368	deletion	3kb mate-pair	discordant_read_pair&read_depth	1X
3	32101783	32108033	deletion	3kb mate-pair	discordant_read_pair&read_depth	1X
3	42838091	42840949	deletion	3kb mate-pair	discordant_read_pair&read_depth	1X
3	65187556	65215086	deletion	3kb mate-pair	discordant_read_pair&read_depth	1X
3	67493574	67497395	deletion	3kb mate-pair	discordant_read_pair&read_depth	1X
3	68634332	68640690	deletion	3kb mate-pair	discordant_read_pair&read_depth	1X
3	75690001	75810000	duplication	3kb mate-pair	discordant_read_pair&read_depth	1X
3	83853005	83855384	deletion	3kb mate-pair	discordant_read_pair&read_depth	1X
3	98409813	98415329	deletion	3kb mate-pair	discordant_read_pair&read_depth	1X
3	129765001	129810000	deletion	3kb mate-pair	discordant_read_pair&read_depth	1X
3	137314148	137316599	deletion	3kb mate-pair	discordant_read_pair&read_depth	1X
3	146385165	146390683	deletion	3kb mate-pair	discordant_read_pair&read_depth	1X
3	162515001	162635000	deletion	3kb mate-pair	discordant_read_pair&read_depth	1X
3	162717306	162723913	deletion	3kb mate-pair	discordant_read_pair&read_depth	1X
3	162764275	162769119	deletion	3kb mate-pair	discordant_read_pair&read_depth	1X
3	187731549	187735554	deletion	3kb mate-pair	discordant_read_pair&read_depth	1X
3	195200001	195235000	deletion	3kb mate-pair	discordant_read_pair&read_depth	1X
3	196934176	196939568	deletion	3kb mate-pair	discordant_read_pair&read_depth	1X
4	15001	70000	duplication	3kb mate-pair	discordant_read_pair&read_depth	1X
4	9155001	9215000	deletion	3kb mate-pair	discordant_read_pair&read_depth	1X
4	9455001	9485000	deletion	3kb mate-pair	discordant_read_pair&read_depth	1X
4	34683518	34688647	duplication	3kb mate-pair	discordant_read_pair&read_depth	1X
4	34779285	34829082	deletion	3kb mate-pair	discordant_read_pair&read_depth	1X
4	46055089	46058369	deletion	3kb mate-pair	discordant_read_pair&read_depth	1X
4	59944249	59951231	deletion	3kb mate-pair	discordant_read_pair&read_depth	1X
4	61939190	61943313	deletion	3kb mate-pair	discordant_read_pair&read_depth	1X
4	69365001	69490000	deletion	3kb mate-pair	discordant_read_pair&read_depth	1X
4	70120001	70235000	deletion	3kb mate-pair	discordant_read_pair&read_depth	1X
4	75642264	75649633	deletion	3kb mate-pair	discordant_read_pair&read_depth	1X
4	79269081	79275205	deletion	3kb mate-pair	discordant_read_pair&read_depth	1X
4	86976234	86980107	deletion	3kb mate-pair	discordant_read_pair&read_depth	1X
4	91596720	91602916	deletion	3kb mate-pair	discordant_read_pair&read_depth	1X
4	91931336	91936392	deletion	3kb mate-pair	discordant_read_pair&read_depth	1X
4	103872469	103875762	deletion	3kb mate-pair	discordant_read_pair&read_depth	1X
4	107604079	107609766	deletion	3kb mate-pair	discordant_read_pair&read_depth	1X
4	108127752	108132376	deletion	3kb mate-pair	discordant_read_pair&read_depth	1X
4	108276236	108279568	deletion	3kb mate-pair	discordant_read_pair&read_depth	1X
4	113497853	113501746	deletion	3kb mate-pair	discordant_read_pair&read_depth	1X
4	115928507	115932215	deletion	3kb mate-pair	discordant_read_pair&read_depth	1X
4	116166823	116177191	deletion	3kb mate-pair	discordant_read_pair&read_depth	1X
4	130065180	130068611	deletion	3kb mate-pair	discordant_read_pair&read_depth	1X
4	139468602	139473293	deletion	3kb mate-pair	discordant_read_pair&read_depth	1X
4	161878913	161885304	deletion	3kb mate-pair	discordant_read_pair&read_depth	1X
4	163393964	163396474	deletion	3kb mate-pair	discordant_read_pair&read_depth	1X
4	166002374	166005266	deletion	3kb mate-pair	discordant_read_pair&read_depth	1X
4	167676726	167684291	deletion	3kb mate-pair	discordant_read_pair&read_depth	1X
4	173424940	173433835	deletion	3kb mate-pair	discordant_read_pair&read_depth	1X
4	186441495	186444414	deletion	3kb mate-pair	discordant_read_pair&read_depth	1X
4	187092608	187099137	deletion	3kb mate-pair	discordant_read_pair&read_depth	1X
4	187352802	187358222	deletion	3kb mate-pair	discordant_read_pair&read_depth	1X
4	190057606	190064875	deletion	3kb mate-pair	discordant_read_pair&read_depth	1X
4	190470001	190685000	duplication	3kb mate-pair	discordant_read_pair&read_depth	1X
4	190605937	190610377	deletion	3kb mate-pair	discordant_read_pair&read_depth	1X
4	190770001	190980000	duplication	3kb mate-pair	discordant_read_pair&read_depth	1X
5	1177920	1181327	deletion	3kb mate-pair	discordant_read_pair&read_depth	1X
5	12809603	12821306	deletion	3kb mate-pair	discordant_read_pair&read_depth	1X
5	21449313	21452586	deletion	3kb mate-pair	discordant_read_pair&read_depth	1X
5	23902479	23905444	deletion	3kb mate-pair	discordant_read_pair&read_depth	1X
5	24369722	24373518	deletion	3kb mate-pair	discordant_read_pair&read_depth	1X
5	26796697	26801971	deletion	3kb mate-pair	discordant_read_pair&read_depth	1X
5	57322878	57333814	deletion	3kb mate-pair	discordant_read_pair&read_depth	1X
5	57679623	57686213	deletion	3kb mate-pair	discordant_read_pair&read_depth	1X
5	59999846	60004241	deletion	3kb mate-pair	discordant_read_pair&read_depth	1X
5	63697582	63701502	deletion	3kb mate-pair	discordant_read_pair&read_depth	1X
5	69675001	69780000	deletion	3kb mate-pair	discordant_read_pair&read_depth	1X
5	78109680	78112320	deletion	3kb mate-pair	discordant_read_pair&read_depth	1X
5	83947967	83955576	deletion	3kb mate-pair	discordant_read_pair&read_depth	1X
5	86115341	86117993	deletion	3kb mate-pair	discordant_read_pair&read_depth	1X
5	90499558	90502108	deletion	3kb mate-pair	discordant_read_pair&read_depth	1X
5	98343940	98347732	deletion	3kb mate-pair	discordant_read_pair&read_depth	1X
5	103853994	103860370	deletion	3kb mate-pair	discordant_read_pair&read_depth	1X
5	104430001	104500000	deletion	3kb mate-pair	discordant_read_pair&read_depth	1X
5	117386979	117394915	deletion	3kb mate-pair	discordant_read_pair&read_depth	1X
5	119379088	119382924	deletion	3kb mate-pair	discordant_read_pair&read_depth	1X
5	135100001	135145000	deletion	3kb mate-pair	discordant_read_pair&read_depth	1X
5	136853823	136856516	deletion	3kb mate-pair	discordant_read_pair&read_depth	1X
5	176387563	176390208	deletion	3kb mate-pair	discordant_read_pair&read_depth	1X
5	177195001	177215000	deletion	3kb mate-pair	discordant_read_pair&read_depth	1X
5	178108721	178114121	deletion	3kb mate-pair	discordant_read_pair&read_depth	1X
6	255001	385000	duplication	3kb mate-pair	discordant_read_pair&read_depth	1X
6	5037104	5040835	deletion	3kb mate-pair	discordant_read_pair&read_depth	1X
6	23743118	23746222	deletion	3kb mate-pair	discordant_read_pair&read_depth	1X
6	24810872	24817985	deletion	3kb mate-pair	discordant_read_pair&read_depth	1X
6	29685346	29688330	deletion	3kb mate-pair	discordant_read_pair&read_depth	1X
6	29899559	29901738	deletion	3kb mate-pair	discordant_read_pair&read_depth	1X
6	31211497	31214484	deletion	3kb mate-pair	discordant_read_pair&read_depth	1X
6	31421451	31424840	deletion	3kb mate-pair	discordant_read_pair&read_depth	1X
6	32455001	32530000	deletion	3kb mate-pair	discordant_read_pair&read_depth	1X
6	32561896	32565699	deletion	3kb mate-pair	discordant_read_pair&read_depth	1X
6	33024164	33028727	deletion	3kb mate-pair	discordant_read_pair&read_depth	1X
6	33937527	33943173	deletion	3kb mate-pair	discordant_read_pair&read_depth	1X
6	48930931	48938957	deletion	3kb mate-pair	discordant_read_pair&read_depth	1X
6	51739284	51746225	deletion	3kb mate-pair	discordant_read_pair&read_depth	1X
6	53928395	53934966	deletion	3kb mate-pair	discordant_read_pair&read_depth	1X
6	55825149	55846927	deletion	3kb mate-pair	discordant_read_pair&read_depth	1X
6	57205001	57585000	duplication	3kb mate-pair	discordant_read_pair&read_depth	1X
6	57284803	57289505	deletion	3kb mate-pair	discordant_read_pair&read_depth	1X
6	57297141	57301683	deletion	3kb mate-pair	discordant_read_pair&read_depth	1X
6	57422931	57429262	deletion	3kb mate-pair	discordant_read_pair&read_depth	1X
6	57623190	57629161	deletion	3kb mate-pair	discordant_read_pair&read_depth	1X
6	58423808	58428962	deletion	3kb mate-pair	discordant_read_pair&read_depth	1X
6	66259797	66262132	deletion	3kb mate-pair	discordant_read_pair&read_depth	1X
6	66398149	66405304	deletion	3kb mate-pair	discordant_read_pair&read_depth	1X
6	67007656	67049102	deletion	3kb mate-pair	discordant_read_pair&read_depth	1X
6	74613431	74621055	deletion	3kb mate-pair	discordant_read_pair&read_depth	1X
6	77097371	77102666	deletion	3kb mate-pair	discordant_read_pair&read_depth	1X
6	78966862	79037222	deletion	3kb mate-pair	discordant_read_pair&read_depth	1X
6	85317822	85324328	deletion	3kb mate-pair	discordant_read_pair&read_depth	1X
6	86708704	86715274	deletion	3kb mate-pair	discordant_read_pair&read_depth	1X
6	103737193	103763777	deletion	3kb mate-pair	discordant_read_pair&read_depth	1X
6	105260644	105264027	deletion	3kb mate-pair	discordant_read_pair&read_depth	1X
6	132106547	132108846	deletion	3kb mate-pair	discordant_read_pair&read_depth	1X
6	132114054	132118629	deletion	3kb mate-pair	discordant_read_pair&read_depth	1X
6	132375127	132378938	deletion	3kb mate-pair	discordant_read_pair&read_depth	1X
6	132707137	132713648	deletion	3kb mate-pair	discordant_read_pair&read_depth	1X
6	153029767	153033902	deletion	3kb mate-pair	discordant_read_pair&read_depth	1X
7	10504304	10507051	deletion	3kb mate-pair	discordant_read_pair&read_depth	1X
7	22434358	22437358	deletion	3kb mate-pair	discordant_read_pair&read_depth	1X
7	25057016	25060036	deletion	3kb mate-pair	discordant_read_pair&read_depth	1X
7	49719383	49726561	deletion	3kb mate-pair	discordant_read_pair&read_depth	1X
7	51594227	51599253	deletion	3kb mate-pair	discordant_read_pair&read_depth	1X
7	56216097	56220647	deletion	3kb mate-pair	discordant_read_pair&read_depth	1X
7	56760874	56770046	deletion	3kb mate-pair	discordant_read_pair&read_depth	1X
7	57605001	57780000	duplication	3kb mate-pair	discordant_read_pair&read_depth	1X
7	64315688	64318308	deletion	3kb mate-pair	discordant_read_pair&read_depth	1X
7	65857128	65860272	deletion	3kb mate-pair	discordant_read_pair&read_depth	1X
7	73827932	73831462	deletion	3kb mate-pair	discordant_read_pair&read_depth	1X
7	74715001	74930000	deletion	3kb mate-pair	discordant_read_pair&read_depth	1X
7	89810277	89812872	deletion	3kb mate-pair	discordant_read_pair&read_depth	1X
7	93416447	93423304	deletion	3kb mate-pair	discordant_read_pair&read_depth	1X
7	96475738	96481999	deletion	3kb mate-pair	discordant_read_pair&read_depth	1X
7	96543271	96547610	deletion	3kb mate-pair	discordant_read_pair&read_depth	1X
7	97393374	97402726	deletion	3kb mate-pair	discordant_read_pair&read_depth	1X
7	101285001	101335000	deletion	3kb mate-pair	discordant_read_pair&read_depth	1X
7	102200001	102280000	duplication	3kb mate-pair	discordant_read_pair&read_depth	1X
7	110180855	110188446	deletion	3kb mate-pair	discordant_read_pair&read_depth	1X
7	113416071	113422278	deletion	3kb mate-pair	discordant_read_pair&read_depth	1X
7	126045892	126051942	deletion	3kb mate-pair	discordant_read_pair&read_depth	1X
7	141770001	141795000	deletion	3kb mate-pair	discordant_read_pair&read_depth	1X
7	143285001	143400000	deletion	3kb mate-pair	discordant_read_pair&read_depth	1X
7	148072775	148077520	deletion	3kb mate-pair	discordant_read_pair&read_depth	1X
7	152280597	152284308	deletion	3kb mate-pair	discordant_read_pair&read_depth	1X
7	156386875	156394437	deletion	3kb mate-pair	discordant_read_pair&read_depth	1X
8	594072	600012	deletion	3kb mate-pair	discordant_read_pair&read_depth	1X
8	4122784	4125003	deletion	3kb mate-pair	discordant_read_pair&read_depth	1X
8	7035001	7115000	deletion	3kb mate-pair	discordant_read_pair&read_depth	1X
8	11895001	11975000	deletion	3kb mate-pair	discordant_read_pair&read_depth	1X
8	12065001	12250000	deletion	3kb mate-pair	discordant_read_pair&read_depth	1X
8	12350001	12460000	duplication	3kb mate-pair	discordant_read_pair&read_depth	1X
8	25066071	25071070	deletion	3kb mate-pair	discordant_read_pair&read_depth	1X
8	32679746	32691889	deletion	3kb mate-pair	discordant_read_pair&read_depth	1X
8	39235001	39380000	deletion	3kb mate-pair	discordant_read_pair&read_depth	1X
8	39885166	39891002	deletion	3kb mate-pair	discordant_read_pair&read_depth	1X
8	40774563	40779861	deletion	3kb mate-pair	discordant_read_pair&read_depth	1X
8	42190294	42194448	deletion	3kb mate-pair	discordant_read_pair&read_depth	1X
8	75362819	75366987	deletion	3kb mate-pair	discordant_read_pair&read_depth	1X
8	86725001	86840000	duplication	3kb mate-pair	discordant_read_pair&read_depth	1X
8	94071850	94077748	deletion	3kb mate-pair	discordant_read_pair&read_depth	1X
8	103994493	103997047	deletion	3kb mate-pair	discordant_read_pair&read_depth	1X
8	112293795	112297153	deletion	3kb mate-pair	discordant_read_pair&read_depth	1X
8	120154547	120161434	deletion	3kb mate-pair	discordant_read_pair&read_depth	1X
8	126595070	126601723	deletion	3kb mate-pair	discordant_read_pair&read_depth	1X
8	129464844	129472118	deletion	3kb mate-pair	discordant_read_pair&read_depth	1X
8	131849824	131853991	deletion	3kb mate-pair	discordant_read_pair&read_depth	1X
8	135082233	135089716	deletion	3kb mate-pair	discordant_read_pair&read_depth	1X
8	137159291	137164183	deletion	3kb mate-pair	discordant_read_pair&read_depth	1X
8	144700483	144714980	deletion	3kb mate-pair	discordant_read_pair&read_depth	1X
8	145290001	145515000	deletion	3kb mate-pair	discordant_read_pair&read_depth	1X
9	17908239	17913671	deletion	3kb mate-pair	discordant_read_pair&read_depth	1X
9	22495660	22504565	deletion	3kb mate-pair	discordant_read_pair&read_depth	1X
9	23362754	23378250	deletion	3kb mate-pair	discordant_read_pair&read_depth	1X
9	39095001	39185000	duplication	3kb mate-pair	discordant_read_pair&read_depth	1X
9	41095001	41230000	deletion	3kb mate-pair	discordant_read_pair&read_depth	1X
9	42460001	42545000	duplication	3kb mate-pair	discordant_read_pair&read_depth	1X
9	42875001	43170000	duplication	3kb mate-pair	discordant_read_pair&read_depth	1X
9	43925001	44060000	deletion	3kb mate-pair	discordant_read_pair&read_depth	1X
9	44240001	44280000	deletion	3kb mate-pair	discordant_read_pair&read_depth	1X
9	44470001	44545000	deletion	3kb mate-pair	discordant_read_pair&read_depth	1X
9	44625001	44735000	deletion	3kb mate-pair	discordant_read_pair&read_depth	1X
9	46660001	46910000	duplication	3kb mate-pair	discordant_read_pair&read_depth	1X
9	46960001	47160000	deletion	3kb mate-pair	discordant_read_pair&read_depth	1X
9	66065001	66245000	deletion	3kb mate-pair	discordant_read_pair&read_depth	1X
9	66345001	66455000	deletion	3kb mate-pair	discordant_read_pair&read_depth	1X
9	66455001	66585000	duplication	3kb mate-pair	discordant_read_pair&read_depth	1X
9	68350001	68510000	duplication	3kb mate-pair	discordant_read_pair&read_depth	1X
9	68990001	69090000	duplication	3kb mate-pair	discordant_read_pair&read_depth	1X
9	70560001	70635000	duplication	3kb mate-pair	discordant_read_pair&read_depth	1X
9	70840001	70925000	duplication	3kb mate-pair	discordant_read_pair&read_depth	1X
9	71738088	71743506	deletion	3kb mate-pair	discordant_read_pair&read_depth	1X
9	73320001	73350000	deletion	3kb mate-pair	discordant_read_pair&read_depth	1X
9	78919394	78922092	deletion	3kb mate-pair	discordant_read_pair&read_depth	1X
9	79770022	79777408	duplication	3kb mate-pair	discordant_read_pair&read_depth	1X
9	83967691	83970793	deletion	3kb mate-pair	discordant_read_pair&read_depth	1X
9	84323891	84327574	deletion	3kb mate-pair	discordant_read_pair&read_depth	1X
9	90858817	90861177	deletion	3kb mate-pair	discordant_read_pair&read_depth	1X
9	96498808	96504148	deletion	3kb mate-pair	discordant_read_pair&read_depth	1X
9	101308994	101313080	deletion	3kb mate-pair	discordant_read_pair&read_depth	1X
9	104714541	104724548	deletion	3kb mate-pair	discordant_read_pair&read_depth	1X
9	110032861	110035632	deletion	3kb mate-pair	discordant_read_pair&read_depth	1X
9	110537509	110540909	deletion	3kb mate-pair	discordant_read_pair&read_depth	1X
9	131411965	131414009	deletion	3kb mate-pair	discordant_read_pair&read_depth	1X
9	133030644	133036513	deletion	3kb mate-pair	discordant_read_pair&read_depth	1X
9	140253215	140256516	deletion	3kb mate-pair	discordant_read_pair&read_depth	1X
10	4289789	4291698	deletion	3kb mate-pair	discordant_read_pair&read_depth	1X
10	4708458	4710750	deletion	3kb mate-pair	discordant_read_pair&read_depth	1X
10	6410559	6418534	deletion	3kb mate-pair	discordant_read_pair&read_depth	1X
10	31245484	31252458	deletion	3kb mate-pair	discordant_read_pair&read_depth	1X
10	32256926	32261621	deletion	3kb mate-pair	discordant_read_pair&read_depth	1X
10	42605001	42835000	duplication	3kb mate-pair	discordant_read_pair&read_depth	1X
10	42700016	42717549	deletion	3kb mate-pair	discordant_read_pair&read_depth	1X
10	46945001	47150000	duplication	3kb mate-pair	discordant_read_pair&read_depth	1X
10	47750001	47955000	deletion	3kb mate-pair	discordant_read_pair&read_depth	1X
10	48010001	48300000	deletion	3kb mate-pair	discordant_read_pair&read_depth	1X
10	51640001	51720000	deletion	3kb mate-pair	discordant_read_pair&read_depth	1X
10	51905001	52015000	deletion	3kb mate-pair	discordant_read_pair&read_depth	1X
10	53203576	53214671	deletion	3kb mate-pair	discordant_read_pair&read_depth	1X
10	59209599	59212696	deletion	3kb mate-pair	discordant_read_pair&read_depth	1X
10	65508228	65511467	deletion	3kb mate-pair	discordant_read_pair&read_depth	1X
10	71280690	71291898	deletion	3kb mate-pair	discordant_read_pair&read_depth	1X
10	78255454	78261411	deletion	3kb mate-pair	discordant_read_pair&read_depth	1X
10	90794989	90801026	duplication	3kb mate-pair	discordant_read_pair&read_depth	1X
10	99034758	99038164	deletion	3kb mate-pair	discordant_read_pair&read_depth	1X
10	108029957	108032631	deletion	3kb mate-pair	discordant_read_pair&read_depth	1X
10	111571451	111578738	deletion	3kb mate-pair	discordant_read_pair&read_depth	1X
10	114111906	114117859	deletion	3kb mate-pair	discordant_read_pair&read_depth	1X
10	122226170	122229245	deletion	3kb mate-pair	discordant_read_pair&read_depth	1X
10	132988166	132991614	deletion	3kb mate-pair	discordant_read_pair&read_depth	1X
10	135440001	135525000	duplication	3kb mate-pair	discordant_read_pair&read_depth	1X
11	1915141	1937530	deletion	3kb mate-pair	discordant_read_pair&read_depth	1X
11	3270001	3360000	deletion	3kb mate-pair	discordant_read_pair&read_depth	1X
11	4245001	4335000	deletion	3kb mate-pair	discordant_read_pair&read_depth	1X
11	5759261	5764171	deletion	3kb mate-pair	discordant_read_pair&read_depth	1X
11	22470490	22473632	deletion	3kb mate-pair	discordant_read_pair&read_depth	1X
11	29006542	29012942	deletion	3kb mate-pair	discordant_read_pair&read_depth	1X
11	31393699	31399844	deletion	3kb mate-pair	discordant_read_pair&read_depth	1X
11	47057316	47063913	deletion	3kb mate-pair	discordant_read_pair&read_depth	1X
11	48600612	48604380	deletion	3kb mate-pair	discordant_read_pair&read_depth	1X
11	55360001	55460000	deletion	3kb mate-pair	discordant_read_pair&read_depth	1X
11	81855308	81863975	deletion	3kb mate-pair	discordant_read_pair&read_depth	1X
11	89475001	89550000	duplication	3kb mate-pair	discordant_read_pair&read_depth	1X
11	92869717	92876338	deletion	3kb mate-pair	discordant_read_pair&read_depth	1X
11	93968946	93972071	duplication	3kb mate-pair	discordant_read_pair&read_depth	1X
11	95168929	95175994	deletion	3kb mate-pair	discordant_read_pair&read_depth	1X
11	101564826	101575591	deletion	3kb mate-pair	discordant_read_pair&read_depth	1X
11	102750922	102753081	deletion	3kb mate-pair	discordant_read_pair&read_depth	1X
11	104267665	104273852	deletion	3kb mate-pair	discordant_read_pair&read_depth	1X
11	122346598	122350043	deletion	3kb mate-pair	discordant_read_pair&read_depth	1X
12	8560001	8590000	deletion	3kb mate-pair	discordant_read_pair&read_depth	1X
12	9635001	9735000	deletion	3kb mate-pair	discordant_read_pair&read_depth	1X
12	11505001	11545000	deletion	3kb mate-pair	discordant_read_pair&read_depth	1X
12	43977433	43979855	deletion	3kb mate-pair	discordant_read_pair&read_depth	1X
12	45902308	45910426	deletion	3kb mate-pair	discordant_read_pair&read_depth	1X
12	48707382	48711416	deletion	3kb mate-pair	discordant_read_pair&read_depth	1X
12	48724830	48729314	deletion	3kb mate-pair	discordant_read_pair&read_depth	1X
12	70594776	70598418	deletion	3kb mate-pair	discordant_read_pair&read_depth	1X
12	71601978	71605812	deletion	3kb mate-pair	discordant_read_pair&read_depth	1X
12	80155556	80161716	duplication	3kb mate-pair	discordant_read_pair&read_depth	1X
12	84592908	84596748	deletion	3kb mate-pair	discordant_read_pair&read_depth	1X
12	96009556	96012457	deletion	3kb mate-pair	discordant_read_pair&read_depth	1X
12	98669743	98673888	deletion	3kb mate-pair	discordant_read_pair&read_depth	1X
12	98954814	98959582	deletion	3kb mate-pair	discordant_read_pair&read_depth	1X
12	99793945	99802767	deletion	3kb mate-pair	discordant_read_pair&read_depth	1X
12	100287635	100292166	deletion	3kb mate-pair	discordant_read_pair&read_depth	1X
12	102102371	102108084	deletion	3kb mate-pair	discordant_read_pair&read_depth	1X
13	23632136	23637843	deletion	3kb mate-pair	discordant_read_pair&read_depth	1X
13	31703051	31706035	deletion	3kb mate-pair	discordant_read_pair&read_depth	1X
13	39056296	39060280	deletion	3kb mate-pair	discordant_read_pair&read_depth	1X
13	51069162	51075224	deletion	3kb mate-pair	discordant_read_pair&read_depth	1X
13	72476635	72480675	deletion	3kb mate-pair	discordant_read_pair&read_depth	1X
13	72807380	72812360	deletion	3kb mate-pair	discordant_read_pair&read_depth	1X
13	72842853	72847434	deletion	3kb mate-pair	discordant_read_pair&read_depth	1X
13	83165794	83172761	deletion	3kb mate-pair	discordant_read_pair&read_depth	1X
13	101893821	101896608	deletion	3kb mate-pair	discordant_read_pair&read_depth	1X
14	19000001	19125000	duplication	3kb mate-pair	discordant_read_pair&read_depth	1X
14	21951948	21955046	deletion	3kb mate-pair	discordant_read_pair&read_depth	1X
14	23104500	23109630	deletion	3kb mate-pair	discordant_read_pair&read_depth	1X
14	40609567	40617927	deletion	3kb mate-pair	discordant_read_pair&read_depth	1X
14	60340847	60343586	deletion	3kb mate-pair	discordant_read_pair&read_depth	1X
14	65359430	65364147	deletion	3kb mate-pair	discordant_read_pair&read_depth	1X
14	70687666	70689633	deletion	3kb mate-pair	discordant_read_pair&read_depth	1X
14	74239590	74247241	deletion	3kb mate-pair	discordant_read_pair&read_depth	1X
14	80105690	80115234	deletion	3kb mate-pair	discordant_read_pair&read_depth	1X
14	82498964	82503508	deletion	3kb mate-pair	discordant_read_pair&read_depth	1X
14	105576661	105579777	deletion	3kb mate-pair	discordant_read_pair&read_depth	1X
15	20000001	20150000	duplication	3kb mate-pair	discordant_read_pair&read_depth	1X
15	20395001	20630000	duplication	3kb mate-pair	discordant_read_pair&read_depth	1X
15	20635001	20845000	deletion	3kb mate-pair	discordant_read_pair&read_depth	1X
15	22180001	22295000	deletion	3kb mate-pair	discordant_read_pair&read_depth	1X
15	55216833	55224534	deletion	3kb mate-pair	discordant_read_pair&read_depth	1X
15	68425994	68429204	deletion	3kb mate-pair	discordant_read_pair&read_depth	1X
15	71708123	71713791	deletion	3kb mate-pair	discordant_read_pair&read_depth	1X
15	72385874	72389002	deletion	3kb mate-pair	discordant_read_pair&read_depth	1X
15	76884123	76897466	deletion	3kb mate-pair	discordant_read_pair&read_depth	1X
15	82565611	82567884	deletion	3kb mate-pair	discordant_read_pair&read_depth	1X
15	83549945	83558039	deletion	3kb mate-pair	discordant_read_pair&read_depth	1X
16	15040001	15125000	duplication	3kb mate-pair	discordant_read_pair&read_depth	1X
16	18832216	18838674	deletion	3kb mate-pair	discordant_read_pair&read_depth	1X
16	21515001	21595000	duplication	3kb mate-pair	discordant_read_pair&read_depth	1X
16	22550001	22715000	duplication	3kb mate-pair	discordant_read_pair&read_depth	1X
16	23047287	23050350	deletion	3kb mate-pair	discordant_read_pair&read_depth	1X
16	34465001	34755000	duplication	3kb mate-pair	discordant_read_pair&read_depth	1X
16	76538664	76544101	deletion	3kb mate-pair	discordant_read_pair&read_depth	1X
17	193496	197338	deletion	3kb mate-pair	discordant_read_pair&read_depth	1X
17	12352258	12359406	deletion	3kb mate-pair	discordant_read_pair&read_depth	1X
17	25265001	25310000	duplication	3kb mate-pair	discordant_read_pair&read_depth	1X
17	25536506	25541350	deletion	3kb mate-pair	discordant_read_pair&read_depth	1X
17	34505001	34575000	deletion	3kb mate-pair	discordant_read_pair&read_depth	1X
17	34590001	34725000	deletion	3kb mate-pair	discordant_read_pair&read_depth	1X
17	36285001	36410000	duplication	3kb mate-pair	discordant_read_pair&read_depth	1X
17	39421769	39432975	deletion	3kb mate-pair	discordant_read_pair&read_depth	1X
17	41436293	41440502	deletion	3kb mate-pair	discordant_read_pair&read_depth	1X
17	41437015	41441692	duplication	3kb mate-pair	discordant_read_pair&read_depth	1X
17	44650001	44780000	deletion	3kb mate-pair	discordant_read_pair&read_depth	1X
17	51852301	51860835	deletion	3kb mate-pair	discordant_read_pair&read_depth	1X
18	38259852	38266984	deletion	3kb mate-pair	discordant_read_pair&read_depth	1X
18	38864402	38868472	deletion	3kb mate-pair	discordant_read_pair&read_depth	1X
18	47694487	47699043	deletion	3kb mate-pair	discordant_read_pair&read_depth	1X
18	51952942	51957623	deletion	3kb mate-pair	discordant_read_pair&read_depth	1X
18	54945877	54949215	deletion	3kb mate-pair	discordant_read_pair&read_depth	1X
18	63766016	63770453	deletion	3kb mate-pair	discordant_read_pair&read_depth	1X
19	8340001	8365000	deletion	3kb mate-pair	discordant_read_pair&read_depth	1X
19	12693541	12698982	deletion	3kb mate-pair	discordant_read_pair&read_depth	1X
19	15046229	15050135	deletion	3kb mate-pair	discordant_read_pair&read_depth	1X
19	20505001	20720000	deletion	3kb mate-pair	discordant_read_pair&read_depth	1X
19	21902577	21907269	deletion	3kb mate-pair	discordant_read_pair&read_depth	1X
19	29949722	29957811	deletion	3kb mate-pair	discordant_read_pair&read_depth	1X
19	30388627	30393263	deletion	3kb mate-pair	discordant_read_pair&read_depth	1X
19	31287432	31289806	deletion	3kb mate-pair	discordant_read_pair&read_depth	1X
19	35660908	35665987	deletion	3kb mate-pair	discordant_read_pair&read_depth	1X
19	53422058	53424308	deletion	3kb mate-pair	discordant_read_pair&read_depth	1X
19	53688823	53692097	deletion	3kb mate-pair	discordant_read_pair&read_depth	1X
20	2802852	2807084	deletion	3kb mate-pair	discordant_read_pair&read_depth	1X
20	25855001	25950000	duplication	3kb mate-pair	discordant_read_pair&read_depth	1X
20	26050001	26150000	duplication	3kb mate-pair	discordant_read_pair&read_depth	1X
20	29420001	29520000	duplication	3kb mate-pair	discordant_read_pair&read_depth	1X
20	29580001	29655000	duplication	3kb mate-pair	discordant_read_pair&read_depth	1X
20	31524954	31529410	deletion	3kb mate-pair	discordant_read_pair&read_depth	1X
20	32814786	32819453	deletion	3kb mate-pair	discordant_read_pair&read_depth	1X
20	52646598	52659437	deletion	3kb mate-pair	discordant_read_pair&read_depth	1X
20	54434460	54441965	deletion	3kb mate-pair	discordant_read_pair&read_depth	1X
21	9410001	9595000	duplication	3kb mate-pair	discordant_read_pair&read_depth	1X
21	9825001	10035000	duplication	3kb mate-pair	discordant_read_pair&read_depth	1X
21	10085001	10215000	duplication	3kb mate-pair	discordant_read_pair&read_depth	1X
21	10365001	10645000	duplication	3kb mate-pair	discordant_read_pair&read_depth	1X
21	11089556	11092737	deletion	3kb mate-pair	discordant_read_pair&read_depth	1X
21	11096054	11108531	deletion	3kb mate-pair	discordant_read_pair&read_depth	1X
21	14335001	14445000	duplication	3kb mate-pair	discordant_read_pair&read_depth	1X
21	44970125	44973803	deletion	3kb mate-pair	discordant_read_pair&read_depth	1X
22	16850001	16960000	duplication	3kb mate-pair	discordant_read_pair&read_depth	1X
22	17770158	17779321	deletion	3kb mate-pair	discordant_read_pair&read_depth	1X
22	21580001	21660000	duplication	3kb mate-pair	discordant_read_pair&read_depth	1X
22	21815001	21895000	deletion	3kb mate-pair	discordant_read_pair&read_depth	1X
22	22380001	23245000	deletion	3kb mate-pair	discordant_read_pair&read_depth	1X
22	24195917	24198593	deletion	3kb mate-pair	discordant_read_pair&read_depth	1X
22	24274137	24311512	deletion	3kb mate-pair	discordant_read_pair&read_depth	1X
22	37143061	37148118	deletion	3kb mate-pair	discordant_read_pair&read_depth	1X
X	1035001	1205000	deletion	3kb mate-pair	discordant_read_pair&read_depth	1X
X	5055014	5058150	deletion	3kb mate-pair	discordant_read_pair&read_depth	1X
X	11724479	11731670	deletion	3kb mate-pair	discordant_read_pair&read_depth	1X
X	32986183	32989433	deletion	3kb mate-pair	discordant_read_pair&read_depth	1X
X	67123411	67130665	deletion	3kb mate-pair	discordant_read_pair&read_depth	1X
X	77120912	77125023	deletion	3kb mate-pair	discordant_read_pair&read_depth	1X
X	78920230	78926133	deletion	3kb mate-pair	discordant_read_pair&read_depth	1X
X	81096225	81103169	deletion	3kb mate-pair	discordant_read_pair&read_depth	1X
X	81982128	81988462	deletion	3kb mate-pair	discordant_read_pair&read_depth	1X
X	85604506	85610131	deletion	3kb mate-pair	discordant_read_pair&read_depth	1X
X	95312778	95320245	deletion	3kb mate-pair	discordant_read_pair&read_depth	1X
X	101056149	101067384	duplication	3kb mate-pair	discordant_read_pair&read_depth	1X
X	120010001	120130000	deletion	3kb mate-pair	discordant_read_pair&read_depth	1X
X	144421677	144424523	deletion	3kb mate-pair	discordant_read_pair&read_depth	1X
X	150292679	150295767	deletion	3kb mate-pair	discordant_read_pair&read_depth	1X
X	152230001	152340000	deletion	3kb mate-pair	discordant_read_pair&read_depth	1X
X	154790054	154804035	deletion	3kb mate-pair	discordant_read_pair&read_depth	1X

## Sheet: 3X 3kb mate-pair
Chr	Start	End	Type	Library	Detection	Coverage
1	75001	95000	deletion	3kb mate-pair	discordant_read_pair&read_depth	3X
1	175001	320000	deletion	3kb mate-pair	discordant_read_pair&read_depth	3X
1	1220001	1235000	deletion	3kb mate-pair	discordant_read_pair&read_depth	3X
1	11051509	11054538	duplication	3kb mate-pair	discordant_read_pair&read_depth	3X
1	13015001	13165000	deletion	3kb mate-pair	discordant_read_pair&read_depth	3X
1	13475001	13770000	deletion	3kb mate-pair	discordant_read_pair&read_depth	3X
1	16151652	16155853	deletion	3kb mate-pair	discordant_read_pair&read_depth	3X
1	16825001	17125000	duplication	3kb mate-pair	discordant_read_pair&read_depth	3X
1	16945428	16948221	deletion	3kb mate-pair	discordant_read_pair&read_depth	3X
1	25158696	25161586	deletion	3kb mate-pair	discordant_read_pair&read_depth	3X
1	25595001	25660000	deletion	3kb mate-pair	discordant_read_pair&read_depth	3X
1	35101279	35112090	deletion	3kb mate-pair	discordant_read_pair&read_depth	3X
1	39998036	40001592	deletion	3kb mate-pair	discordant_read_pair&read_depth	3X
1	53560001	53570000	deletion	3kb mate-pair	discordant_read_pair&read_depth	3X
1	56125001	56135000	deletion	3kb mate-pair	discordant_read_pair&read_depth	3X
1	56831074	56834973	deletion	3kb mate-pair	discordant_read_pair&read_depth	3X
1	63705326	63708336	deletion	3kb mate-pair	discordant_read_pair&read_depth	3X
1	66024086	66030322	deletion	3kb mate-pair	discordant_read_pair&read_depth	3X
1	72766200	72811988	deletion	3kb mate-pair	discordant_read_pair&read_depth	3X
1	81402871	81411138	deletion	3kb mate-pair	discordant_read_pair&read_depth	3X
1	83125322	83127877	deletion	3kb mate-pair	discordant_read_pair&read_depth	3X
1	84517762	84525601	deletion	3kb mate-pair	discordant_read_pair&read_depth	3X
1	89475577	89478640	deletion	3kb mate-pair	discordant_read_pair&read_depth	3X
1	94288193	94291326	deletion	3kb mate-pair	discordant_read_pair&read_depth	3X
1	103785001	104000000	deletion	3kb mate-pair	discordant_read_pair&read_depth	3X
1	106486760	106490708	duplication	3kb mate-pair	discordant_read_pair&read_depth	3X
1	108732732	108737329	deletion	3kb mate-pair	discordant_read_pair&read_depth	3X
1	109572994	109575547	deletion	3kb mate-pair	discordant_read_pair&read_depth	3X
1	110186705	110191490	deletion	3kb mate-pair	discordant_read_pair&read_depth	3X
1	110225001	110240000	deletion	3kb mate-pair	discordant_read_pair&read_depth	3X
1	112835048	112838336	deletion	3kb mate-pair	discordant_read_pair&read_depth	3X
1	114039825	114046040	deletion	3kb mate-pair	discordant_read_pair&read_depth	3X
1	116229424	116233199	deletion	3kb mate-pair	discordant_read_pair&read_depth	3X
1	142535001	142730000	duplication	3kb mate-pair	discordant_read_pair&read_depth	3X
1	142780001	142965000	duplication	3kb mate-pair	discordant_read_pair&read_depth	3X
1	143115001	143285000	duplication	3kb mate-pair	discordant_read_pair&read_depth	3X
1	143345001	143545000	duplication	3kb mate-pair	discordant_read_pair&read_depth	3X
1	144340001	144490000	deletion	3kb mate-pair	discordant_read_pair&read_depth	3X
1	146165001	146305000	deletion	3kb mate-pair	discordant_read_pair&read_depth	3X
1	148840001	148955000	duplication	3kb mate-pair	discordant_read_pair&read_depth	3X
1	149460001	149645000	deletion	3kb mate-pair	discordant_read_pair&read_depth	3X
1	152555001	152590000	deletion	3kb mate-pair	discordant_read_pair&read_depth	3X
1	152759979	152771106	deletion	3kb mate-pair	discordant_read_pair&read_depth	3X
1	156526651	156528986	deletion	3kb mate-pair	discordant_read_pair&read_depth	3X
1	158867528	158870069	deletion	3kb mate-pair	discordant_read_pair&read_depth	3X
1	158960624	158966304	deletion	3kb mate-pair	discordant_read_pair&read_depth	3X
1	180749683	180755443	deletion	3kb mate-pair	discordant_read_pair&read_depth	3X
1	184814557	184821762	deletion	3kb mate-pair	discordant_read_pair&read_depth	3X
1	185008949	185012159	deletion	3kb mate-pair	discordant_read_pair&read_depth	3X
1	187716002	187722536	deletion	3kb mate-pair	discordant_read_pair&read_depth	3X
1	189704361	189783634	deletion	3kb mate-pair	discordant_read_pair&read_depth	3X
1	194451056	194454513	deletion	3kb mate-pair	discordant_read_pair&read_depth	3X
1	197500494	197503261	deletion	3kb mate-pair	discordant_read_pair&read_depth	3X
1	199438548	199440591	deletion	3kb mate-pair	discordant_read_pair&read_depth	3X
1	206283062	206288466	duplication	3kb mate-pair	discordant_read_pair&read_depth	3X
1	207541866	207545729	deletion	3kb mate-pair	discordant_read_pair&read_depth	3X
1	207700001	207745000	deletion	3kb mate-pair	discordant_read_pair&read_depth	3X
1	213083313	213086319	deletion	3kb mate-pair	discordant_read_pair&read_depth	3X
1	218182488	218188732	deletion	3kb mate-pair	discordant_read_pair&read_depth	3X
1	222373756	222380607	deletion	3kb mate-pair	discordant_read_pair&read_depth	3X
1	229812441	229821033	deletion	3kb mate-pair	discordant_read_pair&read_depth	3X
1	236548944	236551339	deletion	3kb mate-pair	discordant_read_pair&read_depth	3X
1	246682799	246685450	deletion	3kb mate-pair	discordant_read_pair&read_depth	3X
1	247850439	247856514	deletion	3kb mate-pair	discordant_read_pair&read_depth	3X
1	248051042	248057691	deletion	3kb mate-pair	discordant_read_pair&read_depth	3X
1	248675001	248820000	deletion	3kb mate-pair	discordant_read_pair&read_depth	3X
2	1525001	1545000	deletion	3kb mate-pair	discordant_read_pair&read_depth	3X
2	3732731	3738246	deletion	3kb mate-pair	discordant_read_pair&read_depth	3X
2	4212597	4224001	deletion	3kb mate-pair	discordant_read_pair&read_depth	3X
2	4781199	4787451	deletion	3kb mate-pair	discordant_read_pair&read_depth	3X
2	14704063	14710154	deletion	3kb mate-pair	discordant_read_pair&read_depth	3X
2	16271572	16274195	deletion	3kb mate-pair	discordant_read_pair&read_depth	3X
2	19190001	19225000	deletion	3kb mate-pair	discordant_read_pair&read_depth	3X
2	33140906	33143542	deletion	3kb mate-pair	discordant_read_pair&read_depth	3X
2	33224416	33227468	deletion	3kb mate-pair	discordant_read_pair&read_depth	3X
2	34523494	34525752	deletion	3kb mate-pair	discordant_read_pair&read_depth	3X
2	34695228	34736724	deletion	3kb mate-pair	discordant_read_pair&read_depth	3X
2	34797140	34801948	deletion	3kb mate-pair	discordant_read_pair&read_depth	3X
2	35974811	35997347	deletion	3kb mate-pair	discordant_read_pair&read_depth	3X
2	36216289	36219880	deletion	3kb mate-pair	discordant_read_pair&read_depth	3X
2	41973143	41976042	deletion	3kb mate-pair	discordant_read_pair&read_depth	3X
2	48781778	48784867	deletion	3kb mate-pair	discordant_read_pair&read_depth	3X
2	52749578	52785328	deletion	3kb mate-pair	discordant_read_pair&read_depth	3X
2	54565338	54567585	deletion	3kb mate-pair	discordant_read_pair&read_depth	3X
2	59623119	59631046	deletion	3kb mate-pair	discordant_read_pair&read_depth	3X
2	66505261	66507660	deletion	3kb mate-pair	discordant_read_pair&read_depth	3X
2	76526455	76528918	deletion	3kb mate-pair	discordant_read_pair&read_depth	3X
2	76773413	76775614	deletion	3kb mate-pair	discordant_read_pair&read_depth	3X
2	79076408	79081379	deletion	3kb mate-pair	discordant_read_pair&read_depth	3X
2	87625001	87750000	deletion	3kb mate-pair	discordant_read_pair&read_depth	3X
2	90370001	90505000	duplication	3kb mate-pair	discordant_read_pair&read_depth	3X
2	97860001	97930000	duplication	3kb mate-pair	discordant_read_pair&read_depth	3X
2	97869778	97874739	deletion	3kb mate-pair	discordant_read_pair&read_depth	3X
2	98135001	98165000	deletion	3kb mate-pair	discordant_read_pair&read_depth	3X
2	109689824	109695463	deletion	3kb mate-pair	discordant_read_pair&read_depth	3X
2	110680001	110735000	deletion	3kb mate-pair	discordant_read_pair&read_depth	3X
2	110985001	111030000	deletion	3kb mate-pair	discordant_read_pair&read_depth	3X
2	111150001	111200000	deletion	3kb mate-pair	discordant_read_pair&read_depth	3X
2	126442946	126452040	deletion	3kb mate-pair	discordant_read_pair&read_depth	3X
2	127674740	127677308	deletion	3kb mate-pair	discordant_read_pair&read_depth	3X
2	130242169	130251676	deletion	3kb mate-pair	discordant_read_pair&read_depth	3X
2	130954433	130957386	deletion	3kb mate-pair	discordant_read_pair&read_depth	3X
2	131225001	131325000	deletion	3kb mate-pair	discordant_read_pair&read_depth	3X
2	131325001	131410000	duplication	3kb mate-pair	discordant_read_pair&read_depth	3X
2	133671369	133674542	deletion	3kb mate-pair	discordant_read_pair&read_depth	3X
2	134966519	134970182	deletion	3kb mate-pair	discordant_read_pair&read_depth	3X
2	146862609	146876866	deletion	3kb mate-pair	discordant_read_pair&read_depth	3X
2	151031015	151038339	deletion	3kb mate-pair	discordant_read_pair&read_depth	3X
2	155818966	155830340	deletion	3kb mate-pair	discordant_read_pair&read_depth	3X
2	159958854	159961757	deletion	3kb mate-pair	discordant_read_pair&read_depth	3X
2	160149116	160151716	deletion	3kb mate-pair	discordant_read_pair&read_depth	3X
2	167494641	167501269	duplication	3kb mate-pair	discordant_read_pair&read_depth	3X
2	170104615	170111167	deletion	3kb mate-pair	discordant_read_pair&read_depth	3X
2	170641413	170644156	deletion	3kb mate-pair	discordant_read_pair&read_depth	3X
2	173179797	173186818	deletion	3kb mate-pair	discordant_read_pair&read_depth	3X
2	177265520	177272054	deletion	3kb mate-pair	discordant_read_pair&read_depth	3X
2	180065372	180082033	deletion	3kb mate-pair	discordant_read_pair&read_depth	3X
2	184085517	184091049	deletion	3kb mate-pair	discordant_read_pair&read_depth	3X
2	194689490	194698810	deletion	3kb mate-pair	discordant_read_pair&read_depth	3X
2	204181603	204191717	deletion	3kb mate-pair	discordant_read_pair&read_depth	3X
2	208350969	208359597	deletion	3kb mate-pair	discordant_read_pair&read_depth	3X
2	208474445	208476895	deletion	3kb mate-pair	discordant_read_pair&read_depth	3X
2	209942758	209949099	deletion	3kb mate-pair	discordant_read_pair&read_depth	3X
2	215728396	215730888	deletion	3kb mate-pair	discordant_read_pair&read_depth	3X
2	217089790	217092565	deletion	3kb mate-pair	discordant_read_pair&read_depth	3X
2	220052335	220056656	deletion	3kb mate-pair	discordant_read_pair&read_depth	3X
2	223760162	223762693	deletion	3kb mate-pair	discordant_read_pair&read_depth	3X
2	232690001	232715000	deletion	3kb mate-pair	discordant_read_pair&read_depth	3X
3	228783	234534	deletion	3kb mate-pair	discordant_read_pair&read_depth	3X
3	4066528	4069604	deletion	3kb mate-pair	discordant_read_pair&read_depth	3X
3	6649813	6654645	deletion	3kb mate-pair	discordant_read_pair&read_depth	3X
3	11108117	11112152	deletion	3kb mate-pair	discordant_read_pair&read_depth	3X
3	21723700	21726306	deletion	3kb mate-pair	discordant_read_pair&read_depth	3X
3	22092281	22097951	deletion	3kb mate-pair	discordant_read_pair&read_depth	3X
3	32101783	32108033	deletion	3kb mate-pair	discordant_read_pair&read_depth	3X
3	42838301	42840862	deletion	3kb mate-pair	discordant_read_pair&read_depth	3X
3	47490530	47493587	deletion	3kb mate-pair	discordant_read_pair&read_depth	3X
3	48595001	48630000	deletion	3kb mate-pair	discordant_read_pair&read_depth	3X
3	65188521	65214838	deletion	3kb mate-pair	discordant_read_pair&read_depth	3X
3	67493705	67496806	deletion	3kb mate-pair	discordant_read_pair&read_depth	3X
3	68634332	68640321	deletion	3kb mate-pair	discordant_read_pair&read_depth	3X
3	68739504	68747975	deletion	3kb mate-pair	discordant_read_pair&read_depth	3X
3	75565001	75600000	deletion	3kb mate-pair	discordant_read_pair&read_depth	3X
3	75680001	75845000	duplication	3kb mate-pair	discordant_read_pair&read_depth	3X
3	83853005	83855373	deletion	3kb mate-pair	discordant_read_pair&read_depth	3X
3	89509530	89516494	deletion	3kb mate-pair	discordant_read_pair&read_depth	3X
3	95465505	95468233	deletion	3kb mate-pair	discordant_read_pair&read_depth	3X
3	98410249	98415034	deletion	3kb mate-pair	discordant_read_pair&read_depth	3X
3	98898957	98902393	deletion	3kb mate-pair	discordant_read_pair&read_depth	3X
3	98943163	98950265	deletion	3kb mate-pair	discordant_read_pair&read_depth	3X
3	111243293	111249216	deletion	3kb mate-pair	discordant_read_pair&read_depth	3X
3	129763237	129807266	deletion	3kb mate-pair	discordant_read_pair&read_depth	3X
3	131708230	131713400	deletion	3kb mate-pair	discordant_read_pair&read_depth	3X
3	136020737	136026385	deletion	3kb mate-pair	discordant_read_pair&read_depth	3X
3	137314300	137316534	deletion	3kb mate-pair	discordant_read_pair&read_depth	3X
3	146385165	146390457	deletion	3kb mate-pair	discordant_read_pair&read_depth	3X
3	148281234	148285574	deletion	3kb mate-pair	discordant_read_pair&read_depth	3X
3	152311603	152313618	deletion	3kb mate-pair	discordant_read_pair&read_depth	3X
3	159461364	159463570	deletion	3kb mate-pair	discordant_read_pair&read_depth	3X
3	162515001	162630000	deletion	3kb mate-pair	discordant_read_pair&read_depth	3X
3	162717306	162723872	deletion	3kb mate-pair	discordant_read_pair&read_depth	3X
3	162764668	162769119	deletion	3kb mate-pair	discordant_read_pair&read_depth	3X
3	177294120	177297880	deletion	3kb mate-pair	discordant_read_pair&read_depth	3X
3	186580976	186585381	deletion	3kb mate-pair	discordant_read_pair&read_depth	3X
3	187732797	187735147	deletion	3kb mate-pair	discordant_read_pair&read_depth	3X
3	189736894	189740819	deletion	3kb mate-pair	discordant_read_pair&read_depth	3X
3	192875321	192885449	deletion	3kb mate-pair	discordant_read_pair&read_depth	3X
3	194398635	194400812	deletion	3kb mate-pair	discordant_read_pair&read_depth	3X
3	195200001	195235000	deletion	3kb mate-pair	discordant_read_pair&read_depth	3X
3	196934176	196939568	deletion	3kb mate-pair	discordant_read_pair&read_depth	3X
4	20001	70000	duplication	3kb mate-pair	discordant_read_pair&read_depth	3X
4	62453	68083	deletion	3kb mate-pair	discordant_read_pair&read_depth	3X
4	4120001	4155000	deletion	3kb mate-pair	discordant_read_pair&read_depth	3X
4	6897169	6900553	deletion	3kb mate-pair	discordant_read_pair&read_depth	3X
4	9160001	9215000	deletion	3kb mate-pair	discordant_read_pair&read_depth	3X
4	9456763	9481575	deletion	3kb mate-pair	discordant_read_pair&read_depth	3X
4	10211239	10234941	deletion	3kb mate-pair	discordant_read_pair&read_depth	3X
4	10391577	10402248	deletion	3kb mate-pair	discordant_read_pair&read_depth	3X
4	21160616	21167257	deletion	3kb mate-pair	discordant_read_pair&read_depth	3X
4	34683518	34688647	duplication	3kb mate-pair	discordant_read_pair&read_depth	3X
4	34779791	34829082	deletion	3kb mate-pair	discordant_read_pair&read_depth	3X
4	46055963	46058369	deletion	3kb mate-pair	discordant_read_pair&read_depth	3X
4	59944377	59951074	deletion	3kb mate-pair	discordant_read_pair&read_depth	3X
4	61329965	61334035	deletion	3kb mate-pair	discordant_read_pair&read_depth	3X
4	61939190	61943220	deletion	3kb mate-pair	discordant_read_pair&read_depth	3X
4	69375001	69490000	deletion	3kb mate-pair	discordant_read_pair&read_depth	3X
4	70120001	70235000	deletion	3kb mate-pair	discordant_read_pair&read_depth	3X
4	75280001	75320000	deletion	3kb mate-pair	discordant_read_pair&read_depth	3X
4	75642264	75649172	deletion	3kb mate-pair	discordant_read_pair&read_depth	3X
4	79269126	79275205	deletion	3kb mate-pair	discordant_read_pair&read_depth	3X
4	80887757	80894271	deletion	3kb mate-pair	discordant_read_pair&read_depth	3X
4	86976292	86980107	deletion	3kb mate-pair	discordant_read_pair&read_depth	3X
4	88268193	88274317	deletion	3kb mate-pair	discordant_read_pair&read_depth	3X
4	91596720	91602916	deletion	3kb mate-pair	discordant_read_pair&read_depth	3X
4	91931336	91935841	deletion	3kb mate-pair	discordant_read_pair&read_depth	3X
4	103328510	103332169	deletion	3kb mate-pair	discordant_read_pair&read_depth	3X
4	103872626	103875616	deletion	3kb mate-pair	discordant_read_pair&read_depth	3X
4	107604079	107609502	deletion	3kb mate-pair	discordant_read_pair&read_depth	3X
4	108127752	108131722	deletion	3kb mate-pair	discordant_read_pair&read_depth	3X
4	108276515	108279521	deletion	3kb mate-pair	discordant_read_pair&read_depth	3X
4	113498163	113501746	deletion	3kb mate-pair	discordant_read_pair&read_depth	3X
4	115928678	115932036	deletion	3kb mate-pair	discordant_read_pair&read_depth	3X
4	116166823	116177191	deletion	3kb mate-pair	discordant_read_pair&read_depth	3X
4	130066097	130068535	deletion	3kb mate-pair	discordant_read_pair&read_depth	3X
4	132585001	132630000	duplication	3kb mate-pair	discordant_read_pair&read_depth	3X
4	133180157	133183042	deletion	3kb mate-pair	discordant_read_pair&read_depth	3X
4	139468753	139473234	deletion	3kb mate-pair	discordant_read_pair&read_depth	3X
4	161045001	161075000	deletion	3kb mate-pair	discordant_read_pair&read_depth	3X
4	161879033	161885045	deletion	3kb mate-pair	discordant_read_pair&read_depth	3X
4	163393964	163396468	deletion	3kb mate-pair	discordant_read_pair&read_depth	3X
4	166002374	166005186	deletion	3kb mate-pair	discordant_read_pair&read_depth	3X
4	167676726	167683605	deletion	3kb mate-pair	discordant_read_pair&read_depth	3X
4	172988409	172993593	deletion	3kb mate-pair	discordant_read_pair&read_depth	3X
4	173424940	173433593	deletion	3kb mate-pair	discordant_read_pair&read_depth	3X
4	186441609	186444340	deletion	3kb mate-pair	discordant_read_pair&read_depth	3X
4	187093370	187098618	deletion	3kb mate-pair	discordant_read_pair&read_depth	3X
4	190057667	190064369	deletion	3kb mate-pair	discordant_read_pair&read_depth	3X
4	190470001	190685000	duplication	3kb mate-pair	discordant_read_pair&read_depth	3X
4	190605992	190610372	deletion	3kb mate-pair	discordant_read_pair&read_depth	3X
4	190855001	190975000	duplication	3kb mate-pair	discordant_read_pair&read_depth	3X
5	1040001	1050000	deletion	3kb mate-pair	discordant_read_pair&read_depth	3X
5	1178135	1180977	deletion	3kb mate-pair	discordant_read_pair&read_depth	3X
5	1968403	1971617	deletion	3kb mate-pair	discordant_read_pair&read_depth	3X
5	10273159	10275700	deletion	3kb mate-pair	discordant_read_pair&read_depth	3X
5	12809603	12820656	deletion	3kb mate-pair	discordant_read_pair&read_depth	3X
5	13416380	13423385	deletion	3kb mate-pair	discordant_read_pair&read_depth	3X
5	21450143	21452586	deletion	3kb mate-pair	discordant_read_pair&read_depth	3X
5	23902790	23905295	deletion	3kb mate-pair	discordant_read_pair&read_depth	3X
5	24370383	24373515	deletion	3kb mate-pair	discordant_read_pair&read_depth	3X
5	26796697	26801971	deletion	3kb mate-pair	discordant_read_pair&read_depth	3X
5	34304591	34308226	deletion	3kb mate-pair	discordant_read_pair&read_depth	3X
5	42165870	42167921	deletion	3kb mate-pair	discordant_read_pair&read_depth	3X
5	57323078	57333814	deletion	3kb mate-pair	discordant_read_pair&read_depth	3X
5	57679623	57686087	deletion	3kb mate-pair	discordant_read_pair&read_depth	3X
5	60001544	60003676	deletion	3kb mate-pair	discordant_read_pair&read_depth	3X
5	63697607	63701502	deletion	3kb mate-pair	discordant_read_pair&read_depth	3X
5	65027780	65030893	deletion	3kb mate-pair	discordant_read_pair&read_depth	3X
5	69410001	69445000	deletion	3kb mate-pair	discordant_read_pair&read_depth	3X
5	78109680	78112036	deletion	3kb mate-pair	discordant_read_pair&read_depth	3X
5	83947990	83955408	deletion	3kb mate-pair	discordant_read_pair&read_depth	3X
5	86115341	86117993	deletion	3kb mate-pair	discordant_read_pair&read_depth	3X
5	90499773	90502108	deletion	3kb mate-pair	discordant_read_pair&read_depth	3X
5	98345067	98347489	deletion	3kb mate-pair	discordant_read_pair&read_depth	3X
5	98530001	98570000	deletion	3kb mate-pair	discordant_read_pair&read_depth	3X
5	98839561	98842913	deletion	3kb mate-pair	discordant_read_pair&read_depth	3X
5	103853994	103860370	deletion	3kb mate-pair	discordant_read_pair&read_depth	3X
5	104432001	104503698	deletion	3kb mate-pair	discordant_read_pair&read_depth	3X
5	106236357	106240063	deletion	3kb mate-pair	discordant_read_pair&read_depth	3X
5	117386979	117394227	deletion	3kb mate-pair	discordant_read_pair&read_depth	3X
5	119379088	119382722	deletion	3kb mate-pair	discordant_read_pair&read_depth	3X
5	135100001	135145000	deletion	3kb mate-pair	discordant_read_pair&read_depth	3X
5	135114280	135120958	deletion	3kb mate-pair	discordant_read_pair&read_depth	3X
5	136853823	136856480	deletion	3kb mate-pair	discordant_read_pair&read_depth	3X
5	137807432	137817998	deletion	3kb mate-pair	discordant_read_pair&read_depth	3X
5	176387563	176390208	deletion	3kb mate-pair	discordant_read_pair&read_depth	3X
5	177190001	177210000	deletion	3kb mate-pair	discordant_read_pair&read_depth	3X
5	177225001	177240000	deletion	3kb mate-pair	discordant_read_pair&read_depth	3X
5	177330001	177350000	deletion	3kb mate-pair	discordant_read_pair&read_depth	3X
5	178109027	178113541	deletion	3kb mate-pair	discordant_read_pair&read_depth	3X
6	245001	380000	duplication	3kb mate-pair	discordant_read_pair&read_depth	3X
6	5037119	5040116	deletion	3kb mate-pair	discordant_read_pair&read_depth	3X
6	23743118	23746057	deletion	3kb mate-pair	discordant_read_pair&read_depth	3X
6	24811758	24817985	deletion	3kb mate-pair	discordant_read_pair&read_depth	3X
6	29685346	29688274	deletion	3kb mate-pair	discordant_read_pair&read_depth	3X
6	29899559	29901564	deletion	3kb mate-pair	discordant_read_pair&read_depth	3X
6	31211497	31214439	deletion	3kb mate-pair	discordant_read_pair&read_depth	3X
6	31421466	31424540	deletion	3kb mate-pair	discordant_read_pair&read_depth	3X
6	31950001	32005000	deletion	3kb mate-pair	discordant_read_pair&read_depth	3X
6	32455001	32565000	deletion	3kb mate-pair	discordant_read_pair&read_depth	3X
6	32561896	32564668	deletion	3kb mate-pair	discordant_read_pair&read_depth	3X
6	32595001	32640000	deletion	3kb mate-pair	discordant_read_pair&read_depth	3X
6	33024833	33028730	deletion	3kb mate-pair	discordant_read_pair&read_depth	3X
6	33582617	33585945	deletion	3kb mate-pair	discordant_read_pair&read_depth	3X
6	33937527	33943032	deletion	3kb mate-pair	discordant_read_pair&read_depth	3X
6	48930931	48938928	deletion	3kb mate-pair	discordant_read_pair&read_depth	3X
6	51739528	51745766	deletion	3kb mate-pair	discordant_read_pair&read_depth	3X
6	53928495	53934820	deletion	3kb mate-pair	discordant_read_pair&read_depth	3X
6	55825149	55846829	deletion	3kb mate-pair	discordant_read_pair&read_depth	3X
6	57205001	57620000	duplication	3kb mate-pair	discordant_read_pair&read_depth	3X
6	57284803	57289505	deletion	3kb mate-pair	discordant_read_pair&read_depth	3X
6	57297141	57301281	deletion	3kb mate-pair	discordant_read_pair&read_depth	3X
6	57423087	57429262	deletion	3kb mate-pair	discordant_read_pair&read_depth	3X
6	57582628	57590686	deletion	3kb mate-pair	discordant_read_pair&read_depth	3X
6	57623190	57628098	deletion	3kb mate-pair	discordant_read_pair&read_depth	3X
6	58423808	58428962	deletion	3kb mate-pair	discordant_read_pair&read_depth	3X
6	66259928	66262132	deletion	3kb mate-pair	discordant_read_pair&read_depth	3X
6	66398149	66404923	deletion	3kb mate-pair	discordant_read_pair&read_depth	3X
6	67007872	67049061	deletion	3kb mate-pair	discordant_read_pair&read_depth	3X
6	67039742	67043327	deletion	3kb mate-pair	discordant_read_pair&read_depth	3X
6	72863022	72873697	deletion	3kb mate-pair	discordant_read_pair&read_depth	3X
6	74613533	74620790	deletion	3kb mate-pair	discordant_read_pair&read_depth	3X
6	77097371	77102666	deletion	3kb mate-pair	discordant_read_pair&read_depth	3X
6	78967160	79036996	deletion	3kb mate-pair	discordant_read_pair&read_depth	3X
6	85317822	85324328	deletion	3kb mate-pair	discordant_read_pair&read_depth	3X
6	86637512	86640819	duplication	3kb mate-pair	discordant_read_pair&read_depth	3X
6	86708704	86715274	deletion	3kb mate-pair	discordant_read_pair&read_depth	3X
6	101934432	101939363	deletion	3kb mate-pair	discordant_read_pair&read_depth	3X
6	103737193	103763668	deletion	3kb mate-pair	discordant_read_pair&read_depth	3X
6	103939757	103943758	deletion	3kb mate-pair	discordant_read_pair&read_depth	3X
6	105260644	105264027	deletion	3kb mate-pair	discordant_read_pair&read_depth	3X
6	128827225	128830110	deletion	3kb mate-pair	discordant_read_pair&read_depth	3X
6	129319523	129325735	deletion	3kb mate-pair	discordant_read_pair&read_depth	3X
6	132106547	132108846	deletion	3kb mate-pair	discordant_read_pair&read_depth	3X
6	132114054	132118627	deletion	3kb mate-pair	discordant_read_pair&read_depth	3X
6	132375127	132378938	deletion	3kb mate-pair	discordant_read_pair&read_depth	3X
6	132707368	132713648	deletion	3kb mate-pair	discordant_read_pair&read_depth	3X
6	141548535	141550042	deletion	3kb mate-pair	discordant_read_pair&read_depth	3X
6	153029995	153033902	deletion	3kb mate-pair	discordant_read_pair&read_depth	3X
6	165724410	165732221	deletion	3kb mate-pair	discordant_read_pair&read_depth	3X
6	171005001	171045000	deletion	3kb mate-pair	discordant_read_pair&read_depth	3X
7	1184840	1187784	deletion	3kb mate-pair	discordant_read_pair&read_depth	3X
7	10504304	10506197	deletion	3kb mate-pair	discordant_read_pair&read_depth	3X
7	13022062	13028883	deletion	3kb mate-pair	discordant_read_pair&read_depth	3X
7	22434504	22436768	deletion	3kb mate-pair	discordant_read_pair&read_depth	3X
7	25057016	25059848	deletion	3kb mate-pair	discordant_read_pair&read_depth	3X
7	26136706	26145715	deletion	3kb mate-pair	discordant_read_pair&read_depth	3X
7	31315000	31319019	deletion	3kb mate-pair	discordant_read_pair&read_depth	3X
7	32390118	32393415	deletion	3kb mate-pair	discordant_read_pair&read_depth	3X
7	32774474	32778522	deletion	3kb mate-pair	discordant_read_pair&read_depth	3X
7	39819944	39826463	deletion	3kb mate-pair	discordant_read_pair&read_depth	3X
7	49719409	49725972	deletion	3kb mate-pair	discordant_read_pair&read_depth	3X
7	51594260	51598716	deletion	3kb mate-pair	discordant_read_pair&read_depth	3X
7	55286191	55289330	deletion	3kb mate-pair	discordant_read_pair&read_depth	3X
7	56217690	56220289	deletion	3kb mate-pair	discordant_read_pair&read_depth	3X
7	56761685	56770046	deletion	3kb mate-pair	discordant_read_pair&read_depth	3X
7	57605001	57775000	duplication	3kb mate-pair	discordant_read_pair&read_depth	3X
7	64315824	64318092	deletion	3kb mate-pair	discordant_read_pair&read_depth	3X
7	64950001	65060000	duplication	3kb mate-pair	discordant_read_pair&read_depth	3X
7	65857277	65860252	deletion	3kb mate-pair	discordant_read_pair&read_depth	3X
7	66696528	66699491	deletion	3kb mate-pair	discordant_read_pair&read_depth	3X
7	73827932	73831462	deletion	3kb mate-pair	discordant_read_pair&read_depth	3X
7	74630001	74910000	deletion	3kb mate-pair	discordant_read_pair&read_depth	3X
7	89810277	89812666	deletion	3kb mate-pair	discordant_read_pair&read_depth	3X
7	93416880	93423044	deletion	3kb mate-pair	discordant_read_pair&read_depth	3X
7	96475738	96481999	deletion	3kb mate-pair	discordant_read_pair&read_depth	3X
7	96543271	96546737	deletion	3kb mate-pair	discordant_read_pair&read_depth	3X
7	97394188	97402668	deletion	3kb mate-pair	discordant_read_pair&read_depth	3X
7	99180001	99195000	deletion	3kb mate-pair	discordant_read_pair&read_depth	3X
7	101000745	101006120	deletion	3kb mate-pair	discordant_read_pair&read_depth	3X
7	101290001	101335000	deletion	3kb mate-pair	discordant_read_pair&read_depth	3X
7	102135001	102320000	duplication	3kb mate-pair	discordant_read_pair&read_depth	3X
7	110181838	110188446	deletion	3kb mate-pair	discordant_read_pair&read_depth	3X
7	113416106	113422278	deletion	3kb mate-pair	discordant_read_pair&read_depth	3X
7	126045892	126051653	deletion	3kb mate-pair	discordant_read_pair&read_depth	3X
7	127214828	127218194	deletion	3kb mate-pair	discordant_read_pair&read_depth	3X
7	141765001	141795000	deletion	3kb mate-pair	discordant_read_pair&read_depth	3X
7	143505001	143530000	deletion	3kb mate-pair	discordant_read_pair&read_depth	3X
7	143910001	143980000	duplication	3kb mate-pair	discordant_read_pair&read_depth	3X
7	148072797	148076406	deletion	3kb mate-pair	discordant_read_pair&read_depth	3X
7	151230032	151232198	deletion	3kb mate-pair	discordant_read_pair&read_depth	3X
7	152281535	152284308	deletion	3kb mate-pair	discordant_read_pair&read_depth	3X
7	156386879	156394437	deletion	3kb mate-pair	discordant_read_pair&read_depth	3X
7	158125001	158135000	deletion	3kb mate-pair	discordant_read_pair&read_depth	3X
8	1	20000	deletion	3kb mate-pair	discordant_read_pair&read_depth	3X
8	594332	599470	deletion	3kb mate-pair	discordant_read_pair&read_depth	3X
8	1340001	1355000	deletion	3kb mate-pair	discordant_read_pair&read_depth	3X
8	4122786	4125003	deletion	3kb mate-pair	discordant_read_pair&read_depth	3X
8	6990863	6995722	deletion	3kb mate-pair	discordant_read_pair&read_depth	3X
8	7020001	7090000	deletion	3kb mate-pair	discordant_read_pair&read_depth	3X
8	11895001	11980000	deletion	3kb mate-pair	discordant_read_pair&read_depth	3X
8	12085001	12250000	deletion	3kb mate-pair	discordant_read_pair&read_depth	3X
8	12360001	12460000	duplication	3kb mate-pair	discordant_read_pair&read_depth	3X
8	24972346	24991117	deletion	3kb mate-pair	discordant_read_pair&read_depth	3X
8	25066424	25071070	deletion	3kb mate-pair	discordant_read_pair&read_depth	3X
8	32679796	32691326	deletion	3kb mate-pair	discordant_read_pair&read_depth	3X
8	39230001	39385000	deletion	3kb mate-pair	discordant_read_pair&read_depth	3X
8	39885596	39891002	deletion	3kb mate-pair	discordant_read_pair&read_depth	3X
8	40774598	40779861	deletion	3kb mate-pair	discordant_read_pair&read_depth	3X
8	42190397	42194394	deletion	3kb mate-pair	discordant_read_pair&read_depth	3X
8	58118358	58126113	duplication	3kb mate-pair	discordant_read_pair&read_depth	3X
8	73787748	73793874	deletion	3kb mate-pair	discordant_read_pair&read_depth	3X
8	75362819	75366987	deletion	3kb mate-pair	discordant_read_pair&read_depth	3X
8	86725001	86840000	duplication	3kb mate-pair	discordant_read_pair&read_depth	3X
8	94071850	94077489	deletion	3kb mate-pair	discordant_read_pair&read_depth	3X
8	96874941	96880388	deletion	3kb mate-pair	discordant_read_pair&read_depth	3X
8	103994652	103996821	deletion	3kb mate-pair	discordant_read_pair&read_depth	3X
8	108575001	108605000	deletion	3kb mate-pair	discordant_read_pair&read_depth	3X
8	112293795	112297153	deletion	3kb mate-pair	discordant_read_pair&read_depth	3X
8	120154547	120161434	deletion	3kb mate-pair	discordant_read_pair&read_depth	3X
8	126595070	126601520	deletion	3kb mate-pair	discordant_read_pair&read_depth	3X
8	129465051	129471300	deletion	3kb mate-pair	discordant_read_pair&read_depth	3X
8	131850572	131853191	deletion	3kb mate-pair	discordant_read_pair&read_depth	3X
8	132277117	132280746	deletion	3kb mate-pair	discordant_read_pair&read_depth	3X
8	135082233	135089167	deletion	3kb mate-pair	discordant_read_pair&read_depth	3X
8	137160147	137164058	deletion	3kb mate-pair	discordant_read_pair&read_depth	3X
8	144700483	144714980	deletion	3kb mate-pair	discordant_read_pair&read_depth	3X
8	145295001	145505000	deletion	3kb mate-pair	discordant_read_pair&read_depth	3X
9	319622	322603	deletion	3kb mate-pair	discordant_read_pair&read_depth	3X
9	15815256	15823110	deletion	3kb mate-pair	discordant_read_pair&read_depth	3X
9	17908804	17913671	deletion	3kb mate-pair	discordant_read_pair&read_depth	3X
9	22496065	22504565	deletion	3kb mate-pair	discordant_read_pair&read_depth	3X
9	23362754	23378250	deletion	3kb mate-pair	discordant_read_pair&read_depth	3X
9	29092179	29098158	deletion	3kb mate-pair	discordant_read_pair&read_depth	3X
9	39000001	39185000	duplication	3kb mate-pair	discordant_read_pair&read_depth	3X
9	41090001	41215000	deletion	3kb mate-pair	discordant_read_pair&read_depth	3X
9	41890001	41970000	duplication	3kb mate-pair	discordant_read_pair&read_depth	3X
9	42145001	42215000	duplication	3kb mate-pair	discordant_read_pair&read_depth	3X
9	42460001	42545000	duplication	3kb mate-pair	discordant_read_pair&read_depth	3X
9	42870001	43170000	duplication	3kb mate-pair	discordant_read_pair&read_depth	3X
9	43610001	43625000	deletion	3kb mate-pair	discordant_read_pair&read_depth	3X
9	43925001	44055000	deletion	3kb mate-pair	discordant_read_pair&read_depth	3X
9	44235001	44280000	deletion	3kb mate-pair	discordant_read_pair&read_depth	3X
9	44475001	44725000	deletion	3kb mate-pair	discordant_read_pair&read_depth	3X
9	45055001	45075000	deletion	3kb mate-pair	discordant_read_pair&read_depth	3X
9	45350001	45480000	duplication	3kb mate-pair	discordant_read_pair&read_depth	3X
9	46775001	46910000	duplication	3kb mate-pair	discordant_read_pair&read_depth	3X
9	46960001	47165000	deletion	3kb mate-pair	discordant_read_pair&read_depth	3X
9	65645001	65685000	deletion	3kb mate-pair	discordant_read_pair&read_depth	3X
9	66080001	66245000	deletion	3kb mate-pair	discordant_read_pair&read_depth	3X
9	66345001	66455000	deletion	3kb mate-pair	discordant_read_pair&read_depth	3X
9	66455001	66590000	duplication	3kb mate-pair	discordant_read_pair&read_depth	3X
9	66675001	66715000	duplication	3kb mate-pair	discordant_read_pair&read_depth	3X
9	67715001	67745000	deletion	3kb mate-pair	discordant_read_pair&read_depth	3X
9	67825001	67985000	duplication	3kb mate-pair	discordant_read_pair&read_depth	3X
9	68350001	68510000	duplication	3kb mate-pair	discordant_read_pair&read_depth	3X
9	68990001	69185000	duplication	3kb mate-pair	discordant_read_pair&read_depth	3X
9	70560001	70685000	duplication	3kb mate-pair	discordant_read_pair&read_depth	3X
9	71738088	71743506	deletion	3kb mate-pair	discordant_read_pair&read_depth	3X
9	73320001	73350000	deletion	3kb mate-pair	discordant_read_pair&read_depth	3X
9	78919394	78922084	deletion	3kb mate-pair	discordant_read_pair&read_depth	3X
9	79770022	79777408	duplication	3kb mate-pair	discordant_read_pair&read_depth	3X
9	83967691	83970793	deletion	3kb mate-pair	discordant_read_pair&read_depth	3X
9	84324030	84326937	deletion	3kb mate-pair	discordant_read_pair&read_depth	3X
9	90858901	90861173	deletion	3kb mate-pair	discordant_read_pair&read_depth	3X
9	96500151	96503877	deletion	3kb mate-pair	discordant_read_pair&read_depth	3X
9	101308994	101311833	deletion	3kb mate-pair	discordant_read_pair&read_depth	3X
9	104714690	104724548	deletion	3kb mate-pair	discordant_read_pair&read_depth	3X
9	110033155	110035458	deletion	3kb mate-pair	discordant_read_pair&read_depth	3X
9	110537509	110540626	deletion	3kb mate-pair	discordant_read_pair&read_depth	3X
9	131411965	131414009	deletion	3kb mate-pair	discordant_read_pair&read_depth	3X
9	133030644	133035596	deletion	3kb mate-pair	discordant_read_pair&read_depth	3X
9	138214060	138217840	deletion	3kb mate-pair	discordant_read_pair&read_depth	3X
9	140253363	140256517	deletion	3kb mate-pair	discordant_read_pair&read_depth	3X
10	4289789	4291698	deletion	3kb mate-pair	discordant_read_pair&read_depth	3X
10	4708458	4710744	deletion	3kb mate-pair	discordant_read_pair&read_depth	3X
10	5287276	5293613	deletion	3kb mate-pair	discordant_read_pair&read_depth	3X
10	5888993	5892884	deletion	3kb mate-pair	discordant_read_pair&read_depth	3X
10	6411474	6417765	deletion	3kb mate-pair	discordant_read_pair&read_depth	3X
10	24376731	24379107	deletion	3kb mate-pair	discordant_read_pair&read_depth	3X
10	27221936	27228152	deletion	3kb mate-pair	discordant_read_pair&read_depth	3X
10	31246568	31251864	deletion	3kb mate-pair	discordant_read_pair&read_depth	3X
10	32257517	32260660	deletion	3kb mate-pair	discordant_read_pair&read_depth	3X
10	38870001	38980000	duplication	3kb mate-pair	discordant_read_pair&read_depth	3X
10	42701169	42717224	deletion	3kb mate-pair	discordant_read_pair&read_depth	3X
10	42740001	42820000	duplication	3kb mate-pair	discordant_read_pair&read_depth	3X
10	46945001	47155000	duplication	3kb mate-pair	discordant_read_pair&read_depth	3X
10	47750001	47955000	deletion	3kb mate-pair	discordant_read_pair&read_depth	3X
10	48015001	48300000	deletion	3kb mate-pair	discordant_read_pair&read_depth	3X
10	48665001	48785000	deletion	3kb mate-pair	discordant_read_pair&read_depth	3X
10	51635001	51720000	deletion	3kb mate-pair	discordant_read_pair&read_depth	3X
10	51835001	52000000	deletion	3kb mate-pair	discordant_read_pair&read_depth	3X
10	53203576	53214640	deletion	3kb mate-pair	discordant_read_pair&read_depth	3X
10	59209599	59212533	deletion	3kb mate-pair	discordant_read_pair&read_depth	3X
10	65508868	65511468	deletion	3kb mate-pair	discordant_read_pair&read_depth	3X
10	71281044	71291191	deletion	3kb mate-pair	discordant_read_pair&read_depth	3X
10	78255532	78261011	deletion	3kb mate-pair	discordant_read_pair&read_depth	3X
10	81475001	81505000	deletion	3kb mate-pair	discordant_read_pair&read_depth	3X
10	90794934	90801026	duplication	3kb mate-pair	discordant_read_pair&read_depth	3X
10	94134373	94138104	deletion	3kb mate-pair	discordant_read_pair&read_depth	3X
10	99034758	99037684	deletion	3kb mate-pair	discordant_read_pair&read_depth	3X
10	100686499	100702967	deletion	3kb mate-pair	discordant_read_pair&read_depth	3X
10	108029957	108032631	deletion	3kb mate-pair	discordant_read_pair&read_depth	3X
10	111572052	111578418	deletion	3kb mate-pair	discordant_read_pair&read_depth	3X
10	114112075	114116769	deletion	3kb mate-pair	discordant_read_pair&read_depth	3X
10	118765723	118769392	deletion	3kb mate-pair	discordant_read_pair&read_depth	3X
10	122226614	122228850	deletion	3kb mate-pair	discordant_read_pair&read_depth	3X
10	127190855	127195451	duplication	3kb mate-pair	discordant_read_pair&read_depth	3X
10	127191546	127199174	deletion	3kb mate-pair	discordant_read_pair&read_depth	3X
10	132908901	132913400	deletion	3kb mate-pair	discordant_read_pair&read_depth	3X
10	132988166	132991615	deletion	3kb mate-pair	discordant_read_pair&read_depth	3X
10	135290245	135294640	deletion	3kb mate-pair	discordant_read_pair&read_depth	3X
10	135440001	135525000	duplication	3kb mate-pair	discordant_read_pair&read_depth	3X
11	1915141	1937446	deletion	3kb mate-pair	discordant_read_pair&read_depth	3X
11	3270001	3360000	deletion	3kb mate-pair	discordant_read_pair&read_depth	3X
11	4240001	4320000	deletion	3kb mate-pair	discordant_read_pair&read_depth	3X
11	5759940	5762434	deletion	3kb mate-pair	discordant_read_pair&read_depth	3X
11	22470665	22473632	deletion	3kb mate-pair	discordant_read_pair&read_depth	3X
11	24349406	24356850	deletion	3kb mate-pair	discordant_read_pair&read_depth	3X
11	29007056	29012942	deletion	3kb mate-pair	discordant_read_pair&read_depth	3X
11	31393699	31397683	deletion	3kb mate-pair	discordant_read_pair&read_depth	3X
11	45429015	45431862	deletion	3kb mate-pair	discordant_read_pair&read_depth	3X
11	47057542	47063743	deletion	3kb mate-pair	discordant_read_pair&read_depth	3X
11	48600663	48604380	deletion	3kb mate-pair	discordant_read_pair&read_depth	3X
11	55365001	55460000	deletion	3kb mate-pair	discordant_read_pair&read_depth	3X
11	55431999	55445824	duplication	3kb mate-pair	discordant_read_pair&read_depth	3X
11	58593915	58596410	deletion	3kb mate-pair	discordant_read_pair&read_depth	3X
11	60975001	61015000	deletion	3kb mate-pair	discordant_read_pair&read_depth	3X
11	66711428	66713750	deletion	3kb mate-pair	discordant_read_pair&read_depth	3X
11	67642059	67645206	deletion	3kb mate-pair	discordant_read_pair&read_depth	3X
11	81856250	81863528	deletion	3kb mate-pair	discordant_read_pair&read_depth	3X
11	89625001	89640000	deletion	3kb mate-pair	discordant_read_pair&read_depth	3X
11	92869771	92875950	deletion	3kb mate-pair	discordant_read_pair&read_depth	3X
11	93677914	93681519	deletion	3kb mate-pair	discordant_read_pair&read_depth	3X
11	93968567	93972192	duplication	3kb mate-pair	discordant_read_pair&read_depth	3X
11	95169304	95175853	deletion	3kb mate-pair	discordant_read_pair&read_depth	3X
11	101565667	101575496	deletion	3kb mate-pair	discordant_read_pair&read_depth	3X
11	102750922	102752906	deletion	3kb mate-pair	discordant_read_pair&read_depth	3X
11	104267665	104273369	deletion	3kb mate-pair	discordant_read_pair&read_depth	3X
11	122347458	122349306	deletion	3kb mate-pair	discordant_read_pair&read_depth	3X
11	124775019	124778320	deletion	3kb mate-pair	discordant_read_pair&read_depth	3X
11	134600839	134607893	deletion	3kb mate-pair	discordant_read_pair&read_depth	3X
12	377298	384849	deletion	3kb mate-pair	discordant_read_pair&read_depth	3X
12	1194034	1200825	deletion	3kb mate-pair	discordant_read_pair&read_depth	3X
12	8558271	8591545	deletion	3kb mate-pair	discordant_read_pair&read_depth	3X
12	9635001	9735000	deletion	3kb mate-pair	discordant_read_pair&read_depth	3X
12	11225001	11250000	deletion	3kb mate-pair	discordant_read_pair&read_depth	3X
12	11505001	11545000	deletion	3kb mate-pair	discordant_read_pair&read_depth	3X
12	43977433	43979707	deletion	3kb mate-pair	discordant_read_pair&read_depth	3X
12	45902753	45910033	deletion	3kb mate-pair	discordant_read_pair&read_depth	3X
12	48707382	48710920	deletion	3kb mate-pair	discordant_read_pair&read_depth	3X
12	48724875	48728699	deletion	3kb mate-pair	discordant_read_pair&read_depth	3X
12	51216461	51218650	deletion	3kb mate-pair	discordant_read_pair&read_depth	3X
12	59920001	59940000	deletion	3kb mate-pair	discordant_read_pair&read_depth	3X
12	70594776	70597929	deletion	3kb mate-pair	discordant_read_pair&read_depth	3X
12	71602027	71604637	deletion	3kb mate-pair	discordant_read_pair&read_depth	3X
12	79850001	79875000	deletion	3kb mate-pair	discordant_read_pair&read_depth	3X
12	80154915	80162470	duplication	3kb mate-pair	discordant_read_pair&read_depth	3X
12	84592989	84596202	deletion	3kb mate-pair	discordant_read_pair&read_depth	3X
12	90486945	90492313	deletion	3kb mate-pair	discordant_read_pair&read_depth	3X
12	96009556	96012457	deletion	3kb mate-pair	discordant_read_pair&read_depth	3X
12	96233466	96236556	deletion	3kb mate-pair	discordant_read_pair&read_depth	3X
12	96340242	96343305	deletion	3kb mate-pair	discordant_read_pair&read_depth	3X
12	98669743	98673139	deletion	3kb mate-pair	discordant_read_pair&read_depth	3X
12	98955143	98959171	deletion	3kb mate-pair	discordant_read_pair&read_depth	3X
12	99793945	99802761	deletion	3kb mate-pair	discordant_read_pair&read_depth	3X
12	100287892	100292166	deletion	3kb mate-pair	discordant_read_pair&read_depth	3X
12	102102371	102107091	deletion	3kb mate-pair	discordant_read_pair&read_depth	3X
12	133095001	133115000	deletion	3kb mate-pair	discordant_read_pair&read_depth	3X
13	23632136	23637494	deletion	3kb mate-pair	discordant_read_pair&read_depth	3X
13	30215632	30221849	deletion	3kb mate-pair	discordant_read_pair&read_depth	3X
13	31703096	31705823	deletion	3kb mate-pair	discordant_read_pair&read_depth	3X
13	39056384	39060280	deletion	3kb mate-pair	discordant_read_pair&read_depth	3X
13	43539048	43541503	deletion	3kb mate-pair	discordant_read_pair&read_depth	3X
13	51069162	51075168	deletion	3kb mate-pair	discordant_read_pair&read_depth	3X
13	67174790	67178330	deletion	3kb mate-pair	discordant_read_pair&read_depth	3X
13	72477008	72480636	deletion	3kb mate-pair	discordant_read_pair&read_depth	3X
13	72807380	72812360	deletion	3kb mate-pair	discordant_read_pair&read_depth	3X
13	72842931	72847066	deletion	3kb mate-pair	discordant_read_pair&read_depth	3X
13	83165829	83172371	deletion	3kb mate-pair	discordant_read_pair&read_depth	3X
13	99254104	99258786	deletion	3kb mate-pair	discordant_read_pair&read_depth	3X
13	101894051	101896608	deletion	3kb mate-pair	discordant_read_pair&read_depth	3X
13	112935001	112970000	deletion	3kb mate-pair	discordant_read_pair&read_depth	3X
14	19000001	19125000	duplication	3kb mate-pair	discordant_read_pair&read_depth	3X
14	20550057	20556076	deletion	3kb mate-pair	discordant_read_pair&read_depth	3X
14	21951948	21955046	deletion	3kb mate-pair	discordant_read_pair&read_depth	3X
14	23104988	23109500	deletion	3kb mate-pair	discordant_read_pair&read_depth	3X
14	24444856	24485325	duplication	3kb mate-pair	discordant_read_pair&read_depth	3X
14	40609632	40617827	deletion	3kb mate-pair	discordant_read_pair&read_depth	3X
14	60341311	60343292	deletion	3kb mate-pair	discordant_read_pair&read_depth	3X
14	65360287	65364148	deletion	3kb mate-pair	discordant_read_pair&read_depth	3X
14	70687666	70689633	deletion	3kb mate-pair	discordant_read_pair&read_depth	3X
14	73995001	74025000	deletion	3kb mate-pair	discordant_read_pair&read_depth	3X
14	74239657	74246956	deletion	3kb mate-pair	discordant_read_pair&read_depth	3X
14	80106160	80115234	deletion	3kb mate-pair	discordant_read_pair&read_depth	3X
14	82499110	82503322	deletion	3kb mate-pair	discordant_read_pair&read_depth	3X
14	105576661	105579777	deletion	3kb mate-pair	discordant_read_pair&read_depth	3X
14	106082430	106100347	duplication	3kb mate-pair	discordant_read_pair&read_depth	3X
15	20400001	20505000	duplication	3kb mate-pair	discordant_read_pair&read_depth	3X
15	20581327	20589612	deletion	3kb mate-pair	discordant_read_pair&read_depth	3X
15	20630001	20845000	deletion	3kb mate-pair	discordant_read_pair&read_depth	3X
15	22180001	22295000	deletion	3kb mate-pair	discordant_read_pair&read_depth	3X
15	32610001	32900000	deletion	3kb mate-pair	discordant_read_pair&read_depth	3X
15	55218068	55224534	deletion	3kb mate-pair	discordant_read_pair&read_depth	3X
15	68425994	68429000	deletion	3kb mate-pair	discordant_read_pair&read_depth	3X
15	71708123	71713791	deletion	3kb mate-pair	discordant_read_pair&read_depth	3X
15	72385874	72388529	deletion	3kb mate-pair	discordant_read_pair&read_depth	3X
15	76884545	76897267	deletion	3kb mate-pair	discordant_read_pair&read_depth	3X
15	82565611	82567872	deletion	3kb mate-pair	discordant_read_pair&read_depth	3X
15	83551577	83557802	deletion	3kb mate-pair	discordant_read_pair&read_depth	3X
15	84541246	84543875	deletion	3kb mate-pair	discordant_read_pair&read_depth	3X
15	86056437	86059329	deletion	3kb mate-pair	discordant_read_pair&read_depth	3X
15	101094514	101098812	deletion	3kb mate-pair	discordant_read_pair&read_depth	3X
16	13293856	13296945	deletion	3kb mate-pair	discordant_read_pair&read_depth	3X
16	15045001	15125000	duplication	3kb mate-pair	discordant_read_pair&read_depth	3X
16	16933463	16940544	deletion	3kb mate-pair	discordant_read_pair&read_depth	3X
16	18475001	18485000	deletion	3kb mate-pair	discordant_read_pair&read_depth	3X
16	18832313	18838674	deletion	3kb mate-pair	discordant_read_pair&read_depth	3X
16	19944630	19968059	deletion	3kb mate-pair	discordant_read_pair&read_depth	3X
16	21510001	21595000	duplication	3kb mate-pair	discordant_read_pair&read_depth	3X
16	21750001	21805000	duplication	3kb mate-pair	discordant_read_pair&read_depth	3X
16	22545001	22710000	duplication	3kb mate-pair	discordant_read_pair&read_depth	3X
16	23047287	23049836	deletion	3kb mate-pair	discordant_read_pair&read_depth	3X
16	25339835	25343162	deletion	3kb mate-pair	discordant_read_pair&read_depth	3X
16	32050001	32285000	duplication	3kb mate-pair	discordant_read_pair&read_depth	3X
16	32454740	32457501	duplication	3kb mate-pair	discordant_read_pair&read_depth	3X
16	33545092	33547409	deletion	3kb mate-pair	discordant_read_pair&read_depth	3X
16	34465001	34760000	duplication	3kb mate-pair	discordant_read_pair&read_depth	3X
16	57326337	57328982	deletion	3kb mate-pair	discordant_read_pair&read_depth	3X
16	57724515	57728121	deletion	3kb mate-pair	discordant_read_pair&read_depth	3X
16	62544129	62551765	deletion	3kb mate-pair	discordant_read_pair&read_depth	3X
16	76539111	76544101	deletion	3kb mate-pair	discordant_read_pair&read_depth	3X
16	84501431	84504626	deletion	3kb mate-pair	discordant_read_pair&read_depth	3X
16	85435001	85445000	deletion	3kb mate-pair	discordant_read_pair&read_depth	3X
17	193541	197175	deletion	3kb mate-pair	discordant_read_pair&read_depth	3X
17	5594481	5597569	deletion	3kb mate-pair	discordant_read_pair&read_depth	3X
17	12345556	12348054	deletion	3kb mate-pair	discordant_read_pair&read_depth	3X
17	12353110	12359406	deletion	3kb mate-pair	discordant_read_pair&read_depth	3X
17	16655001	16730000	duplication	3kb mate-pair	discordant_read_pair&read_depth	3X
17	18330001	18470000	deletion	3kb mate-pair	discordant_read_pair&read_depth	3X
17	18730001	18745000	deletion	3kb mate-pair	discordant_read_pair&read_depth	3X
17	20350001	20365000	deletion	3kb mate-pair	discordant_read_pair&read_depth	3X
17	21212578	21221552	deletion	3kb mate-pair	discordant_read_pair&read_depth	3X
17	21305001	21350000	duplication	3kb mate-pair	discordant_read_pair&read_depth	3X
17	25536506	25541350	deletion	3kb mate-pair	discordant_read_pair&read_depth	3X
17	26780322	26783554	deletion	3kb mate-pair	discordant_read_pair&read_depth	3X
17	34505001	34575000	deletion	3kb mate-pair	discordant_read_pair&read_depth	3X
17	34590001	34740000	deletion	3kb mate-pair	discordant_read_pair&read_depth	3X
17	35755490	35758975	deletion	3kb mate-pair	discordant_read_pair&read_depth	3X
17	36285001	36410000	duplication	3kb mate-pair	discordant_read_pair&read_depth	3X
17	36962930	36964974	deletion	3kb mate-pair	discordant_read_pair&read_depth	3X
17	39421769	39432247	deletion	3kb mate-pair	discordant_read_pair&read_depth	3X
17	41436954	41440465	deletion	3kb mate-pair	discordant_read_pair&read_depth	3X
17	41437015	41441941	duplication	3kb mate-pair	discordant_read_pair&read_depth	3X
17	44650001	44785000	deletion	3kb mate-pair	discordant_read_pair&read_depth	3X
17	51852733	51860835	deletion	3kb mate-pair	discordant_read_pair&read_depth	3X
17	77495001	77525000	deletion	3kb mate-pair	discordant_read_pair&read_depth	3X
18	15407014	15410540	duplication	3kb mate-pair	discordant_read_pair&read_depth	3X
18	30495581	30501502	deletion	3kb mate-pair	discordant_read_pair&read_depth	3X
18	38259852	38266984	deletion	3kb mate-pair	discordant_read_pair&read_depth	3X
18	38864402	38868472	deletion	3kb mate-pair	discordant_read_pair&read_depth	3X
18	47694798	47698805	deletion	3kb mate-pair	discordant_read_pair&read_depth	3X
18	51952942	51957155	deletion	3kb mate-pair	discordant_read_pair&read_depth	3X
18	54946495	54948954	deletion	3kb mate-pair	discordant_read_pair&read_depth	3X
18	63723648	63732359	deletion	3kb mate-pair	discordant_read_pair&read_depth	3X
18	63766663	63769211	deletion	3kb mate-pair	discordant_read_pair&read_depth	3X
18	68383891	68387540	deletion	3kb mate-pair	discordant_read_pair&read_depth	3X
18	76129952	76133197	deletion	3kb mate-pair	discordant_read_pair&read_depth	3X
18	77309616	77312189	deletion	3kb mate-pair	discordant_read_pair&read_depth	3X
19	8340001	8365000	deletion	3kb mate-pair	discordant_read_pair&read_depth	3X
19	12694851	12698961	deletion	3kb mate-pair	discordant_read_pair&read_depth	3X
19	15046343	15049564	deletion	3kb mate-pair	discordant_read_pair&read_depth	3X
19	20505001	20720000	deletion	3kb mate-pair	discordant_read_pair&read_depth	3X
19	21902724	21905559	deletion	3kb mate-pair	discordant_read_pair&read_depth	3X
19	23140592	23143214	deletion	3kb mate-pair	discordant_read_pair&read_depth	3X
19	29950196	29956431	deletion	3kb mate-pair	discordant_read_pair&read_depth	3X
19	30388627	30393171	deletion	3kb mate-pair	discordant_read_pair&read_depth	3X
19	35660908	35665918	deletion	3kb mate-pair	discordant_read_pair&read_depth	3X
19	40612628	40615786	deletion	3kb mate-pair	discordant_read_pair&read_depth	3X
19	46622521	46628510	deletion	3kb mate-pair	discordant_read_pair&read_depth	3X
19	51077430	51083834	deletion	3kb mate-pair	discordant_read_pair&read_depth	3X
19	52135001	52150000	deletion	3kb mate-pair	discordant_read_pair&read_depth	3X
19	52174573	52178640	deletion	3kb mate-pair	discordant_read_pair&read_depth	3X
19	53422058	53424308	deletion	3kb mate-pair	discordant_read_pair&read_depth	3X
19	53688865	53692097	deletion	3kb mate-pair	discordant_read_pair&read_depth	3X
20	1561000	1594544	deletion	3kb mate-pair	discordant_read_pair&read_depth	3X
20	2803116	2807084	deletion	3kb mate-pair	discordant_read_pair&read_depth	3X
20	25770001	25825000	deletion	3kb mate-pair	discordant_read_pair&read_depth	3X
20	25860001	25950000	duplication	3kb mate-pair	discordant_read_pair&read_depth	3X
20	25985001	26045000	deletion	3kb mate-pair	discordant_read_pair&read_depth	3X
20	26045001	26305000	duplication	3kb mate-pair	discordant_read_pair&read_depth	3X
20	29420001	29510000	duplication	3kb mate-pair	discordant_read_pair&read_depth	3X
20	29535001	29655000	duplication	3kb mate-pair	discordant_read_pair&read_depth	3X
20	29636711	29641962	deletion	3kb mate-pair	discordant_read_pair&read_depth	3X
20	31525415	31529410	deletion	3kb mate-pair	discordant_read_pair&read_depth	3X
20	32815937	32819454	deletion	3kb mate-pair	discordant_read_pair&read_depth	3X
20	42271343	42274926	deletion	3kb mate-pair	discordant_read_pair&read_depth	3X
20	42480530	42484467	deletion	3kb mate-pair	discordant_read_pair&read_depth	3X
20	50758728	50761489	deletion	3kb mate-pair	discordant_read_pair&read_depth	3X
20	52646842	52658336	deletion	3kb mate-pair	discordant_read_pair&read_depth	3X
20	54434460	54440608	deletion	3kb mate-pair	discordant_read_pair&read_depth	3X
21	9410001	9595000	duplication	3kb mate-pair	discordant_read_pair&read_depth	3X
21	9825001	10035000	duplication	3kb mate-pair	discordant_read_pair&read_depth	3X
21	10085001	10215000	duplication	3kb mate-pair	discordant_read_pair&read_depth	3X
21	10365001	10650000	duplication	3kb mate-pair	discordant_read_pair&read_depth	3X
21	11080660	11117772	deletion	3kb mate-pair	discordant_read_pair&read_depth	3X
21	11089556	11092683	deletion	3kb mate-pair	discordant_read_pair&read_depth	3X
21	11096084	11108531	deletion	3kb mate-pair	discordant_read_pair&read_depth	3X
21	11104758	11107095	deletion	3kb mate-pair	discordant_read_pair&read_depth	3X
21	14340001	14445000	duplication	3kb mate-pair	discordant_read_pair&read_depth	3X
21	43349766	43353983	deletion	3kb mate-pair	discordant_read_pair&read_depth	3X
21	44970352	44973611	deletion	3kb mate-pair	discordant_read_pair&read_depth	3X
21	47387668	47390516	deletion	3kb mate-pair	discordant_read_pair&read_depth	3X
22	16510001	16625000	deletion	3kb mate-pair	discordant_read_pair&read_depth	3X
22	16845001	16960000	duplication	3kb mate-pair	discordant_read_pair&read_depth	3X
22	17770158	17779321	deletion	3kb mate-pair	discordant_read_pair&read_depth	3X
22	18765001	18820000	duplication	3kb mate-pair	discordant_read_pair&read_depth	3X
22	20360001	20610000	deletion	3kb mate-pair	discordant_read_pair&read_depth	3X
22	20949427	20954093	deletion	3kb mate-pair	discordant_read_pair&read_depth	3X
22	21570001	21660000	duplication	3kb mate-pair	discordant_read_pair&read_depth	3X
22	21710001	21755000	deletion	3kb mate-pair	discordant_read_pair&read_depth	3X
22	21815001	21910000	deletion	3kb mate-pair	discordant_read_pair&read_depth	3X
22	22385001	22980000	deletion	3kb mate-pair	discordant_read_pair&read_depth	3X
22	22990001	23245000	deletion	3kb mate-pair	discordant_read_pair&read_depth	3X
22	24052579	24061994	duplication	3kb mate-pair	discordant_read_pair&read_depth	3X
22	24195917	24198593	deletion	3kb mate-pair	discordant_read_pair&read_depth	3X
22	24274137	24311501	deletion	3kb mate-pair	discordant_read_pair&read_depth	3X
22	27167986	27169968	deletion	3kb mate-pair	discordant_read_pair&read_depth	3X
22	31776404	31781490	deletion	3kb mate-pair	discordant_read_pair&read_depth	3X
22	37143061	37148118	deletion	3kb mate-pair	discordant_read_pair&read_depth	3X
X	1040001	1210000	deletion	3kb mate-pair	discordant_read_pair&read_depth	3X
X	1485001	1495000	deletion	3kb mate-pair	discordant_read_pair&read_depth	3X
X	1526920	1530424	deletion	3kb mate-pair	discordant_read_pair&read_depth	3X
X	2194853	2200702	deletion	3kb mate-pair	discordant_read_pair&read_depth	3X
X	5055254	5057792	deletion	3kb mate-pair	discordant_read_pair&read_depth	3X
X	11725264	11731437	deletion	3kb mate-pair	discordant_read_pair&read_depth	3X
X	12433961	12436953	deletion	3kb mate-pair	discordant_read_pair&read_depth	3X
X	32987225	32989125	deletion	3kb mate-pair	discordant_read_pair&read_depth	3X
X	67123702	67130347	deletion	3kb mate-pair	discordant_read_pair&read_depth	3X
X	70137083	70140100	deletion	3kb mate-pair	discordant_read_pair&read_depth	3X
X	77121165	77124279	deletion	3kb mate-pair	discordant_read_pair&read_depth	3X
X	78921244	78926075	deletion	3kb mate-pair	discordant_read_pair&read_depth	3X
X	81096301	81102734	deletion	3kb mate-pair	discordant_read_pair&read_depth	3X
X	81982236	81988179	deletion	3kb mate-pair	discordant_read_pair&read_depth	3X
X	85605070	85610131	deletion	3kb mate-pair	discordant_read_pair&read_depth	3X
X	91676988	91680296	deletion	3kb mate-pair	discordant_read_pair&read_depth	3X
X	95312778	95320245	deletion	3kb mate-pair	discordant_read_pair&read_depth	3X
X	101056149	101067606	duplication	3kb mate-pair	discordant_read_pair&read_depth	3X
X	120010001	120130000	deletion	3kb mate-pair	discordant_read_pair&read_depth	3X
X	126597536	126603509	deletion	3kb mate-pair	discordant_read_pair&read_depth	3X
X	144421956	144424523	deletion	3kb mate-pair	discordant_read_pair&read_depth	3X
X	150293347	150295768	deletion	3kb mate-pair	discordant_read_pair&read_depth	3X
X	152230001	152350000	deletion	3kb mate-pair	discordant_read_pair&read_depth	3X
X	154790054	154803535	deletion	3kb mate-pair	discordant_read_pair&read_depth	3X
X	155230001	155275000	deletion	3kb mate-pair	discordant_read_pair&read_depth	3X

## Sheet: 5X 3kb mate-pair
Chr	Start	End	Type	Library	Detection	Coverage
1	35001	95000	deletion	3kb mate-pair	discordant_read_pair&read_depth	5X
1	175001	320000	deletion	3kb mate-pair	discordant_read_pair&read_depth	5X
1	1275001	1295000	deletion	3kb mate-pair	discordant_read_pair&read_depth	5X
1	9595446	9598084	deletion	3kb mate-pair	discordant_read_pair&read_depth	5X
1	11051396	11054538	duplication	3kb mate-pair	discordant_read_pair&read_depth	5X
1	13015001	13170000	deletion	3kb mate-pair	discordant_read_pair&read_depth	5X
1	13220001	13440000	deletion	3kb mate-pair	discordant_read_pair&read_depth	5X
1	13475001	13665000	deletion	3kb mate-pair	discordant_read_pair&read_depth	5X
1	16151652	16155853	deletion	3kb mate-pair	discordant_read_pair&read_depth	5X
1	16830001	17125000	duplication	3kb mate-pair	discordant_read_pair&read_depth	5X
1	16891892	16893820	duplication	3kb mate-pair	discordant_read_pair&read_depth	5X
1	16945609	16948197	deletion	3kb mate-pair	discordant_read_pair&read_depth	5X
1	17009523	17013166	deletion	3kb mate-pair	discordant_read_pair&read_depth	5X
1	25158696	25161586	deletion	3kb mate-pair	discordant_read_pair&read_depth	5X
1	25590001	25660000	deletion	3kb mate-pair	discordant_read_pair&read_depth	5X
1	31574654	31577663	deletion	3kb mate-pair	discordant_read_pair&read_depth	5X
1	35101281	35112090	deletion	3kb mate-pair	discordant_read_pair&read_depth	5X
1	39998036	40001512	deletion	3kb mate-pair	discordant_read_pair&read_depth	5X
1	53560001	53570000	deletion	3kb mate-pair	discordant_read_pair&read_depth	5X
1	56125001	56135000	deletion	3kb mate-pair	discordant_read_pair&read_depth	5X
1	56831074	56834973	deletion	3kb mate-pair	discordant_read_pair&read_depth	5X
1	63705365	63708311	deletion	3kb mate-pair	discordant_read_pair&read_depth	5X
1	66024095	66030322	deletion	3kb mate-pair	discordant_read_pair&read_depth	5X
1	72766296	72811988	deletion	3kb mate-pair	discordant_read_pair&read_depth	5X
1	78649029	78654263	deletion	3kb mate-pair	discordant_read_pair&read_depth	5X
1	81403545	81410949	deletion	3kb mate-pair	discordant_read_pair&read_depth	5X
1	83125914	83127877	deletion	3kb mate-pair	discordant_read_pair&read_depth	5X
1	84517793	84524866	deletion	3kb mate-pair	discordant_read_pair&read_depth	5X
1	89475864	89478640	deletion	3kb mate-pair	discordant_read_pair&read_depth	5X
1	94288230	94291326	deletion	3kb mate-pair	discordant_read_pair&read_depth	5X
1	103785001	104000000	deletion	3kb mate-pair	discordant_read_pair&read_depth	5X
1	106486648	106490905	duplication	3kb mate-pair	discordant_read_pair&read_depth	5X
1	108402185	108405585	deletion	3kb mate-pair	discordant_read_pair&read_depth	5X
1	108732946	108737329	deletion	3kb mate-pair	discordant_read_pair&read_depth	5X
1	109572994	109575345	deletion	3kb mate-pair	discordant_read_pair&read_depth	5X
1	110187134	110191457	deletion	3kb mate-pair	discordant_read_pair&read_depth	5X
1	110225001	110240000	deletion	3kb mate-pair	discordant_read_pair&read_depth	5X
1	112835078	112837808	deletion	3kb mate-pair	discordant_read_pair&read_depth	5X
1	114039825	114046040	deletion	3kb mate-pair	discordant_read_pair&read_depth	5X
1	116229424	116232935	deletion	3kb mate-pair	discordant_read_pair&read_depth	5X
1	142535001	142730000	duplication	3kb mate-pair	discordant_read_pair&read_depth	5X
1	142780001	142965000	duplication	3kb mate-pair	discordant_read_pair&read_depth	5X
1	143115001	143285000	duplication	3kb mate-pair	discordant_read_pair&read_depth	5X
1	143345001	143545000	duplication	3kb mate-pair	discordant_read_pair&read_depth	5X
1	144340001	144495000	deletion	3kb mate-pair	discordant_read_pair&read_depth	5X
1	146165001	146305000	deletion	3kb mate-pair	discordant_read_pair&read_depth	5X
1	149260001	149370000	duplication	3kb mate-pair	discordant_read_pair&read_depth	5X
1	149460001	149645000	deletion	3kb mate-pair	discordant_read_pair&read_depth	5X
1	152555001	152590000	deletion	3kb mate-pair	discordant_read_pair&read_depth	5X
1	152759979	152771106	deletion	3kb mate-pair	discordant_read_pair&read_depth	5X
1	156526651	156528986	deletion	3kb mate-pair	discordant_read_pair&read_depth	5X
1	158867528	158869981	deletion	3kb mate-pair	discordant_read_pair&read_depth	5X
1	158960823	158966235	deletion	3kb mate-pair	discordant_read_pair&read_depth	5X
1	159014165	159019584	deletion	3kb mate-pair	discordant_read_pair&read_depth	5X
1	180749752	180755443	deletion	3kb mate-pair	discordant_read_pair&read_depth	5X
1	184814557	184821038	deletion	3kb mate-pair	discordant_read_pair&read_depth	5X
1	185009515	185011805	deletion	3kb mate-pair	discordant_read_pair&read_depth	5X
1	187464174	187466797	deletion	3kb mate-pair	discordant_read_pair&read_depth	5X
1	187716110	187722536	deletion	3kb mate-pair	discordant_read_pair&read_depth	5X
1	189704489	189783350	deletion	3kb mate-pair	discordant_read_pair&read_depth	5X
1	194451056	194454390	deletion	3kb mate-pair	discordant_read_pair&read_depth	5X
1	197500494	197503261	deletion	3kb mate-pair	discordant_read_pair&read_depth	5X
1	199438548	199440591	deletion	3kb mate-pair	discordant_read_pair&read_depth	5X
1	206283062	206288466	duplication	3kb mate-pair	discordant_read_pair&read_depth	5X
1	207541866	207545729	deletion	3kb mate-pair	discordant_read_pair&read_depth	5X
1	207700001	207745000	deletion	3kb mate-pair	discordant_read_pair&read_depth	5X
1	213083850	213086319	deletion	3kb mate-pair	discordant_read_pair&read_depth	5X
1	218182488	218188645	deletion	3kb mate-pair	discordant_read_pair&read_depth	5X
1	222373756	222380607	deletion	3kb mate-pair	discordant_read_pair&read_depth	5X
1	229812441	229821033	deletion	3kb mate-pair	discordant_read_pair&read_depth	5X
1	236548944	236551339	deletion	3kb mate-pair	discordant_read_pair&read_depth	5X
1	246682799	246685450	deletion	3kb mate-pair	discordant_read_pair&read_depth	5X
1	247850439	247856514	deletion	3kb mate-pair	discordant_read_pair&read_depth	5X
1	248051042	248057691	deletion	3kb mate-pair	discordant_read_pair&read_depth	5X
1	248670001	248820000	deletion	3kb mate-pair	discordant_read_pair&read_depth	5X
2	1525001	1540000	deletion	3kb mate-pair	discordant_read_pair&read_depth	5X
2	3732731	3738095	deletion	3kb mate-pair	discordant_read_pair&read_depth	5X
2	4212597	4224001	deletion	3kb mate-pair	discordant_read_pair&read_depth	5X
2	4781217	4787347	deletion	3kb mate-pair	discordant_read_pair&read_depth	5X
2	14704063	14710154	deletion	3kb mate-pair	discordant_read_pair&read_depth	5X
2	16271572	16273903	deletion	3kb mate-pair	discordant_read_pair&read_depth	5X
2	19190001	19225000	deletion	3kb mate-pair	discordant_read_pair&read_depth	5X
2	31724508	31727527	deletion	3kb mate-pair	discordant_read_pair&read_depth	5X
2	33141013	33143490	deletion	3kb mate-pair	discordant_read_pair&read_depth	5X
2	33224416	33227303	deletion	3kb mate-pair	discordant_read_pair&read_depth	5X
2	34523494	34525752	deletion	3kb mate-pair	discordant_read_pair&read_depth	5X
2	34695228	34736606	deletion	3kb mate-pair	discordant_read_pair&read_depth	5X
2	34797431	34801582	deletion	3kb mate-pair	discordant_read_pair&read_depth	5X
2	35975969	35997274	deletion	3kb mate-pair	discordant_read_pair&read_depth	5X
2	36216289	36219847	deletion	3kb mate-pair	discordant_read_pair&read_depth	5X
2	41973143	41976042	deletion	3kb mate-pair	discordant_read_pair&read_depth	5X
2	48781778	48784867	deletion	3kb mate-pair	discordant_read_pair&read_depth	5X
2	52749626	52785311	deletion	3kb mate-pair	discordant_read_pair&read_depth	5X
2	54565461	54567560	deletion	3kb mate-pair	discordant_read_pair&read_depth	5X
2	59623252	59631046	deletion	3kb mate-pair	discordant_read_pair&read_depth	5X
2	66505305	66507660	deletion	3kb mate-pair	discordant_read_pair&read_depth	5X
2	76526455	76528918	deletion	3kb mate-pair	discordant_read_pair&read_depth	5X
2	76773413	76775465	deletion	3kb mate-pair	discordant_read_pair&read_depth	5X
2	79076492	79081379	deletion	3kb mate-pair	discordant_read_pair&read_depth	5X
2	87625001	87745000	deletion	3kb mate-pair	discordant_read_pair&read_depth	5X
2	90370001	90505000	duplication	3kb mate-pair	discordant_read_pair&read_depth	5X
2	91710001	91955000	duplication	3kb mate-pair	discordant_read_pair&read_depth	5X
2	91970001	92140000	duplication	3kb mate-pair	discordant_read_pair&read_depth	5X
2	97870035	97873908	deletion	3kb mate-pair	discordant_read_pair&read_depth	5X
2	98140001	98160000	deletion	3kb mate-pair	discordant_read_pair&read_depth	5X
2	109689824	109695463	deletion	3kb mate-pair	discordant_read_pair&read_depth	5X
2	110690001	110735000	deletion	3kb mate-pair	discordant_read_pair&read_depth	5X
2	110985001	111030000	deletion	3kb mate-pair	discordant_read_pair&read_depth	5X
2	111155001	111200000	deletion	3kb mate-pair	discordant_read_pair&read_depth	5X
2	123476441	123482660	deletion	3kb mate-pair	discordant_read_pair&read_depth	5X
2	126443151	126452000	deletion	3kb mate-pair	discordant_read_pair&read_depth	5X
2	127674740	127677308	deletion	3kb mate-pair	discordant_read_pair&read_depth	5X
2	129638416	129646387	deletion	3kb mate-pair	discordant_read_pair&read_depth	5X
2	130242169	130251676	deletion	3kb mate-pair	discordant_read_pair&read_depth	5X
2	130954893	130957386	deletion	3kb mate-pair	discordant_read_pair&read_depth	5X
2	131225001	131320000	deletion	3kb mate-pair	discordant_read_pair&read_depth	5X
2	131340001	131430000	duplication	3kb mate-pair	discordant_read_pair&read_depth	5X
2	133671410	133674542	deletion	3kb mate-pair	discordant_read_pair&read_depth	5X
2	134966631	134970182	deletion	3kb mate-pair	discordant_read_pair&read_depth	5X
2	146862609	146876866	deletion	3kb mate-pair	discordant_read_pair&read_depth	5X
2	151031015	151038339	deletion	3kb mate-pair	discordant_read_pair&read_depth	5X
2	155818966	155830340	deletion	3kb mate-pair	discordant_read_pair&read_depth	5X
2	159958854	159961757	deletion	3kb mate-pair	discordant_read_pair&read_depth	5X
2	160149116	160151716	deletion	3kb mate-pair	discordant_read_pair&read_depth	5X
2	167494641	167501269	duplication	3kb mate-pair	discordant_read_pair&read_depth	5X
2	170104635	170111167	deletion	3kb mate-pair	discordant_read_pair&read_depth	5X
2	170641413	170644029	deletion	3kb mate-pair	discordant_read_pair&read_depth	5X
2	173179797	173186818	deletion	3kb mate-pair	discordant_read_pair&read_depth	5X
2	177265520	177272054	deletion	3kb mate-pair	discordant_read_pair&read_depth	5X
2	180065451	180082033	deletion	3kb mate-pair	discordant_read_pair&read_depth	5X
2	184085531	184091049	deletion	3kb mate-pair	discordant_read_pair&read_depth	5X
2	194689490	194698810	deletion	3kb mate-pair	discordant_read_pair&read_depth	5X
2	204181661	204191717	deletion	3kb mate-pair	discordant_read_pair&read_depth	5X
2	208351156	208359597	deletion	3kb mate-pair	discordant_read_pair&read_depth	5X
2	208474445	208476895	deletion	3kb mate-pair	discordant_read_pair&read_depth	5X
2	209942860	209949029	deletion	3kb mate-pair	discordant_read_pair&read_depth	5X
2	215728396	215730888	deletion	3kb mate-pair	discordant_read_pair&read_depth	5X
2	217089911	217092565	deletion	3kb mate-pair	discordant_read_pair&read_depth	5X
2	220052337	220056656	deletion	3kb mate-pair	discordant_read_pair&read_depth	5X
2	223760191	223762693	deletion	3kb mate-pair	discordant_read_pair&read_depth	5X
2	232690001	232715000	deletion	3kb mate-pair	discordant_read_pair&read_depth	5X
3	228783	234534	deletion	3kb mate-pair	discordant_read_pair&read_depth	5X
3	4066785	4069604	deletion	3kb mate-pair	discordant_read_pair&read_depth	5X
3	6650088	6654645	deletion	3kb mate-pair	discordant_read_pair&read_depth	5X
3	11108117	11112152	deletion	3kb mate-pair	discordant_read_pair&read_depth	5X
3	16238571	16241273	deletion	3kb mate-pair	discordant_read_pair&read_depth	5X
3	21723700	21726010	deletion	3kb mate-pair	discordant_read_pair&read_depth	5X
3	22092281	22097840	deletion	3kb mate-pair	discordant_read_pair&read_depth	5X
3	32101783	32108033	deletion	3kb mate-pair	discordant_read_pair&read_depth	5X
3	42838301	42840819	deletion	3kb mate-pair	discordant_read_pair&read_depth	5X
3	47490530	47493542	deletion	3kb mate-pair	discordant_read_pair&read_depth	5X
3	65188563	65214838	deletion	3kb mate-pair	discordant_read_pair&read_depth	5X
3	67493705	67496806	deletion	3kb mate-pair	discordant_read_pair&read_depth	5X
3	68634765	68640321	deletion	3kb mate-pair	discordant_read_pair&read_depth	5X
3	68739637	68747975	deletion	3kb mate-pair	discordant_read_pair&read_depth	5X
3	75565001	75600000	deletion	3kb mate-pair	discordant_read_pair&read_depth	5X
3	75680001	75795000	duplication	3kb mate-pair	discordant_read_pair&read_depth	5X
3	83853005	83855347	deletion	3kb mate-pair	discordant_read_pair&read_depth	5X
3	89509530	89516092	deletion	3kb mate-pair	discordant_read_pair&read_depth	5X
3	95465631	95468233	deletion	3kb mate-pair	discordant_read_pair&read_depth	5X
3	98410249	98415034	deletion	3kb mate-pair	discordant_read_pair&read_depth	5X
3	98898957	98902393	deletion	3kb mate-pair	discordant_read_pair&read_depth	5X
3	98943315	98949710	deletion	3kb mate-pair	discordant_read_pair&read_depth	5X
3	111243535	111249125	deletion	3kb mate-pair	discordant_read_pair&read_depth	5X
3	129763389	129806798	deletion	3kb mate-pair	discordant_read_pair&read_depth	5X
3	131708236	131713400	deletion	3kb mate-pair	discordant_read_pair&read_depth	5X
3	136020934	136026254	deletion	3kb mate-pair	discordant_read_pair&read_depth	5X
3	137314300	137316534	deletion	3kb mate-pair	discordant_read_pair&read_depth	5X
3	146385165	146390414	deletion	3kb mate-pair	discordant_read_pair&read_depth	5X
3	148281234	148285574	deletion	3kb mate-pair	discordant_read_pair&read_depth	5X
3	152311603	152313312	deletion	3kb mate-pair	discordant_read_pair&read_depth	5X
3	159461364	159463570	deletion	3kb mate-pair	discordant_read_pair&read_depth	5X
3	162515001	162625000	deletion	3kb mate-pair	discordant_read_pair&read_depth	5X
3	162717306	162723854	deletion	3kb mate-pair	discordant_read_pair&read_depth	5X
3	162764748	162769119	deletion	3kb mate-pair	discordant_read_pair&read_depth	5X
3	177294120	177297880	deletion	3kb mate-pair	discordant_read_pair&read_depth	5X
3	186580976	186585381	deletion	3kb mate-pair	discordant_read_pair&read_depth	5X
3	187732797	187734979	deletion	3kb mate-pair	discordant_read_pair&read_depth	5X
3	189737110	189740722	deletion	3kb mate-pair	discordant_read_pair&read_depth	5X
3	192875321	192885449	deletion	3kb mate-pair	discordant_read_pair&read_depth	5X
3	194398635	194400812	deletion	3kb mate-pair	discordant_read_pair&read_depth	5X
3	195200001	195235000	deletion	3kb mate-pair	discordant_read_pair&read_depth	5X
3	195340001	195450000	duplication	3kb mate-pair	discordant_read_pair&read_depth	5X
3	196934384	196939568	deletion	3kb mate-pair	discordant_read_pair&read_depth	5X
4	20001	70000	duplication	3kb mate-pair	discordant_read_pair&read_depth	5X
4	62453	67917	deletion	3kb mate-pair	discordant_read_pair&read_depth	5X
4	3613201	3619796	deletion	3kb mate-pair	discordant_read_pair&read_depth	5X
4	4120001	4155000	deletion	3kb mate-pair	discordant_read_pair&read_depth	5X
4	6897169	6900553	deletion	3kb mate-pair	discordant_read_pair&read_depth	5X
4	9160001	9215000	deletion	3kb mate-pair	discordant_read_pair&read_depth	5X
4	9325001	9375000	duplication	3kb mate-pair	discordant_read_pair&read_depth	5X
4	9456763	9481575	deletion	3kb mate-pair	discordant_read_pair&read_depth	5X
4	10211239	10234569	deletion	3kb mate-pair	discordant_read_pair&read_depth	5X
4	10391781	10402248	deletion	3kb mate-pair	discordant_read_pair&read_depth	5X
4	21160616	21167231	deletion	3kb mate-pair	discordant_read_pair&read_depth	5X
4	34683518	34688648	duplication	3kb mate-pair	discordant_read_pair&read_depth	5X
4	34779850	34829082	deletion	3kb mate-pair	discordant_read_pair&read_depth	5X
4	46055988	46058211	deletion	3kb mate-pair	discordant_read_pair&read_depth	5X
4	59944541	59951071	deletion	3kb mate-pair	discordant_read_pair&read_depth	5X
4	61329965	61334035	deletion	3kb mate-pair	discordant_read_pair&read_depth	5X
4	61939190	61942281	deletion	3kb mate-pair	discordant_read_pair&read_depth	5X
4	69370001	69490000	deletion	3kb mate-pair	discordant_read_pair&read_depth	5X
4	70125001	70235000	deletion	3kb mate-pair	discordant_read_pair&read_depth	5X
4	75280001	75320000	deletion	3kb mate-pair	discordant_read_pair&read_depth	5X
4	75642264	75649172	deletion	3kb mate-pair	discordant_read_pair&read_depth	5X
4	79269126	79275195	deletion	3kb mate-pair	discordant_read_pair&read_depth	5X
4	80887757	80894154	deletion	3kb mate-pair	discordant_read_pair&read_depth	5X
4	86976382	86980107	deletion	3kb mate-pair	discordant_read_pair&read_depth	5X
4	88268193	88274317	deletion	3kb mate-pair	discordant_read_pair&read_depth	5X
4	91596720	91602916	deletion	3kb mate-pair	discordant_read_pair&read_depth	5X
4	91931532	91935841	deletion	3kb mate-pair	discordant_read_pair&read_depth	5X
4	103329307	103332169	deletion	3kb mate-pair	discordant_read_pair&read_depth	5X
4	103873040	103875616	deletion	3kb mate-pair	discordant_read_pair&read_depth	5X
4	107604079	107609427	deletion	3kb mate-pair	discordant_read_pair&read_depth	5X
4	108127815	108131722	deletion	3kb mate-pair	discordant_read_pair&read_depth	5X
4	108276592	108279521	deletion	3kb mate-pair	discordant_read_pair&read_depth	5X
4	113498171	113501746	deletion	3kb mate-pair	discordant_read_pair&read_depth	5X
4	115928678	115931875	deletion	3kb mate-pair	discordant_read_pair&read_depth	5X
4	116166881	116177191	deletion	3kb mate-pair	discordant_read_pair&read_depth	5X
4	130066097	130068535	deletion	3kb mate-pair	discordant_read_pair&read_depth	5X
4	132590001	132625000	duplication	3kb mate-pair	discordant_read_pair&read_depth	5X
4	133180157	133183042	deletion	3kb mate-pair	discordant_read_pair&read_depth	5X
4	139468836	139473234	deletion	3kb mate-pair	discordant_read_pair&read_depth	5X
4	145316364	145320249	deletion	3kb mate-pair	discordant_read_pair&read_depth	5X
4	161045001	161075000	deletion	3kb mate-pair	discordant_read_pair&read_depth	5X
4	161879033	161885045	deletion	3kb mate-pair	discordant_read_pair&read_depth	5X
4	163393964	163396468	deletion	3kb mate-pair	discordant_read_pair&read_depth	5X
4	166002401	166005151	deletion	3kb mate-pair	discordant_read_pair&read_depth	5X
4	167676726	167683231	deletion	3kb mate-pair	discordant_read_pair&read_depth	5X
4	172988409	172993295	deletion	3kb mate-pair	discordant_read_pair&read_depth	5X
4	173424959	173433593	deletion	3kb mate-pair	discordant_read_pair&read_depth	5X
4	186441609	186444171	deletion	3kb mate-pair	discordant_read_pair&read_depth	5X
4	187093370	187098280	deletion	3kb mate-pair	discordant_read_pair&read_depth	5X
4	187353327	187358038	deletion	3kb mate-pair	discordant_read_pair&read_depth	5X
4	190057667	190064275	deletion	3kb mate-pair	discordant_read_pair&read_depth	5X
4	190470001	190685000	duplication	3kb mate-pair	discordant_read_pair&read_depth	5X
4	190605992	190610303	deletion	3kb mate-pair	discordant_read_pair&read_depth	5X
4	190679709	190683180	deletion	3kb mate-pair	discordant_read_pair&read_depth	5X
4	190855001	190980000	duplication	3kb mate-pair	discordant_read_pair&read_depth	5X
5	356580	360096	deletion	3kb mate-pair	discordant_read_pair&read_depth	5X
5	1040001	1050000	deletion	3kb mate-pair	discordant_read_pair&read_depth	5X
5	1178135	1180977	deletion	3kb mate-pair	discordant_read_pair&read_depth	5X
5	1968403	1971617	deletion	3kb mate-pair	discordant_read_pair&read_depth	5X
5	10273320	10275619	deletion	3kb mate-pair	discordant_read_pair&read_depth	5X
5	12810721	12820656	deletion	3kb mate-pair	discordant_read_pair&read_depth	5X
5	13416584	13423347	deletion	3kb mate-pair	discordant_read_pair&read_depth	5X
5	17712917	17715796	duplication	3kb mate-pair	discordant_read_pair&read_depth	5X
5	21450143	21452536	deletion	3kb mate-pair	discordant_read_pair&read_depth	5X
5	21525001	21575000	duplication	3kb mate-pair	discordant_read_pair&read_depth	5X
5	23902878	23905295	deletion	3kb mate-pair	discordant_read_pair&read_depth	5X
5	24370383	24373484	deletion	3kb mate-pair	discordant_read_pair&read_depth	5X
5	26796697	26801971	deletion	3kb mate-pair	discordant_read_pair&read_depth	5X
5	34304718	34307916	deletion	3kb mate-pair	discordant_read_pair&read_depth	5X
5	42165939	42167921	deletion	3kb mate-pair	discordant_read_pair&read_depth	5X
5	57323078	57333814	deletion	3kb mate-pair	discordant_read_pair&read_depth	5X
5	57679743	57686087	deletion	3kb mate-pair	discordant_read_pair&read_depth	5X
5	60001544	60003676	deletion	3kb mate-pair	discordant_read_pair&read_depth	5X
5	63697607	63701409	deletion	3kb mate-pair	discordant_read_pair&read_depth	5X
5	65027992	65030744	deletion	3kb mate-pair	discordant_read_pair&read_depth	5X
5	69410001	69445000	deletion	3kb mate-pair	discordant_read_pair&read_depth	5X
5	69745001	69780000	deletion	3kb mate-pair	discordant_read_pair&read_depth	5X
5	78109680	78112036	deletion	3kb mate-pair	discordant_read_pair&read_depth	5X
5	83948006	83955408	deletion	3kb mate-pair	discordant_read_pair&read_depth	5X
5	86115341	86117970	deletion	3kb mate-pair	discordant_read_pair&read_depth	5X
5	90499773	90502108	deletion	3kb mate-pair	discordant_read_pair&read_depth	5X
5	98345067	98347489	deletion	3kb mate-pair	discordant_read_pair&read_depth	5X
5	98530001	98570000	deletion	3kb mate-pair	discordant_read_pair&read_depth	5X
5	98839561	98842913	deletion	3kb mate-pair	discordant_read_pair&read_depth	5X
5	103853994	103860370	deletion	3kb mate-pair	discordant_read_pair&read_depth	5X
5	104432092	104503698	deletion	3kb mate-pair	discordant_read_pair&read_depth	5X
5	106236357	106240063	deletion	3kb mate-pair	discordant_read_pair&read_depth	5X
5	117387035	117394018	deletion	3kb mate-pair	discordant_read_pair&read_depth	5X
5	119379586	119382722	deletion	3kb mate-pair	discordant_read_pair&read_depth	5X
5	135100001	135145000	deletion	3kb mate-pair	discordant_read_pair&read_depth	5X
5	135114492	135120958	deletion	3kb mate-pair	discordant_read_pair&read_depth	5X
5	136854062	136856480	deletion	3kb mate-pair	discordant_read_pair&read_depth	5X
5	137807432	137817998	deletion	3kb mate-pair	discordant_read_pair&read_depth	5X
5	147552516	147555126	deletion	3kb mate-pair	discordant_read_pair&read_depth	5X
5	176387563	176390208	deletion	3kb mate-pair	discordant_read_pair&read_depth	5X
5	177190001	177210000	deletion	3kb mate-pair	discordant_read_pair&read_depth	5X
5	177225001	177240000	deletion	3kb mate-pair	discordant_read_pair&read_depth	5X
5	177335001	177350000	deletion	3kb mate-pair	discordant_read_pair&read_depth	5X
5	177821595	177823855	deletion	3kb mate-pair	discordant_read_pair&read_depth	5X
5	178109070	178113541	deletion	3kb mate-pair	discordant_read_pair&read_depth	5X
6	240001	385000	duplication	3kb mate-pair	discordant_read_pair&read_depth	5X
6	5037169	5040116	deletion	3kb mate-pair	discordant_read_pair&read_depth	5X
6	23743163	23746057	deletion	3kb mate-pair	discordant_read_pair&read_depth	5X
6	24811758	24817985	deletion	3kb mate-pair	discordant_read_pair&read_depth	5X
6	26740001	26755000	deletion	3kb mate-pair	discordant_read_pair&read_depth	5X
6	29685346	29688134	deletion	3kb mate-pair	discordant_read_pair&read_depth	5X
6	29899734	29901564	deletion	3kb mate-pair	discordant_read_pair&read_depth	5X
6	31211497	31214102	deletion	3kb mate-pair	discordant_read_pair&read_depth	5X
6	31421466	31424540	deletion	3kb mate-pair	discordant_read_pair&read_depth	5X
6	31950001	32005000	deletion	3kb mate-pair	discordant_read_pair&read_depth	5X
6	32455001	32635000	deletion	3kb mate-pair	discordant_read_pair&read_depth	5X
6	32561896	32564668	deletion	3kb mate-pair	discordant_read_pair&read_depth	5X
6	33025307	33028729	deletion	3kb mate-pair	discordant_read_pair&read_depth	5X
6	33582617	33585923	deletion	3kb mate-pair	discordant_read_pair&read_depth	5X
6	33937576	33943032	deletion	3kb mate-pair	discordant_read_pair&read_depth	5X
6	35754955	35766761	duplication	3kb mate-pair	discordant_read_pair&read_depth	5X
6	48930931	48938928	deletion	3kb mate-pair	discordant_read_pair&read_depth	5X
6	51739528	51745611	deletion	3kb mate-pair	discordant_read_pair&read_depth	5X
6	53928596	53934820	deletion	3kb mate-pair	discordant_read_pair&read_depth	5X
6	55825149	55846829	deletion	3kb mate-pair	discordant_read_pair&read_depth	5X
6	57205001	57610000	duplication	3kb mate-pair	discordant_read_pair&read_depth	5X
6	57284803	57289412	deletion	3kb mate-pair	discordant_read_pair&read_depth	5X
6	57297141	57301281	deletion	3kb mate-pair	discordant_read_pair&read_depth	5X
6	57423087	57429138	deletion	3kb mate-pair	discordant_read_pair&read_depth	5X
6	57583303	57590686	deletion	3kb mate-pair	discordant_read_pair&read_depth	5X
6	57623190	57628072	deletion	3kb mate-pair	discordant_read_pair&read_depth	5X
6	58423808	58428962	deletion	3kb mate-pair	discordant_read_pair&read_depth	5X
6	63545001	63595000	deletion	3kb mate-pair	discordant_read_pair&read_depth	5X
6	66259928	66262132	deletion	3kb mate-pair	discordant_read_pair&read_depth	5X
6	66398400	66404897	deletion	3kb mate-pair	discordant_read_pair&read_depth	5X
6	67007872	67049061	deletion	3kb mate-pair	discordant_read_pair&read_depth	5X
6	67039742	67043327	deletion	3kb mate-pair	discordant_read_pair&read_depth	5X
6	72863659	72873697	deletion	3kb mate-pair	discordant_read_pair&read_depth	5X
6	74613533	74620399	deletion	3kb mate-pair	discordant_read_pair&read_depth	5X
6	77097371	77102665	deletion	3kb mate-pair	discordant_read_pair&read_depth	5X
6	78967160	79036837	deletion	3kb mate-pair	discordant_read_pair&read_depth	5X
6	85317822	85324328	deletion	3kb mate-pair	discordant_read_pair&read_depth	5X
6	86637512	86640819	duplication	3kb mate-pair	discordant_read_pair&read_depth	5X
6	86708704	86715274	deletion	3kb mate-pair	discordant_read_pair&read_depth	5X
6	101934432	101939193	deletion	3kb mate-pair	discordant_read_pair&read_depth	5X
6	103737439	103763306	deletion	3kb mate-pair	discordant_read_pair&read_depth	5X
6	103939757	103943594	deletion	3kb mate-pair	discordant_read_pair&read_depth	5X
6	105260644	105264027	deletion	3kb mate-pair	discordant_read_pair&read_depth	5X
6	128827225	128829831	deletion	3kb mate-pair	discordant_read_pair&read_depth	5X
6	129319523	129325626	deletion	3kb mate-pair	discordant_read_pair&read_depth	5X
6	132106547	132108795	deletion	3kb mate-pair	discordant_read_pair&read_depth	5X
6	132114054	132118627	deletion	3kb mate-pair	discordant_read_pair&read_depth	5X
6	132375127	132378905	deletion	3kb mate-pair	discordant_read_pair&read_depth	5X
6	132707368	132713577	deletion	3kb mate-pair	discordant_read_pair&read_depth	5X
6	141548618	141550042	deletion	3kb mate-pair	discordant_read_pair&read_depth	5X
6	153029995	153033900	deletion	3kb mate-pair	discordant_read_pair&read_depth	5X
6	161035001	161065000	duplication	3kb mate-pair	discordant_read_pair&read_depth	5X
6	165724453	165732199	deletion	3kb mate-pair	discordant_read_pair&read_depth	5X
6	167487774	167490497	deletion	3kb mate-pair	discordant_read_pair&read_depth	5X
6	171005001	171045000	deletion	3kb mate-pair	discordant_read_pair&read_depth	5X
7	1184840	1187784	deletion	3kb mate-pair	discordant_read_pair&read_depth	5X
7	1855666	1863754	deletion	3kb mate-pair	discordant_read_pair&read_depth	5X
7	10504304	10506167	deletion	3kb mate-pair	discordant_read_pair&read_depth	5X
7	13022062	13028791	deletion	3kb mate-pair	discordant_read_pair&read_depth	5X
7	22434504	22436768	deletion	3kb mate-pair	discordant_read_pair&read_depth	5X
7	25057281	25059848	deletion	3kb mate-pair	discordant_read_pair&read_depth	5X
7	26136706	26145507	deletion	3kb mate-pair	discordant_read_pair&read_depth	5X
7	29688459	29690696	deletion	3kb mate-pair	discordant_read_pair&read_depth	5X
7	31315515	31319019	deletion	3kb mate-pair	discordant_read_pair&read_depth	5X
7	32390118	32393178	deletion	3kb mate-pair	discordant_read_pair&read_depth	5X
7	32774890	32777981	deletion	3kb mate-pair	discordant_read_pair&read_depth	5X
7	39819944	39826228	deletion	3kb mate-pair	discordant_read_pair&read_depth	5X
7	49719409	49725902	deletion	3kb mate-pair	discordant_read_pair&read_depth	5X
7	51594297	51598716	deletion	3kb mate-pair	discordant_read_pair&read_depth	5X
7	55286624	55289328	deletion	3kb mate-pair	discordant_read_pair&read_depth	5X
7	56217690	56220289	deletion	3kb mate-pair	discordant_read_pair&read_depth	5X
7	56761894	56770046	deletion	3kb mate-pair	discordant_read_pair&read_depth	5X
7	57605001	57775000	duplication	3kb mate-pair	discordant_read_pair&read_depth	5X
7	64315824	64318092	deletion	3kb mate-pair	discordant_read_pair&read_depth	5X
7	64950001	65060000	duplication	3kb mate-pair	discordant_read_pair&read_depth	5X
7	65857277	65860252	deletion	3kb mate-pair	discordant_read_pair&read_depth	5X
7	66696696	66699395	deletion	3kb mate-pair	discordant_read_pair&read_depth	5X
7	73827932	73831462	deletion	3kb mate-pair	discordant_read_pair&read_depth	5X
7	74635001	74910000	deletion	3kb mate-pair	discordant_read_pair&read_depth	5X
7	89810277	89812666	deletion	3kb mate-pair	discordant_read_pair&read_depth	5X
7	93416880	93423040	deletion	3kb mate-pair	discordant_read_pair&read_depth	5X
7	96475832	96481999	deletion	3kb mate-pair	discordant_read_pair&read_depth	5X
7	96543271	96546737	deletion	3kb mate-pair	discordant_read_pair&read_depth	5X
7	97394574	97402668	deletion	3kb mate-pair	discordant_read_pair&read_depth	5X
7	101000799	101005845	deletion	3kb mate-pair	discordant_read_pair&read_depth	5X
7	101290001	101330000	deletion	3kb mate-pair	discordant_read_pair&read_depth	5X
7	102125001	102280000	duplication	3kb mate-pair	discordant_read_pair&read_depth	5X
7	110181838	110188436	deletion	3kb mate-pair	discordant_read_pair&read_depth	5X
7	113416106	113422278	deletion	3kb mate-pair	discordant_read_pair&read_depth	5X
7	126045892	126051653	deletion	3kb mate-pair	discordant_read_pair&read_depth	5X
7	127214828	127218194	deletion	3kb mate-pair	discordant_read_pair&read_depth	5X
7	141765001	141795000	deletion	3kb mate-pair	discordant_read_pair&read_depth	5X
7	142360430	142362563	deletion	3kb mate-pair	discordant_read_pair&read_depth	5X
7	143505001	143530000	deletion	3kb mate-pair	discordant_read_pair&read_depth	5X
7	143920001	143970000	duplication	3kb mate-pair	discordant_read_pair&read_depth	5X
7	148072797	148076402	deletion	3kb mate-pair	discordant_read_pair&read_depth	5X
7	151230032	151232198	deletion	3kb mate-pair	discordant_read_pair&read_depth	5X
7	152281535	152284308	deletion	3kb mate-pair	discordant_read_pair&read_depth	5X
7	156386879	156394437	deletion	3kb mate-pair	discordant_read_pair&read_depth	5X
7	158125001	158135000	deletion	3kb mate-pair	discordant_read_pair&read_depth	5X
8	1	20000	deletion	3kb mate-pair	discordant_read_pair&read_depth	5X
8	594332	599470	deletion	3kb mate-pair	discordant_read_pair&read_depth	5X
8	1340001	1355000	deletion	3kb mate-pair	discordant_read_pair&read_depth	5X
8	2185001	2285000	duplication	3kb mate-pair	discordant_read_pair&read_depth	5X
8	4122850	4125003	deletion	3kb mate-pair	discordant_read_pair&read_depth	5X
8	6840001	6870000	deletion	3kb mate-pair	discordant_read_pair&read_depth	5X
8	6991409	6995497	deletion	3kb mate-pair	discordant_read_pair&read_depth	5X
8	7020001	7110000	deletion	3kb mate-pair	discordant_read_pair&read_depth	5X
8	11245402	11247215	deletion	3kb mate-pair	discordant_read_pair&read_depth	5X
8	11895001	11975000	deletion	3kb mate-pair	discordant_read_pair&read_depth	5X
8	12085001	12250000	deletion	3kb mate-pair	discordant_read_pair&read_depth	5X
8	12360001	12460000	duplication	3kb mate-pair	discordant_read_pair&read_depth	5X
8	24972429	24990983	deletion	3kb mate-pair	discordant_read_pair&read_depth	5X
8	25066508	25070695	deletion	3kb mate-pair	discordant_read_pair&read_depth	5X
8	30603907	30605771	deletion	3kb mate-pair	discordant_read_pair&read_depth	5X
8	32679994	32691312	deletion	3kb mate-pair	discordant_read_pair&read_depth	5X
8	39230001	39385000	deletion	3kb mate-pair	discordant_read_pair&read_depth	5X
8	39885596	39891002	deletion	3kb mate-pair	discordant_read_pair&read_depth	5X
8	40774598	40779735	deletion	3kb mate-pair	discordant_read_pair&read_depth	5X
8	42190397	42194394	deletion	3kb mate-pair	discordant_read_pair&read_depth	5X
8	47525040	47544519	duplication	3kb mate-pair	discordant_read_pair&read_depth	5X
8	58118331	58123019	duplication	3kb mate-pair	discordant_read_pair&read_depth	5X
8	73787748	73793874	deletion	3kb mate-pair	discordant_read_pair&read_depth	5X
8	75362832	75366987	deletion	3kb mate-pair	discordant_read_pair&read_depth	5X
8	86725001	86840000	duplication	3kb mate-pair	discordant_read_pair&read_depth	5X
8	94072013	94077489	deletion	3kb mate-pair	discordant_read_pair&read_depth	5X
8	96874941	96879645	deletion	3kb mate-pair	discordant_read_pair&read_depth	5X
8	103994677	103996821	deletion	3kb mate-pair	discordant_read_pair&read_depth	5X
8	108575001	108605000	deletion	3kb mate-pair	discordant_read_pair&read_depth	5X
8	112294054	112297153	deletion	3kb mate-pair	discordant_read_pair&read_depth	5X
8	118872905	118875668	deletion	3kb mate-pair	discordant_read_pair&read_depth	5X
8	120154547	120161308	deletion	3kb mate-pair	discordant_read_pair&read_depth	5X
8	126595070	126601520	deletion	3kb mate-pair	discordant_read_pair&read_depth	5X
8	127191316	127194715	deletion	3kb mate-pair	discordant_read_pair&read_depth	5X
8	129465051	129471291	deletion	3kb mate-pair	discordant_read_pair&read_depth	5X
8	131850739	131852803	deletion	3kb mate-pair	discordant_read_pair&read_depth	5X
8	132277286	132280746	deletion	3kb mate-pair	discordant_read_pair&read_depth	5X
8	135082867	135089137	deletion	3kb mate-pair	discordant_read_pair&read_depth	5X
8	137160147	137163994	deletion	3kb mate-pair	discordant_read_pair&read_depth	5X
8	142950001	142970000	deletion	3kb mate-pair	discordant_read_pair&read_depth	5X
8	144700483	144714818	deletion	3kb mate-pair	discordant_read_pair&read_depth	5X
8	145290001	145505000	deletion	3kb mate-pair	discordant_read_pair&read_depth	5X
9	319637	322355	deletion	3kb mate-pair	discordant_read_pair&read_depth	5X
9	15815256	15822158	deletion	3kb mate-pair	discordant_read_pair&read_depth	5X
9	17908922	17912868	deletion	3kb mate-pair	discordant_read_pair&read_depth	5X
9	22496265	22504494	deletion	3kb mate-pair	discordant_read_pair&read_depth	5X
9	23362790	23378135	deletion	3kb mate-pair	discordant_read_pair&read_depth	5X
9	29092453	29098062	deletion	3kb mate-pair	discordant_read_pair&read_depth	5X
9	39000001	39185000	duplication	3kb mate-pair	discordant_read_pair&read_depth	5X
9	41090001	41215000	deletion	3kb mate-pair	discordant_read_pair&read_depth	5X
9	42145001	42255000	duplication	3kb mate-pair	discordant_read_pair&read_depth	5X
9	42460001	42545000	duplication	3kb mate-pair	discordant_read_pair&read_depth	5X
9	43610001	43625000	deletion	3kb mate-pair	discordant_read_pair&read_depth	5X
9	43925001	44055000	deletion	3kb mate-pair	discordant_read_pair&read_depth	5X
9	44240001	44280000	deletion	3kb mate-pair	discordant_read_pair&read_depth	5X
9	44475001	44725000	deletion	3kb mate-pair	discordant_read_pair&read_depth	5X
9	45055001	45075000	deletion	3kb mate-pair	discordant_read_pair&read_depth	5X
9	45350001	45480000	duplication	3kb mate-pair	discordant_read_pair&read_depth	5X
9	46705001	46910000	duplication	3kb mate-pair	discordant_read_pair&read_depth	5X
9	46960001	47165000	deletion	3kb mate-pair	discordant_read_pair&read_depth	5X
9	65655001	65685000	deletion	3kb mate-pair	discordant_read_pair&read_depth	5X
9	66080001	66245000	deletion	3kb mate-pair	discordant_read_pair&read_depth	5X
9	66345001	66455000	deletion	3kb mate-pair	discordant_read_pair&read_depth	5X
9	66455001	66540000	duplication	3kb mate-pair	discordant_read_pair&read_depth	5X
9	66665001	66760000	duplication	3kb mate-pair	discordant_read_pair&read_depth	5X
9	67825001	67895000	duplication	3kb mate-pair	discordant_read_pair&read_depth	5X
9	68330001	68505000	duplication	3kb mate-pair	discordant_read_pair&read_depth	5X
9	68990001	69275000	duplication	3kb mate-pair	discordant_read_pair&read_depth	5X
9	69375001	69550000	duplication	3kb mate-pair	discordant_read_pair&read_depth	5X
9	69755001	70010000	duplication	3kb mate-pair	discordant_read_pair&read_depth	5X
9	70560001	70710000	duplication	3kb mate-pair	discordant_read_pair&read_depth	5X
9	70840001	70925000	duplication	3kb mate-pair	discordant_read_pair&read_depth	5X
9	71738117	71743506	deletion	3kb mate-pair	discordant_read_pair&read_depth	5X
9	73315001	73350000	deletion	3kb mate-pair	discordant_read_pair&read_depth	5X
9	78919421	78922052	deletion	3kb mate-pair	discordant_read_pair&read_depth	5X
9	79770022	79777408	duplication	3kb mate-pair	discordant_read_pair&read_depth	5X
9	83967796	83970793	deletion	3kb mate-pair	discordant_read_pair&read_depth	5X
9	84324345	84326937	deletion	3kb mate-pair	discordant_read_pair&read_depth	5X
9	90858901	90861173	deletion	3kb mate-pair	discordant_read_pair&read_depth	5X
9	96500151	96503659	deletion	3kb mate-pair	discordant_read_pair&read_depth	5X
9	101308994	101311833	deletion	3kb mate-pair	discordant_read_pair&read_depth	5X
9	104714690	104724548	deletion	3kb mate-pair	discordant_read_pair&read_depth	5X
9	108555001	108585000	deletion	3kb mate-pair	discordant_read_pair&read_depth	5X
9	110033387	110035458	deletion	3kb mate-pair	discordant_read_pair&read_depth	5X
9	110537510	110540626	deletion	3kb mate-pair	discordant_read_pair&read_depth	5X
9	131412086	131414009	deletion	3kb mate-pair	discordant_read_pair&read_depth	5X
9	133030644	133035430	deletion	3kb mate-pair	discordant_read_pair&read_depth	5X
9	138214060	138217715	deletion	3kb mate-pair	discordant_read_pair&read_depth	5X
9	138925001	138945000	deletion	3kb mate-pair	discordant_read_pair&read_depth	5X
9	140253416	140256245	deletion	3kb mate-pair	discordant_read_pair&read_depth	5X
9	140782638	140785360	deletion	3kb mate-pair	discordant_read_pair&read_depth	5X
10	4289789	4291698	deletion	3kb mate-pair	discordant_read_pair&read_depth	5X
10	4708515	4710555	deletion	3kb mate-pair	discordant_read_pair&read_depth	5X
10	5287276	5293340	deletion	3kb mate-pair	discordant_read_pair&read_depth	5X
10	5889294	5892884	deletion	3kb mate-pair	discordant_read_pair&read_depth	5X
10	6411474	6417765	deletion	3kb mate-pair	discordant_read_pair&read_depth	5X
10	24376731	24379107	deletion	3kb mate-pair	discordant_read_pair&read_depth	5X
10	27221936	27228152	deletion	3kb mate-pair	discordant_read_pair&read_depth	5X
10	31246703	31251864	deletion	3kb mate-pair	discordant_read_pair&read_depth	5X
10	32257842	32260660	deletion	3kb mate-pair	discordant_read_pair&read_depth	5X
10	38870001	39005000	duplication	3kb mate-pair	discordant_read_pair&read_depth	5X
10	42701169	42717068	deletion	3kb mate-pair	discordant_read_pair&read_depth	5X
10	46950001	47155000	duplication	3kb mate-pair	discordant_read_pair&read_depth	5X
10	47750001	47955000	deletion	3kb mate-pair	discordant_read_pair&read_depth	5X
10	48015001	48310000	deletion	3kb mate-pair	discordant_read_pair&read_depth	5X
10	48665001	48785000	deletion	3kb mate-pair	discordant_read_pair&read_depth	5X
10	51635001	51720000	deletion	3kb mate-pair	discordant_read_pair&read_depth	5X
10	51845001	52000000	deletion	3kb mate-pair	discordant_read_pair&read_depth	5X
10	53203576	53214285	deletion	3kb mate-pair	discordant_read_pair&read_depth	5X
10	59209599	59212408	deletion	3kb mate-pair	discordant_read_pair&read_depth	5X
10	65509028	65511468	deletion	3kb mate-pair	discordant_read_pair&read_depth	5X
10	71281044	71291111	deletion	3kb mate-pair	discordant_read_pair&read_depth	5X
10	78255532	78261011	deletion	3kb mate-pair	discordant_read_pair&read_depth	5X
10	81475001	81505000	deletion	3kb mate-pair	discordant_read_pair&read_depth	5X
10	90794934	90802196	duplication	3kb mate-pair	discordant_read_pair&read_depth	5X
10	94134409	94137680	deletion	3kb mate-pair	discordant_read_pair&read_depth	5X
10	99034758	99037684	deletion	3kb mate-pair	discordant_read_pair&read_depth	5X
10	100687155	100702968	deletion	3kb mate-pair	discordant_read_pair&read_depth	5X
10	108030260	108032623	deletion	3kb mate-pair	discordant_read_pair&read_depth	5X
10	111572052	111578371	deletion	3kb mate-pair	discordant_read_pair&read_depth	5X
10	114112076	114116769	deletion	3kb mate-pair	discordant_read_pair&read_depth	5X
10	118765733	118769392	deletion	3kb mate-pair	discordant_read_pair&read_depth	5X
10	122226693	122228850	deletion	3kb mate-pair	discordant_read_pair&read_depth	5X
10	127190829	127195501	duplication	3kb mate-pair	discordant_read_pair&read_depth	5X
10	127191546	127199175	deletion	3kb mate-pair	discordant_read_pair&read_depth	5X
10	132635595	132638891	deletion	3kb mate-pair	discordant_read_pair&read_depth	5X
10	132908958	132912948	deletion	3kb mate-pair	discordant_read_pair&read_depth	5X
10	132988166	132991615	deletion	3kb mate-pair	discordant_read_pair&read_depth	5X
10	134948916	134953005	deletion	3kb mate-pair	discordant_read_pair&read_depth	5X
10	135440001	135525000	duplication	3kb mate-pair	discordant_read_pair&read_depth	5X
11	1915206	1937446	deletion	3kb mate-pair	discordant_read_pair&read_depth	5X
11	3270001	3360000	deletion	3kb mate-pair	discordant_read_pair&read_depth	5X
11	4250001	4320000	deletion	3kb mate-pair	discordant_read_pair&read_depth	5X
11	5760047	5762434	deletion	3kb mate-pair	discordant_read_pair&read_depth	5X
11	22470778	22473632	deletion	3kb mate-pair	discordant_read_pair&read_depth	5X
11	24349406	24355785	deletion	3kb mate-pair	discordant_read_pair&read_depth	5X
11	29007099	29012942	deletion	3kb mate-pair	discordant_read_pair&read_depth	5X
11	31393764	31397667	deletion	3kb mate-pair	discordant_read_pair&read_depth	5X
11	45429487	45431819	deletion	3kb mate-pair	discordant_read_pair&read_depth	5X
11	47057542	47063743	deletion	3kb mate-pair	discordant_read_pair&read_depth	5X
11	48367457	48373864	deletion	3kb mate-pair	discordant_read_pair&read_depth	5X
11	48600847	48604364	deletion	3kb mate-pair	discordant_read_pair&read_depth	5X
11	55365001	55460000	deletion	3kb mate-pair	discordant_read_pair&read_depth	5X
11	55431999	55445824	duplication	3kb mate-pair	discordant_read_pair&read_depth	5X
11	58593915	58596191	deletion	3kb mate-pair	discordant_read_pair&read_depth	5X
11	60975001	61010000	deletion	3kb mate-pair	discordant_read_pair&read_depth	5X
11	66711428	66713750	deletion	3kb mate-pair	discordant_read_pair&read_depth	5X
11	67642059	67644915	deletion	3kb mate-pair	discordant_read_pair&read_depth	5X
11	81856305	81863457	deletion	3kb mate-pair	discordant_read_pair&read_depth	5X
11	92869771	92875906	deletion	3kb mate-pair	discordant_read_pair&read_depth	5X
11	93679132	93681519	deletion	3kb mate-pair	discordant_read_pair&read_depth	5X
11	93967875	93972192	duplication	3kb mate-pair	discordant_read_pair&read_depth	5X
11	95169304	95175453	deletion	3kb mate-pair	discordant_read_pair&read_depth	5X
11	101565687	101575259	deletion	3kb mate-pair	discordant_read_pair&read_depth	5X
11	102750922	102752906	deletion	3kb mate-pair	discordant_read_pair&read_depth	5X
11	104267732	104273369	deletion	3kb mate-pair	discordant_read_pair&read_depth	5X
11	122347458	122349304	deletion	3kb mate-pair	discordant_read_pair&read_depth	5X
11	124775019	124778320	deletion	3kb mate-pair	discordant_read_pair&read_depth	5X
11	134600839	134607893	deletion	3kb mate-pair	discordant_read_pair&read_depth	5X
12	291904	298087	deletion	3kb mate-pair	discordant_read_pair&read_depth	5X
12	377469	384849	deletion	3kb mate-pair	discordant_read_pair&read_depth	5X
12	1194034	1200395	deletion	3kb mate-pair	discordant_read_pair&read_depth	5X
12	8558483	8591313	deletion	3kb mate-pair	discordant_read_pair&read_depth	5X
12	9605001	9735000	deletion	3kb mate-pair	discordant_read_pair&read_depth	5X
12	11225001	11250000	deletion	3kb mate-pair	discordant_read_pair&read_depth	5X
12	11505001	11545000	deletion	3kb mate-pair	discordant_read_pair&read_depth	5X
12	43977433	43979571	deletion	3kb mate-pair	discordant_read_pair&read_depth	5X
12	45902753	45910033	deletion	3kb mate-pair	discordant_read_pair&read_depth	5X
12	48708285	48710920	deletion	3kb mate-pair	discordant_read_pair&read_depth	5X
12	48725141	48728699	deletion	3kb mate-pair	discordant_read_pair&read_depth	5X
12	51216461	51218530	deletion	3kb mate-pair	discordant_read_pair&read_depth	5X
12	59920001	59940000	deletion	3kb mate-pair	discordant_read_pair&read_depth	5X
12	70594776	70597879	deletion	3kb mate-pair	discordant_read_pair&read_depth	5X
12	71602227	71604637	deletion	3kb mate-pair	discordant_read_pair&read_depth	5X
12	79850001	79875000	deletion	3kb mate-pair	discordant_read_pair&read_depth	5X
12	80154915	80162710	duplication	3kb mate-pair	discordant_read_pair&read_depth	5X
12	84592989	84596115	deletion	3kb mate-pair	discordant_read_pair&read_depth	5X
12	90486996	90492027	deletion	3kb mate-pair	discordant_read_pair&read_depth	5X
12	96010304	96012457	deletion	3kb mate-pair	discordant_read_pair&read_depth	5X
12	96233466	96236556	deletion	3kb mate-pair	discordant_read_pair&read_depth	5X
12	96340242	96343305	deletion	3kb mate-pair	discordant_read_pair&read_depth	5X
12	98669768	98672897	deletion	3kb mate-pair	discordant_read_pair&read_depth	5X
12	98955143	98959171	deletion	3kb mate-pair	discordant_read_pair&read_depth	5X
12	99793945	99802761	deletion	3kb mate-pair	discordant_read_pair&read_depth	5X
12	100288214	100291934	deletion	3kb mate-pair	discordant_read_pair&read_depth	5X
12	102102371	102107091	deletion	3kb mate-pair	discordant_read_pair&read_depth	5X
12	133095001	133120000	deletion	3kb mate-pair	discordant_read_pair&read_depth	5X
13	23632337	23637494	deletion	3kb mate-pair	discordant_read_pair&read_depth	5X
13	30215725	30221849	deletion	3kb mate-pair	discordant_read_pair&read_depth	5X
13	31703096	31705823	deletion	3kb mate-pair	discordant_read_pair&read_depth	5X
13	39057273	39060280	deletion	3kb mate-pair	discordant_read_pair&read_depth	5X
13	43539205	43541481	deletion	3kb mate-pair	discordant_read_pair&read_depth	5X
13	51069162	51075152	deletion	3kb mate-pair	discordant_read_pair&read_depth	5X
13	67174790	67177467	deletion	3kb mate-pair	discordant_read_pair&read_depth	5X
13	72477237	72480636	deletion	3kb mate-pair	discordant_read_pair&read_depth	5X
13	72807380	72812360	deletion	3kb mate-pair	discordant_read_pair&read_depth	5X
13	72842931	72847066	deletion	3kb mate-pair	discordant_read_pair&read_depth	5X
13	83165829	83172201	deletion	3kb mate-pair	discordant_read_pair&read_depth	5X
13	99254104	99258786	deletion	3kb mate-pair	discordant_read_pair&read_depth	5X
13	101894051	101896608	deletion	3kb mate-pair	discordant_read_pair&read_depth	5X
13	112935001	112970000	deletion	3kb mate-pair	discordant_read_pair&read_depth	5X
14	19000001	19125000	duplication	3kb mate-pair	discordant_read_pair&read_depth	5X
14	19195001	19320000	deletion	3kb mate-pair	discordant_read_pair&read_depth	5X
14	20550437	20556076	deletion	3kb mate-pair	discordant_read_pair&read_depth	5X
14	21952377	21955046	deletion	3kb mate-pair	discordant_read_pair&read_depth	5X
14	23104988	23109349	deletion	3kb mate-pair	discordant_read_pair&read_depth	5X
14	40609746	40617685	deletion	3kb mate-pair	discordant_read_pair&read_depth	5X
14	46285001	46305000	deletion	3kb mate-pair	discordant_read_pair&read_depth	5X
14	60341378	60343292	deletion	3kb mate-pair	discordant_read_pair&read_depth	5X
14	65360367	65363944	deletion	3kb mate-pair	discordant_read_pair&read_depth	5X
14	65606191	65608240	deletion	3kb mate-pair	discordant_read_pair&read_depth	5X
14	70687666	70689633	deletion	3kb mate-pair	discordant_read_pair&read_depth	5X
14	73995001	74025000	deletion	3kb mate-pair	discordant_read_pair&read_depth	5X
14	74239657	74246947	deletion	3kb mate-pair	discordant_read_pair&read_depth	5X
14	80106160	80115234	deletion	3kb mate-pair	discordant_read_pair&read_depth	5X
14	82499110	82503322	deletion	3kb mate-pair	discordant_read_pair&read_depth	5X
14	105576661	105579581	deletion	3kb mate-pair	discordant_read_pair&read_depth	5X
14	106150001	106160000	deletion	3kb mate-pair	discordant_read_pair&read_depth	5X
14	106330040	106368504	deletion	3kb mate-pair	discordant_read_pair&read_depth	5X
15	20000001	20090000	duplication	3kb mate-pair	discordant_read_pair&read_depth	5X
15	20400001	20530000	duplication	3kb mate-pair	discordant_read_pair&read_depth	5X
15	20581327	20589611	deletion	3kb mate-pair	discordant_read_pair&read_depth	5X
15	20630001	20845000	deletion	3kb mate-pair	discordant_read_pair&read_depth	5X
15	22180001	22295000	deletion	3kb mate-pair	discordant_read_pair&read_depth	5X
15	30455001	30730000	deletion	3kb mate-pair	discordant_read_pair&read_depth	5X
15	32610001	32900000	deletion	3kb mate-pair	discordant_read_pair&read_depth	5X
15	55218230	55224534	deletion	3kb mate-pair	discordant_read_pair&read_depth	5X
15	68426008	68429000	deletion	3kb mate-pair	discordant_read_pair&read_depth	5X
15	71708123	71713791	deletion	3kb mate-pair	discordant_read_pair&read_depth	5X
15	72385929	72388529	deletion	3kb mate-pair	discordant_read_pair&read_depth	5X
15	76884545	76897228	deletion	3kb mate-pair	discordant_read_pair&read_depth	5X
15	82565611	82567872	deletion	3kb mate-pair	discordant_read_pair&read_depth	5X
15	82650001	82935000	deletion	3kb mate-pair	discordant_read_pair&read_depth	5X
15	82965001	82985000	deletion	3kb mate-pair	discordant_read_pair&read_depth	5X
15	83025001	83210000	deletion	3kb mate-pair	discordant_read_pair&read_depth	5X
15	83551577	83557754	deletion	3kb mate-pair	discordant_read_pair&read_depth	5X
15	84541246	84543875	deletion	3kb mate-pair	discordant_read_pair&read_depth	5X
15	84950001	85055000	deletion	3kb mate-pair	discordant_read_pair&read_depth	5X
15	85775001	85790000	deletion	3kb mate-pair	discordant_read_pair&read_depth	5X
15	86056571	86059329	deletion	3kb mate-pair	discordant_read_pair&read_depth	5X
15	101094533	101098812	deletion	3kb mate-pair	discordant_read_pair&read_depth	5X
16	8107276	8110314	deletion	3kb mate-pair	discordant_read_pair&read_depth	5X
16	10790001	10810000	deletion	3kb mate-pair	discordant_read_pair&read_depth	5X
16	13294396	13296547	deletion	3kb mate-pair	discordant_read_pair&read_depth	5X
16	15045001	15125000	duplication	3kb mate-pair	discordant_read_pair&read_depth	5X
16	16525001	16585000	deletion	3kb mate-pair	discordant_read_pair&read_depth	5X
16	16933463	16940544	deletion	3kb mate-pair	discordant_read_pair&read_depth	5X
16	18715001	18775000	deletion	3kb mate-pair	discordant_read_pair&read_depth	5X
16	18832464	18838674	deletion	3kb mate-pair	discordant_read_pair&read_depth	5X
16	19945517	19967609	deletion	3kb mate-pair	discordant_read_pair&read_depth	5X
16	21510001	21595000	duplication	3kb mate-pair	discordant_read_pair&read_depth	5X
16	21750001	21805000	duplication	3kb mate-pair	discordant_read_pair&read_depth	5X
16	22545001	22715000	duplication	3kb mate-pair	discordant_read_pair&read_depth	5X
16	23047287	23049836	deletion	3kb mate-pair	discordant_read_pair&read_depth	5X
16	25339835	25343162	deletion	3kb mate-pair	discordant_read_pair&read_depth	5X
16	32050001	32285000	duplication	3kb mate-pair	discordant_read_pair&read_depth	5X
16	32454740	32457501	duplication	3kb mate-pair	discordant_read_pair&read_depth	5X
16	33545092	33547409	deletion	3kb mate-pair	discordant_read_pair&read_depth	5X
16	34465001	34760000	duplication	3kb mate-pair	discordant_read_pair&read_depth	5X
16	57724515	57728082	deletion	3kb mate-pair	discordant_read_pair&read_depth	5X
16	62544307	62551432	deletion	3kb mate-pair	discordant_read_pair&read_depth	5X
16	70976591	70979997	deletion	3kb mate-pair	discordant_read_pair&read_depth	5X
16	76539111	76544021	deletion	3kb mate-pair	discordant_read_pair&read_depth	5X
16	84501431	84504626	deletion	3kb mate-pair	discordant_read_pair&read_depth	5X
16	85435001	85445000	deletion	3kb mate-pair	discordant_read_pair&read_depth	5X
17	193703	197175	deletion	3kb mate-pair	discordant_read_pair&read_depth	5X
17	5594481	5597569	deletion	3kb mate-pair	discordant_read_pair&read_depth	5X
17	12345556	12347254	deletion	3kb mate-pair	discordant_read_pair&read_depth	5X
17	12353110	12359263	deletion	3kb mate-pair	discordant_read_pair&read_depth	5X
17	14189538	14191829	deletion	3kb mate-pair	discordant_read_pair&read_depth	5X
17	16655001	16735000	duplication	3kb mate-pair	discordant_read_pair&read_depth	5X
17	18330001	18485000	deletion	3kb mate-pair	discordant_read_pair&read_depth	5X
17	18730001	18745000	deletion	3kb mate-pair	discordant_read_pair&read_depth	5X
17	21212578	21221490	deletion	3kb mate-pair	discordant_read_pair&read_depth	5X
17	21305001	21350000	duplication	3kb mate-pair	discordant_read_pair&read_depth	5X
17	25536506	25541024	deletion	3kb mate-pair	discordant_read_pair&read_depth	5X
17	26780356	26783554	deletion	3kb mate-pair	discordant_read_pair&read_depth	5X
17	34505001	34575000	deletion	3kb mate-pair	discordant_read_pair&read_depth	5X
17	34590001	34740000	deletion	3kb mate-pair	discordant_read_pair&read_depth	5X
17	35755490	35758975	deletion	3kb mate-pair	discordant_read_pair&read_depth	5X
17	39421808	39432199	deletion	3kb mate-pair	discordant_read_pair&read_depth	5X
17	41436954	41440465	deletion	3kb mate-pair	discordant_read_pair&read_depth	5X
17	41437196	41442200	duplication	3kb mate-pair	discordant_read_pair&read_depth	5X
17	44640001	44785000	deletion	3kb mate-pair	discordant_read_pair&read_depth	5X
17	51852733	51860835	deletion	3kb mate-pair	discordant_read_pair&read_depth	5X
17	55089655	55092962	deletion	3kb mate-pair	discordant_read_pair&read_depth	5X
17	77495001	77525000	deletion	3kb mate-pair	discordant_read_pair&read_depth	5X
18	15407014	15410540	duplication	3kb mate-pair	discordant_read_pair&read_depth	5X
18	30495581	30501407	deletion	3kb mate-pair	discordant_read_pair&read_depth	5X
18	38259852	38266835	deletion	3kb mate-pair	discordant_read_pair&read_depth	5X
18	38864430	38868453	deletion	3kb mate-pair	discordant_read_pair&read_depth	5X
18	47694798	47698505	deletion	3kb mate-pair	discordant_read_pair&read_depth	5X
18	51952972	51957155	deletion	3kb mate-pair	discordant_read_pair&read_depth	5X
18	54946705	54948824	deletion	3kb mate-pair	discordant_read_pair&read_depth	5X
18	59672292	59674783	deletion	3kb mate-pair	discordant_read_pair&read_depth	5X
18	63723689	63732359	deletion	3kb mate-pair	discordant_read_pair&read_depth	5X
18	63766720	63769211	deletion	3kb mate-pair	discordant_read_pair&read_depth	5X
18	68383891	68387400	deletion	3kb mate-pair	discordant_read_pair&read_depth	5X
18	76129952	76133197	deletion	3kb mate-pair	discordant_read_pair&read_depth	5X
18	76662442	76666400	deletion	3kb mate-pair	discordant_read_pair&read_depth	5X
18	77309931	77312110	deletion	3kb mate-pair	discordant_read_pair&read_depth	5X
19	8340001	8365000	deletion	3kb mate-pair	discordant_read_pair&read_depth	5X
19	12694873	12698929	deletion	3kb mate-pair	discordant_read_pair&read_depth	5X
19	15046371	15049564	deletion	3kb mate-pair	discordant_read_pair&read_depth	5X
19	20505001	20720000	deletion	3kb mate-pair	discordant_read_pair&read_depth	5X
19	21902832	21905559	deletion	3kb mate-pair	discordant_read_pair&read_depth	5X
19	23140789	23143214	deletion	3kb mate-pair	discordant_read_pair&read_depth	5X
19	29950196	29956431	deletion	3kb mate-pair	discordant_read_pair&read_depth	5X
19	30388627	30393113	deletion	3kb mate-pair	discordant_read_pair&read_depth	5X
19	31287432	31289806	deletion	3kb mate-pair	discordant_read_pair&read_depth	5X
19	35660908	35665871	deletion	3kb mate-pair	discordant_read_pair&read_depth	5X
19	36840751	36847086	deletion	3kb mate-pair	discordant_read_pair&read_depth	5X
19	40612628	40615786	deletion	3kb mate-pair	discordant_read_pair&read_depth	5X
19	46622729	46628510	deletion	3kb mate-pair	discordant_read_pair&read_depth	5X
19	51077430	51082866	deletion	3kb mate-pair	discordant_read_pair&read_depth	5X
19	52132154	52150403	deletion	3kb mate-pair	discordant_read_pair&read_depth	5X
19	52175752	52178409	deletion	3kb mate-pair	discordant_read_pair&read_depth	5X
19	53422191	53424308	deletion	3kb mate-pair	discordant_read_pair&read_depth	5X
19	53689034	53692097	deletion	3kb mate-pair	discordant_read_pair&read_depth	5X
20	1561000	1594387	deletion	3kb mate-pair	discordant_read_pair&read_depth	5X
20	2803128	2806505	deletion	3kb mate-pair	discordant_read_pair&read_depth	5X
20	25770001	25825000	deletion	3kb mate-pair	discordant_read_pair&read_depth	5X
20	25860001	25950000	duplication	3kb mate-pair	discordant_read_pair&read_depth	5X
20	25975001	26050000	deletion	3kb mate-pair	discordant_read_pair&read_depth	5X
20	26050001	26150000	duplication	3kb mate-pair	discordant_read_pair&read_depth	5X
20	29420001	29490000	duplication	3kb mate-pair	discordant_read_pair&read_depth	5X
20	29535001	29655000	duplication	3kb mate-pair	discordant_read_pair&read_depth	5X
20	31525415	31529396	deletion	3kb mate-pair	discordant_read_pair&read_depth	5X
20	32815937	32819454	deletion	3kb mate-pair	discordant_read_pair&read_depth	5X
20	42271343	42274917	deletion	3kb mate-pair	discordant_read_pair&read_depth	5X
20	42480530	42484200	deletion	3kb mate-pair	discordant_read_pair&read_depth	5X
20	50758757	50761489	deletion	3kb mate-pair	discordant_read_pair&read_depth	5X
20	52646898	52658177	deletion	3kb mate-pair	discordant_read_pair&read_depth	5X
20	54434561	54440608	deletion	3kb mate-pair	discordant_read_pair&read_depth	5X
20	62720001	62730000	deletion	3kb mate-pair	discordant_read_pair&read_depth	5X
21	9410001	9595000	duplication	3kb mate-pair	discordant_read_pair&read_depth	5X
21	9825001	10035000	duplication	3kb mate-pair	discordant_read_pair&read_depth	5X
21	10085001	10215000	duplication	3kb mate-pair	discordant_read_pair&read_depth	5X
21	10365001	10650000	duplication	3kb mate-pair	discordant_read_pair&read_depth	5X
21	11080660	11117772	deletion	3kb mate-pair	discordant_read_pair&read_depth	5X
21	11089556	11092640	deletion	3kb mate-pair	discordant_read_pair&read_depth	5X
21	11096340	11108531	deletion	3kb mate-pair	discordant_read_pair&read_depth	5X
21	11104205	11106677	deletion	3kb mate-pair	discordant_read_pair&read_depth	5X
21	14340001	14445000	duplication	3kb mate-pair	discordant_read_pair&read_depth	5X
21	43350028	43353983	deletion	3kb mate-pair	discordant_read_pair&read_depth	5X
21	44970352	44973327	deletion	3kb mate-pair	discordant_read_pair&read_depth	5X
21	47387683	47390516	deletion	3kb mate-pair	discordant_read_pair&read_depth	5X
22	16510001	16625000	deletion	3kb mate-pair	discordant_read_pair&read_depth	5X
22	16845001	16960000	duplication	3kb mate-pair	discordant_read_pair&read_depth	5X
22	17770158	17779321	deletion	3kb mate-pair	discordant_read_pair&read_depth	5X
22	18765001	18890000	duplication	3kb mate-pair	discordant_read_pair&read_depth	5X
22	20365001	20610000	deletion	3kb mate-pair	discordant_read_pair&read_depth	5X
22	20949974	20954044	deletion	3kb mate-pair	discordant_read_pair&read_depth	5X
22	21570001	21660000	duplication	3kb mate-pair	discordant_read_pair&read_depth	5X
22	21710001	21755000	deletion	3kb mate-pair	discordant_read_pair&read_depth	5X
22	21815001	21905000	deletion	3kb mate-pair	discordant_read_pair&read_depth	5X
22	22385001	23245000	deletion	3kb mate-pair	discordant_read_pair&read_depth	5X
22	24052579	24061994	duplication	3kb mate-pair	discordant_read_pair&read_depth	5X
22	24195917	24198593	deletion	3kb mate-pair	discordant_read_pair&read_depth	5X
22	24274137	24311373	deletion	3kb mate-pair	discordant_read_pair&read_depth	5X
22	27167986	27169887	deletion	3kb mate-pair	discordant_read_pair&read_depth	5X
22	31776404	31781453	deletion	3kb mate-pair	discordant_read_pair&read_depth	5X
22	37143061	37148118	deletion	3kb mate-pair	discordant_read_pair&read_depth	5X
X	1040001	1210000	deletion	3kb mate-pair	discordant_read_pair&read_depth	5X
X	1485001	1495000	deletion	3kb mate-pair	discordant_read_pair&read_depth	5X
X	1526920	1529194	deletion	3kb mate-pair	discordant_read_pair&read_depth	5X
X	1755776	1760304	deletion	3kb mate-pair	discordant_read_pair&read_depth	5X
X	2195181	2200509	deletion	3kb mate-pair	discordant_read_pair&read_depth	5X
X	5055254	5057543	deletion	3kb mate-pair	discordant_read_pair&read_depth	5X
X	11725276	11731437	deletion	3kb mate-pair	discordant_read_pair&read_depth	5X
X	12434233	12436953	deletion	3kb mate-pair	discordant_read_pair&read_depth	5X
X	32987225	32989125	deletion	3kb mate-pair	discordant_read_pair&read_depth	5X
X	67123761	67130347	deletion	3kb mate-pair	discordant_read_pair&read_depth	5X
X	70137083	70140100	deletion	3kb mate-pair	discordant_read_pair&read_depth	5X
X	77121165	77124279	deletion	3kb mate-pair	discordant_read_pair&read_depth	5X
X	78921683	78926075	deletion	3kb mate-pair	discordant_read_pair&read_depth	5X
X	81096508	81102734	deletion	3kb mate-pair	discordant_read_pair&read_depth	5X
X	81982318	81988179	deletion	3kb mate-pair	discordant_read_pair&read_depth	5X
X	85605085	85609913	deletion	3kb mate-pair	discordant_read_pair&read_depth	5X
X	91676988	91680296	deletion	3kb mate-pair	discordant_read_pair&read_depth	5X
X	95312778	95319813	deletion	3kb mate-pair	discordant_read_pair&read_depth	5X
X	101055510	101067772	duplication	3kb mate-pair	discordant_read_pair&read_depth	5X
X	118873938	118876849	deletion	3kb mate-pair	discordant_read_pair&read_depth	5X
X	120010001	120130000	deletion	3kb mate-pair	discordant_read_pair&read_depth	5X
X	126597536	126603012	deletion	3kb mate-pair	discordant_read_pair&read_depth	5X
X	128500014	128502490	deletion	3kb mate-pair	discordant_read_pair&read_depth	5X
X	144421979	144424523	deletion	3kb mate-pair	discordant_read_pair&read_depth	5X
X	150293347	150295768	deletion	3kb mate-pair	discordant_read_pair&read_depth	5X
X	151080001	151090000	deletion	3kb mate-pair	discordant_read_pair&read_depth	5X
X	152230001	152350000	deletion	3kb mate-pair	discordant_read_pair&read_depth	5X
X	152765001	152785000	deletion	3kb mate-pair	discordant_read_pair&read_depth	5X
X	154790112	154803535	deletion	3kb mate-pair	discordant_read_pair&read_depth	5X
X	155230001	155275000	deletion	3kb mate-pair	discordant_read_pair&read_depth	5X

## Sheet: 1X 5kb mate-pair
Chr	Start	End	Type	Library	Detection	Coverage
1	140001	320000	deletion	5kb mate-pair	discordant_read_pair&read_depth	1X
1	13010001	13170000	deletion	5kb mate-pair	discordant_read_pair&read_depth	1X
1	13475001	13665000	deletion	5kb mate-pair	discordant_read_pair&read_depth	1X
1	16151339	16156905	deletion	5kb mate-pair	discordant_read_pair&read_depth	1X
1	16855001	17000000	duplication	5kb mate-pair	discordant_read_pair&read_depth	1X
1	17020001	17125000	duplication	5kb mate-pair	discordant_read_pair&read_depth	1X
1	25157354	25162043	deletion	5kb mate-pair	discordant_read_pair&read_depth	1X
1	25595001	25665000	deletion	5kb mate-pair	discordant_read_pair&read_depth	1X
1	35101320	35112235	deletion	5kb mate-pair	discordant_read_pair&read_depth	1X
1	56829582	56835243	deletion	5kb mate-pair	discordant_read_pair&read_depth	1X
1	63705228	63709138	deletion	5kb mate-pair	discordant_read_pair&read_depth	1X
1	66023805	66030732	deletion	5kb mate-pair	discordant_read_pair&read_depth	1X
1	72765986	72811915	deletion	5kb mate-pair	discordant_read_pair&read_depth	1X
1	78648388	78654310	deletion	5kb mate-pair	discordant_read_pair&read_depth	1X
1	81403546	81411047	deletion	5kb mate-pair	discordant_read_pair&read_depth	1X
1	84516732	84524715	deletion	5kb mate-pair	discordant_read_pair&read_depth	1X
1	89474980	89480134	deletion	5kb mate-pair	discordant_read_pair&read_depth	1X
1	94288305	94291798	deletion	5kb mate-pair	discordant_read_pair&read_depth	1X
1	103785001	103975000	deletion	5kb mate-pair	discordant_read_pair&read_depth	1X
1	108401592	108406363	deletion	5kb mate-pair	discordant_read_pair&read_depth	1X
1	108732733	108738232	deletion	5kb mate-pair	discordant_read_pair&read_depth	1X
1	110186780	110191877	deletion	5kb mate-pair	discordant_read_pair&read_depth	1X
1	112834065	112838898	deletion	5kb mate-pair	discordant_read_pair&read_depth	1X
1	114039594	114047970	deletion	5kb mate-pair	discordant_read_pair&read_depth	1X
1	116228796	116235378	deletion	5kb mate-pair	discordant_read_pair&read_depth	1X
1	142535001	142730000	duplication	5kb mate-pair	discordant_read_pair&read_depth	1X
1	142780001	142970000	duplication	5kb mate-pair	discordant_read_pair&read_depth	1X
1	143125001	143285000	duplication	5kb mate-pair	discordant_read_pair&read_depth	1X
1	143345001	143545000	duplication	5kb mate-pair	discordant_read_pair&read_depth	1X
1	144345001	144495000	deletion	5kb mate-pair	discordant_read_pair&read_depth	1X
1	146160001	146305000	deletion	5kb mate-pair	discordant_read_pair&read_depth	1X
1	148835001	148955000	duplication	5kb mate-pair	discordant_read_pair&read_depth	1X
1	149265001	149370000	duplication	5kb mate-pair	discordant_read_pair&read_depth	1X
1	152555164	152589003	deletion	5kb mate-pair	discordant_read_pair&read_depth	1X
1	152759812	152771126	deletion	5kb mate-pair	discordant_read_pair&read_depth	1X
1	158867280	158870769	deletion	5kb mate-pair	discordant_read_pair&read_depth	1X
1	158961212	158966304	deletion	5kb mate-pair	discordant_read_pair&read_depth	1X
1	180749664	180755470	deletion	5kb mate-pair	discordant_read_pair&read_depth	1X
1	184812244	184821168	deletion	5kb mate-pair	discordant_read_pair&read_depth	1X
1	187715851	187722892	deletion	5kb mate-pair	discordant_read_pair&read_depth	1X
1	189704105	189784169	deletion	5kb mate-pair	discordant_read_pair&read_depth	1X
1	194450361	194454839	deletion	5kb mate-pair	discordant_read_pair&read_depth	1X
1	197499893	197503313	deletion	5kb mate-pair	discordant_read_pair&read_depth	1X
1	206282728	206288208	duplication	5kb mate-pair	discordant_read_pair&read_depth	1X
1	207540348	207545674	deletion	5kb mate-pair	discordant_read_pair&read_depth	1X
1	218182425	218188986	deletion	5kb mate-pair	discordant_read_pair&read_depth	1X
1	222373954	222383096	deletion	5kb mate-pair	discordant_read_pair&read_depth	1X
1	229812081	229821069	deletion	5kb mate-pair	discordant_read_pair&read_depth	1X
1	247850280	247856515	deletion	5kb mate-pair	discordant_read_pair&read_depth	1X
1	248050783	248057762	deletion	5kb mate-pair	discordant_read_pair&read_depth	1X
1	248600001	248670000	duplication	5kb mate-pair	discordant_read_pair&read_depth	1X
1	248670001	248820000	deletion	5kb mate-pair	discordant_read_pair&read_depth	1X
2	3732657	3738894	deletion	5kb mate-pair	discordant_read_pair&read_depth	1X
2	4212430	4224741	deletion	5kb mate-pair	discordant_read_pair&read_depth	1X
2	4781007	4787892	deletion	5kb mate-pair	discordant_read_pair&read_depth	1X
2	14703755	14711059	deletion	5kb mate-pair	discordant_read_pair&read_depth	1X
2	19185001	19225000	deletion	5kb mate-pair	discordant_read_pair&read_depth	1X
2	34695651	34736702	deletion	5kb mate-pair	discordant_read_pair&read_depth	1X
2	34797028	34802329	deletion	5kb mate-pair	discordant_read_pair&read_depth	1X
2	35975100	35997308	deletion	5kb mate-pair	discordant_read_pair&read_depth	1X
2	41971368	41977168	deletion	5kb mate-pair	discordant_read_pair&read_depth	1X
2	48781723	48785405	deletion	5kb mate-pair	discordant_read_pair&read_depth	1X
2	52749631	52785350	deletion	5kb mate-pair	discordant_read_pair&read_depth	1X
2	59623212	59631228	deletion	5kb mate-pair	discordant_read_pair&read_depth	1X
2	79076456	79081251	deletion	5kb mate-pair	discordant_read_pair&read_depth	1X
2	87565001	87625000	duplication	5kb mate-pair	discordant_read_pair&read_depth	1X
2	87630001	87735000	deletion	5kb mate-pair	discordant_read_pair&read_depth	1X
2	90370001	90490000	duplication	5kb mate-pair	discordant_read_pair&read_depth	1X
2	91715001	91945000	duplication	5kb mate-pair	discordant_read_pair&read_depth	1X
2	91970001	92105000	duplication	5kb mate-pair	discordant_read_pair&read_depth	1X
2	97860001	97920000	duplication	5kb mate-pair	discordant_read_pair&read_depth	1X
2	97869230	97874445	deletion	5kb mate-pair	discordant_read_pair&read_depth	1X
2	109686314	109695453	deletion	5kb mate-pair	discordant_read_pair&read_depth	1X
2	110685001	110740000	deletion	5kb mate-pair	discordant_read_pair&read_depth	1X
2	110985001	111025000	deletion	5kb mate-pair	discordant_read_pair&read_depth	1X
2	111150001	111200000	deletion	5kb mate-pair	discordant_read_pair&read_depth	1X
2	123476572	123482616	deletion	5kb mate-pair	discordant_read_pair&read_depth	1X
2	126443250	126453307	deletion	5kb mate-pair	discordant_read_pair&read_depth	1X
2	127674471	127677347	deletion	5kb mate-pair	discordant_read_pair&read_depth	1X
2	129638369	129646667	deletion	5kb mate-pair	discordant_read_pair&read_depth	1X
2	130241911	130251501	deletion	5kb mate-pair	discordant_read_pair&read_depth	1X
2	131330001	131415000	duplication	5kb mate-pair	discordant_read_pair&read_depth	1X
2	131614484	131622360	deletion	5kb mate-pair	discordant_read_pair&read_depth	1X
2	133671649	133676328	deletion	5kb mate-pair	discordant_read_pair&read_depth	1X
2	134966721	134970985	deletion	5kb mate-pair	discordant_read_pair&read_depth	1X
2	146862479	146877133	deletion	5kb mate-pair	discordant_read_pair&read_depth	1X
2	151030899	151038308	deletion	5kb mate-pair	discordant_read_pair&read_depth	1X
2	155818117	155830686	deletion	5kb mate-pair	discordant_read_pair&read_depth	1X
2	160149062	160155592	deletion	5kb mate-pair	discordant_read_pair&read_depth	1X
2	167494513	167501293	duplication	5kb mate-pair	discordant_read_pair&read_depth	1X
2	170104595	170112143	deletion	5kb mate-pair	discordant_read_pair&read_depth	1X
2	173179057	173186632	deletion	5kb mate-pair	discordant_read_pair&read_depth	1X
2	177263819	177272040	deletion	5kb mate-pair	discordant_read_pair&read_depth	1X
2	180065367	180081852	deletion	5kb mate-pair	discordant_read_pair&read_depth	1X
2	184083854	184091641	deletion	5kb mate-pair	discordant_read_pair&read_depth	1X
2	194689314	194699000	deletion	5kb mate-pair	discordant_read_pair&read_depth	1X
2	204180087	204192107	deletion	5kb mate-pair	discordant_read_pair&read_depth	1X
2	208350834	208359655	deletion	5kb mate-pair	discordant_read_pair&read_depth	1X
2	209940414	209949500	deletion	5kb mate-pair	discordant_read_pair&read_depth	1X
2	217089847	217092643	deletion	5kb mate-pair	discordant_read_pair&read_depth	1X
2	220051184	220057311	deletion	5kb mate-pair	discordant_read_pair&read_depth	1X
3	228088	234734	deletion	5kb mate-pair	discordant_read_pair&read_depth	1X
3	4066392	4069549	deletion	5kb mate-pair	discordant_read_pair&read_depth	1X
3	6649592	6656784	deletion	5kb mate-pair	discordant_read_pair&read_depth	1X
3	11108242	11112747	deletion	5kb mate-pair	discordant_read_pair&read_depth	1X
3	22092306	22098136	deletion	5kb mate-pair	discordant_read_pair&read_depth	1X
3	32101425	32108969	deletion	5kb mate-pair	discordant_read_pair&read_depth	1X
3	47490638	47493452	deletion	5kb mate-pair	discordant_read_pair&read_depth	1X
3	65188158	65215034	deletion	5kb mate-pair	discordant_read_pair&read_depth	1X
3	67493665	67497795	deletion	5kb mate-pair	discordant_read_pair&read_depth	1X
3	68634337	68641884	deletion	5kb mate-pair	discordant_read_pair&read_depth	1X
3	68739448	68748470	deletion	5kb mate-pair	discordant_read_pair&read_depth	1X
3	75680001	75815000	duplication	5kb mate-pair	discordant_read_pair&read_depth	1X
3	89509611	89517308	deletion	5kb mate-pair	discordant_read_pair&read_depth	1X
3	98410221	98417592	deletion	5kb mate-pair	discordant_read_pair&read_depth	1X
3	98898360	98902733	deletion	5kb mate-pair	discordant_read_pair&read_depth	1X
3	98943575	98949518	deletion	5kb mate-pair	discordant_read_pair&read_depth	1X
3	111243483	111250403	deletion	5kb mate-pair	discordant_read_pair&read_depth	1X
3	129763327	129807012	deletion	5kb mate-pair	discordant_read_pair&read_depth	1X
3	131708178	131713939	deletion	5kb mate-pair	discordant_read_pair&read_depth	1X
3	136020807	136026432	deletion	5kb mate-pair	discordant_read_pair&read_depth	1X
3	146384497	146391308	deletion	5kb mate-pair	discordant_read_pair&read_depth	1X
3	148278816	148285528	deletion	5kb mate-pair	discordant_read_pair&read_depth	1X
3	162515001	162625000	deletion	5kb mate-pair	discordant_read_pair&read_depth	1X
3	162525521	162548184	deletion	5kb mate-pair	discordant_read_pair&read_depth	1X
3	162716668	162723904	deletion	5kb mate-pair	discordant_read_pair&read_depth	1X
3	162764866	162769218	deletion	5kb mate-pair	discordant_read_pair&read_depth	1X
3	177293340	177297918	deletion	5kb mate-pair	discordant_read_pair&read_depth	1X
3	186580496	186585522	deletion	5kb mate-pair	discordant_read_pair&read_depth	1X
3	189736185	189741489	deletion	5kb mate-pair	discordant_read_pair&read_depth	1X
3	192875083	192885663	deletion	5kb mate-pair	discordant_read_pair&read_depth	1X
3	195195001	195230000	deletion	5kb mate-pair	discordant_read_pair&read_depth	1X
3	196933512	196939487	deletion	5kb mate-pair	discordant_read_pair&read_depth	1X
4	15001	70000	duplication	5kb mate-pair	discordant_read_pair&read_depth	1X
4	3613035	3620780	deletion	5kb mate-pair	discordant_read_pair&read_depth	1X
4	6896570	6901533	deletion	5kb mate-pair	discordant_read_pair&read_depth	1X
4	9160001	9215000	deletion	5kb mate-pair	discordant_read_pair&read_depth	1X
4	9325001	9370000	duplication	5kb mate-pair	discordant_read_pair&read_depth	1X
4	9453412	9482345	deletion	5kb mate-pair	discordant_read_pair&read_depth	1X
4	10210757	10236004	deletion	5kb mate-pair	discordant_read_pair&read_depth	1X
4	10392278	10403011	deletion	5kb mate-pair	discordant_read_pair&read_depth	1X
4	21159630	21168602	deletion	5kb mate-pair	discordant_read_pair&read_depth	1X
4	34683538	34688431	duplication	5kb mate-pair	discordant_read_pair&read_depth	1X
4	34779652	34829224	deletion	5kb mate-pair	discordant_read_pair&read_depth	1X
4	59943855	59951987	deletion	5kb mate-pair	discordant_read_pair&read_depth	1X
4	61329943	61333421	deletion	5kb mate-pair	discordant_read_pair&read_depth	1X
4	61939059	61942403	deletion	5kb mate-pair	discordant_read_pair&read_depth	1X
4	69375001	69490000	deletion	5kb mate-pair	discordant_read_pair&read_depth	1X
4	70125001	70230000	deletion	5kb mate-pair	discordant_read_pair&read_depth	1X
4	75642729	75649460	deletion	5kb mate-pair	discordant_read_pair&read_depth	1X
4	79268912	79275441	deletion	5kb mate-pair	discordant_read_pair&read_depth	1X
4	80887964	80894164	deletion	5kb mate-pair	discordant_read_pair&read_depth	1X
4	86975476	86981695	deletion	5kb mate-pair	discordant_read_pair&read_depth	1X
4	88266772	88274540	deletion	5kb mate-pair	discordant_read_pair&read_depth	1X
4	91596672	91602915	deletion	5kb mate-pair	discordant_read_pair&read_depth	1X
4	91930492	91935871	deletion	5kb mate-pair	discordant_read_pair&read_depth	1X
4	103873074	103877163	deletion	5kb mate-pair	discordant_read_pair&read_depth	1X
4	107603679	107609469	deletion	5kb mate-pair	discordant_read_pair&read_depth	1X
4	108127706	108131797	deletion	5kb mate-pair	discordant_read_pair&read_depth	1X
4	108276404	108279533	deletion	5kb mate-pair	discordant_read_pair&read_depth	1X
4	113497204	113501797	deletion	5kb mate-pair	discordant_read_pair&read_depth	1X
4	115927612	115932474	deletion	5kb mate-pair	discordant_read_pair&read_depth	1X
4	116163990	116177713	deletion	5kb mate-pair	discordant_read_pair&read_depth	1X
4	139468618	139473625	deletion	5kb mate-pair	discordant_read_pair&read_depth	1X
4	145315759	145320043	deletion	5kb mate-pair	discordant_read_pair&read_depth	1X
4	161878465	161885251	deletion	5kb mate-pair	discordant_read_pair&read_depth	1X
4	163393742	163398547	deletion	5kb mate-pair	discordant_read_pair&read_depth	1X
4	167675514	167684751	deletion	5kb mate-pair	discordant_read_pair&read_depth	1X
4	172988331	172992940	deletion	5kb mate-pair	discordant_read_pair&read_depth	1X
4	173425003	173433654	deletion	5kb mate-pair	discordant_read_pair&read_depth	1X
4	187092199	187098347	deletion	5kb mate-pair	discordant_read_pair&read_depth	1X
4	190057838	190064546	deletion	5kb mate-pair	discordant_read_pair&read_depth	1X
4	190470001	190685000	duplication	5kb mate-pair	discordant_read_pair&read_depth	1X
4	190604040	190610434	deletion	5kb mate-pair	discordant_read_pair&read_depth	1X
4	190800001	191045000	duplication	5kb mate-pair	discordant_read_pair&read_depth	1X
5	1968357	1972017	deletion	5kb mate-pair	discordant_read_pair&read_depth	1X
5	12810938	12821641	deletion	5kb mate-pair	discordant_read_pair&read_depth	1X
5	13416151	13423111	deletion	5kb mate-pair	discordant_read_pair&read_depth	1X
5	17712957	17715727	duplication	5kb mate-pair	discordant_read_pair&read_depth	1X
5	24370498	24373574	deletion	5kb mate-pair	discordant_read_pair&read_depth	1X
5	26796590	26804618	deletion	5kb mate-pair	discordant_read_pair&read_depth	1X
5	34304425	34309002	deletion	5kb mate-pair	discordant_read_pair&read_depth	1X
5	57323461	57334083	deletion	5kb mate-pair	discordant_read_pair&read_depth	1X
5	57679959	57687483	deletion	5kb mate-pair	discordant_read_pair&read_depth	1X
5	63697878	63701751	deletion	5kb mate-pair	discordant_read_pair&read_depth	1X
5	83947957	83955650	deletion	5kb mate-pair	discordant_read_pair&read_depth	1X
5	90499547	90503330	deletion	5kb mate-pair	discordant_read_pair&read_depth	1X
5	98839466	98842896	deletion	5kb mate-pair	discordant_read_pair&read_depth	1X
5	103854043	103860387	deletion	5kb mate-pair	discordant_read_pair&read_depth	1X
5	104431654	104503734	deletion	5kb mate-pair	discordant_read_pair&read_depth	1X
5	106234546	106240580	deletion	5kb mate-pair	discordant_read_pair&read_depth	1X
5	117386720	117393890	deletion	5kb mate-pair	discordant_read_pair&read_depth	1X
5	135114661	135121485	deletion	5kb mate-pair	discordant_read_pair&read_depth	1X
5	137806359	137817890	deletion	5kb mate-pair	discordant_read_pair&read_depth	1X
5	178108488	178113507	deletion	5kb mate-pair	discordant_read_pair&read_depth	1X
6	255001	380000	duplication	5kb mate-pair	discordant_read_pair&read_depth	1X
6	23742023	23746748	deletion	5kb mate-pair	discordant_read_pair&read_depth	1X
6	24811798	24818505	deletion	5kb mate-pair	discordant_read_pair&read_depth	1X
6	29685405	29688244	deletion	5kb mate-pair	discordant_read_pair&read_depth	1X
6	29841400	29850475	deletion	5kb mate-pair	discordant_read_pair&read_depth	1X
6	31421416	31424741	deletion	5kb mate-pair	discordant_read_pair&read_depth	1X
6	32455001	32580000	deletion	5kb mate-pair	discordant_read_pair&read_depth	1X
6	32561561	32567187	deletion	5kb mate-pair	discordant_read_pair&read_depth	1X
6	32590001	32635000	deletion	5kb mate-pair	discordant_read_pair&read_depth	1X
6	33937478	33943033	deletion	5kb mate-pair	discordant_read_pair&read_depth	1X
6	35756800	35766081	duplication	5kb mate-pair	discordant_read_pair&read_depth	1X
6	48930374	48938562	deletion	5kb mate-pair	discordant_read_pair&read_depth	1X
6	51739334	51747181	deletion	5kb mate-pair	discordant_read_pair&read_depth	1X
6	53928347	53934830	deletion	5kb mate-pair	discordant_read_pair&read_depth	1X
6	55825160	55847663	deletion	5kb mate-pair	discordant_read_pair&read_depth	1X
6	57205001	57610000	duplication	5kb mate-pair	discordant_read_pair&read_depth	1X
6	57284712	57289490	deletion	5kb mate-pair	discordant_read_pair&read_depth	1X
6	57296775	57301715	deletion	5kb mate-pair	discordant_read_pair&read_depth	1X
6	57423021	57429280	deletion	5kb mate-pair	discordant_read_pair&read_depth	1X
6	57622849	57629380	deletion	5kb mate-pair	discordant_read_pair&read_depth	1X
6	58422558	58429138	deletion	5kb mate-pair	discordant_read_pair&read_depth	1X
6	66398285	66405154	deletion	5kb mate-pair	discordant_read_pair&read_depth	1X
6	67007531	67049062	deletion	5kb mate-pair	discordant_read_pair&read_depth	1X
6	72862972	72875204	deletion	5kb mate-pair	discordant_read_pair&read_depth	1X
6	74613601	74620518	deletion	5kb mate-pair	discordant_read_pair&read_depth	1X
6	77097185	77103373	deletion	5kb mate-pair	discordant_read_pair&read_depth	1X
6	78966432	79037454	deletion	5kb mate-pair	discordant_read_pair&read_depth	1X
6	85318041	85325785	deletion	5kb mate-pair	discordant_read_pair&read_depth	1X
6	86708514	86715333	deletion	5kb mate-pair	discordant_read_pair&read_depth	1X
6	101933382	101939579	deletion	5kb mate-pair	discordant_read_pair&read_depth	1X
6	103737281	103763663	deletion	5kb mate-pair	discordant_read_pair&read_depth	1X
6	103938999	103944810	deletion	5kb mate-pair	discordant_read_pair&read_depth	1X
6	105260524	105264186	deletion	5kb mate-pair	discordant_read_pair&read_depth	1X
6	129319531	129326844	deletion	5kb mate-pair	discordant_read_pair&read_depth	1X
6	132114014	132119020	deletion	5kb mate-pair	discordant_read_pair&read_depth	1X
6	132374418	132379151	deletion	5kb mate-pair	discordant_read_pair&read_depth	1X
6	132705721	132713025	deletion	5kb mate-pair	discordant_read_pair&read_depth	1X
6	153029798	153034618	deletion	5kb mate-pair	discordant_read_pair&read_depth	1X
6	165724387	165733053	deletion	5kb mate-pair	discordant_read_pair&read_depth	1X
6	171005001	171120000	deletion	5kb mate-pair	discordant_read_pair&read_depth	1X
7	1855801	1863652	deletion	5kb mate-pair	discordant_read_pair&read_depth	1X
7	13021907	13029127	deletion	5kb mate-pair	discordant_read_pair&read_depth	1X
7	25056580	25059995	deletion	5kb mate-pair	discordant_read_pair&read_depth	1X
7	26136786	26145819	deletion	5kb mate-pair	discordant_read_pair&read_depth	1X
7	31315565	31319265	deletion	5kb mate-pair	discordant_read_pair&read_depth	1X
7	32390037	32393553	deletion	5kb mate-pair	discordant_read_pair&read_depth	1X
7	49718817	49725924	deletion	5kb mate-pair	discordant_read_pair&read_depth	1X
7	51593776	51599238	deletion	5kb mate-pair	discordant_read_pair&read_depth	1X
7	56217063	56221571	deletion	5kb mate-pair	discordant_read_pair&read_depth	1X
7	56761925	56770302	deletion	5kb mate-pair	discordant_read_pair&read_depth	1X
7	57605001	57805000	duplication	5kb mate-pair	discordant_read_pair&read_depth	1X
7	64950001	65060000	duplication	5kb mate-pair	discordant_read_pair&read_depth	1X
7	73828246	73831869	deletion	5kb mate-pair	discordant_read_pair&read_depth	1X
7	93416928	93423213	deletion	5kb mate-pair	discordant_read_pair&read_depth	1X
7	96475900	96482143	deletion	5kb mate-pair	discordant_read_pair&read_depth	1X
7	96542367	96546823	deletion	5kb mate-pair	discordant_read_pair&read_depth	1X
7	101000393	101005790	deletion	5kb mate-pair	discordant_read_pair&read_depth	1X
7	101290001	101330000	deletion	5kb mate-pair	discordant_read_pair&read_depth	1X
7	110181569	110188998	deletion	5kb mate-pair	discordant_read_pair&read_depth	1X
7	113415846	113422717	deletion	5kb mate-pair	discordant_read_pair&read_depth	1X
7	126045804	126051645	deletion	5kb mate-pair	discordant_read_pair&read_depth	1X
7	127214881	127218220	deletion	5kb mate-pair	discordant_read_pair&read_depth	1X
7	141765265	141798054	deletion	5kb mate-pair	discordant_read_pair&read_depth	1X
7	143300001	143410000	deletion	5kb mate-pair	discordant_read_pair&read_depth	1X
7	143830001	144075000	duplication	5kb mate-pair	discordant_read_pair&read_depth	1X
7	148072843	148076343	deletion	5kb mate-pair	discordant_read_pair&read_depth	1X
7	156386942	156395377	deletion	5kb mate-pair	discordant_read_pair&read_depth	1X
8	594254	599759	deletion	5kb mate-pair	discordant_read_pair&read_depth	1X
8	963569	968623	deletion	5kb mate-pair	discordant_read_pair&read_depth	1X
8	1340980	1356139	deletion	5kb mate-pair	discordant_read_pair&read_depth	1X
8	6991544	6995655	deletion	5kb mate-pair	discordant_read_pair&read_depth	1X
8	7050001	7110000	deletion	5kb mate-pair	discordant_read_pair&read_depth	1X
8	11895001	11975000	deletion	5kb mate-pair	discordant_read_pair&read_depth	1X
8	12085001	12250000	deletion	5kb mate-pair	discordant_read_pair&read_depth	1X
8	12355001	12455000	duplication	5kb mate-pair	discordant_read_pair&read_depth	1X
8	24971864	24991621	deletion	5kb mate-pair	discordant_read_pair&read_depth	1X
8	25066395	25072079	deletion	5kb mate-pair	discordant_read_pair&read_depth	1X
8	32679738	32691960	deletion	5kb mate-pair	discordant_read_pair&read_depth	1X
8	39230001	39385000	deletion	5kb mate-pair	discordant_read_pair&read_depth	1X
8	39882996	39891116	deletion	5kb mate-pair	discordant_read_pair&read_depth	1X
8	40773722	40779875	deletion	5kb mate-pair	discordant_read_pair&read_depth	1X
8	42189926	42194663	deletion	5kb mate-pair	discordant_read_pair&read_depth	1X
8	47525781	47544486	duplication	5kb mate-pair	discordant_read_pair&read_depth	1X
8	73787656	73793816	deletion	5kb mate-pair	discordant_read_pair&read_depth	1X
8	75362553	75367143	deletion	5kb mate-pair	discordant_read_pair&read_depth	1X
8	86725001	86840000	duplication	5kb mate-pair	discordant_read_pair&read_depth	1X
8	94071211	94077365	deletion	5kb mate-pair	discordant_read_pair&read_depth	1X
8	96874955	96880791	deletion	5kb mate-pair	discordant_read_pair&read_depth	1X
8	112294055	112297222	deletion	5kb mate-pair	discordant_read_pair&read_depth	1X
8	120154502	120161473	deletion	5kb mate-pair	discordant_read_pair&read_depth	1X
8	126594748	126602667	deletion	5kb mate-pair	discordant_read_pair&read_depth	1X
8	129464956	129471263	deletion	5kb mate-pair	discordant_read_pair&read_depth	1X
8	135082917	135089371	deletion	5kb mate-pair	discordant_read_pair&read_depth	1X
8	137159658	137163907	deletion	5kb mate-pair	discordant_read_pair&read_depth	1X
9	15814742	15822742	deletion	5kb mate-pair	discordant_read_pair&read_depth	1X
9	17908362	17912854	deletion	5kb mate-pair	discordant_read_pair&read_depth	1X
9	22496001	22504597	deletion	5kb mate-pair	discordant_read_pair&read_depth	1X
9	23362632	23377894	deletion	5kb mate-pair	discordant_read_pair&read_depth	1X
9	29091709	29098197	deletion	5kb mate-pair	discordant_read_pair&read_depth	1X
9	39085001	39185000	duplication	5kb mate-pair	discordant_read_pair&read_depth	1X
9	41085001	41220000	deletion	5kb mate-pair	discordant_read_pair&read_depth	1X
9	41740001	41805000	deletion	5kb mate-pair	discordant_read_pair&read_depth	1X
9	42140001	42240000	duplication	5kb mate-pair	discordant_read_pair&read_depth	1X
9	42375001	42610000	duplication	5kb mate-pair	discordant_read_pair&read_depth	1X
9	42875001	43165000	duplication	5kb mate-pair	discordant_read_pair&read_depth	1X
9	43925001	44060000	deletion	5kb mate-pair	discordant_read_pair&read_depth	1X
9	44475001	44730000	deletion	5kb mate-pair	discordant_read_pair&read_depth	1X
9	45350001	45485000	duplication	5kb mate-pair	discordant_read_pair&read_depth	1X
9	66080001	66240000	deletion	5kb mate-pair	discordant_read_pair&read_depth	1X
9	66345001	66455000	deletion	5kb mate-pair	discordant_read_pair&read_depth	1X
9	66455001	66585000	duplication	5kb mate-pair	discordant_read_pair&read_depth	1X
9	66665001	66865000	duplication	5kb mate-pair	discordant_read_pair&read_depth	1X
9	67250001	67345000	duplication	5kb mate-pair	discordant_read_pair&read_depth	1X
9	67780001	67980000	duplication	5kb mate-pair	discordant_read_pair&read_depth	1X
9	68325001	68505000	duplication	5kb mate-pair	discordant_read_pair&read_depth	1X
9	68990001	69275000	duplication	5kb mate-pair	discordant_read_pair&read_depth	1X
9	69380001	69465000	duplication	5kb mate-pair	discordant_read_pair&read_depth	1X
9	69475001	69585000	duplication	5kb mate-pair	discordant_read_pair&read_depth	1X
9	70560001	70725000	duplication	5kb mate-pair	discordant_read_pair&read_depth	1X
9	70840001	70940000	duplication	5kb mate-pair	discordant_read_pair&read_depth	1X
9	71738095	71743720	deletion	5kb mate-pair	discordant_read_pair&read_depth	1X
9	73320001	73345000	deletion	5kb mate-pair	discordant_read_pair&read_depth	1X
9	78918772	78922642	deletion	5kb mate-pair	discordant_read_pair&read_depth	1X
9	79770346	79777443	duplication	5kb mate-pair	discordant_read_pair&read_depth	1X
9	83966091	83970821	deletion	5kb mate-pair	discordant_read_pair&read_depth	1X
9	96499509	96503529	deletion	5kb mate-pair	discordant_read_pair&read_depth	1X
9	101308282	101311707	deletion	5kb mate-pair	discordant_read_pair&read_depth	1X
9	104714847	104724632	deletion	5kb mate-pair	discordant_read_pair&read_depth	1X
9	110537281	110540889	deletion	5kb mate-pair	discordant_read_pair&read_depth	1X
9	133029851	133034822	deletion	5kb mate-pair	discordant_read_pair&read_depth	1X
10	5287199	5294145	deletion	5kb mate-pair	discordant_read_pair&read_depth	1X
10	5888656	5892919	deletion	5kb mate-pair	discordant_read_pair&read_depth	1X
10	6411525	6417645	deletion	5kb mate-pair	discordant_read_pair&read_depth	1X
10	31246301	31253582	deletion	5kb mate-pair	discordant_read_pair&read_depth	1X
10	32257874	32260768	deletion	5kb mate-pair	discordant_read_pair&read_depth	1X
10	38870001	39155000	duplication	5kb mate-pair	discordant_read_pair&read_depth	1X
10	42605001	42685000	duplication	5kb mate-pair	discordant_read_pair&read_depth	1X
10	42699750	42717464	deletion	5kb mate-pair	discordant_read_pair&read_depth	1X
10	46950001	47155000	duplication	5kb mate-pair	discordant_read_pair&read_depth	1X
10	47705001	47950000	deletion	5kb mate-pair	discordant_read_pair&read_depth	1X
10	48010001	48295000	deletion	5kb mate-pair	discordant_read_pair&read_depth	1X
10	51135001	51355000	deletion	5kb mate-pair	discordant_read_pair&read_depth	1X
10	51595001	51730000	deletion	5kb mate-pair	discordant_read_pair&read_depth	1X
10	51845001	52000000	deletion	5kb mate-pair	discordant_read_pair&read_depth	1X
10	53203047	53214224	deletion	5kb mate-pair	discordant_read_pair&read_depth	1X
10	71280045	71291703	deletion	5kb mate-pair	discordant_read_pair&read_depth	1X
10	78255320	78261717	deletion	5kb mate-pair	discordant_read_pair&read_depth	1X
10	90795004	90801633	duplication	5kb mate-pair	discordant_read_pair&read_depth	1X
10	94134031	94137731	deletion	5kb mate-pair	discordant_read_pair&read_depth	1X
10	99034726	99037439	deletion	5kb mate-pair	discordant_read_pair&read_depth	1X
10	100686107	100704842	deletion	5kb mate-pair	discordant_read_pair&read_depth	1X
10	111572078	111578722	deletion	5kb mate-pair	discordant_read_pair&read_depth	1X
10	114112087	114116860	deletion	5kb mate-pair	discordant_read_pair&read_depth	1X
10	118764769	118769597	deletion	5kb mate-pair	discordant_read_pair&read_depth	1X
10	132635458	132642534	deletion	5kb mate-pair	discordant_read_pair&read_depth	1X
10	132908828	132913770	deletion	5kb mate-pair	discordant_read_pair&read_depth	1X
10	134947947	134954089	deletion	5kb mate-pair	discordant_read_pair&read_depth	1X
11	1914360	1936947	deletion	5kb mate-pair	discordant_read_pair&read_depth	1X
11	3270001	3355000	deletion	5kb mate-pair	discordant_read_pair&read_depth	1X
11	4250001	4340000	deletion	5kb mate-pair	discordant_read_pair&read_depth	1X
11	4966288	4978021	deletion	5kb mate-pair	discordant_read_pair&read_depth	1X
11	24349376	24355632	deletion	5kb mate-pair	discordant_read_pair&read_depth	1X
11	29006751	29013069	deletion	5kb mate-pair	discordant_read_pair&read_depth	1X
11	31392956	31397749	deletion	5kb mate-pair	discordant_read_pair&read_depth	1X
11	47056607	47063924	deletion	5kb mate-pair	discordant_read_pair&read_depth	1X
11	48600807	48604484	deletion	5kb mate-pair	discordant_read_pair&read_depth	1X
11	55365001	55460000	deletion	5kb mate-pair	discordant_read_pair&read_depth	1X
11	67639483	67645897	deletion	5kb mate-pair	discordant_read_pair&read_depth	1X
11	81853953	81863371	deletion	5kb mate-pair	discordant_read_pair&read_depth	1X
11	92869476	92875952	deletion	5kb mate-pair	discordant_read_pair&read_depth	1X
11	93153135	93160240	deletion	5kb mate-pair	discordant_read_pair&read_depth	1X
11	93970615	93972273	duplication	5kb mate-pair	discordant_read_pair&read_depth	1X
11	95169282	95175865	deletion	5kb mate-pair	discordant_read_pair&read_depth	1X
11	101565883	101575309	deletion	5kb mate-pair	discordant_read_pair&read_depth	1X
11	104267548	104273459	deletion	5kb mate-pair	discordant_read_pair&read_depth	1X
11	124774058	124778844	deletion	5kb mate-pair	discordant_read_pair&read_depth	1X
12	292117	298060	deletion	5kb mate-pair	discordant_read_pair&read_depth	1X
12	1193460	1201310	deletion	5kb mate-pair	discordant_read_pair&read_depth	1X
12	8555443	8591580	deletion	5kb mate-pair	discordant_read_pair&read_depth	1X
12	9550001	9735000	deletion	5kb mate-pair	discordant_read_pair&read_depth	1X
12	11235001	11250000	deletion	5kb mate-pair	discordant_read_pair&read_depth	1X
12	11510001	11545000	deletion	5kb mate-pair	discordant_read_pair&read_depth	1X
12	45902698	45910494	deletion	5kb mate-pair	discordant_read_pair&read_depth	1X
12	70594391	70599683	deletion	5kb mate-pair	discordant_read_pair&read_depth	1X
12	80154968	80162055	duplication	5kb mate-pair	discordant_read_pair&read_depth	1X
12	84591769	84596076	deletion	5kb mate-pair	discordant_read_pair&read_depth	1X
12	90485271	90493206	deletion	5kb mate-pair	discordant_read_pair&read_depth	1X
12	96232944	96236840	deletion	5kb mate-pair	discordant_read_pair&read_depth	1X
12	96339593	96343352	deletion	5kb mate-pair	discordant_read_pair&read_depth	1X
12	98955308	98959624	deletion	5kb mate-pair	discordant_read_pair&read_depth	1X
12	99793476	99802808	deletion	5kb mate-pair	discordant_read_pair&read_depth	1X
12	100287529	100292064	deletion	5kb mate-pair	discordant_read_pair&read_depth	1X
12	102102311	102108703	deletion	5kb mate-pair	discordant_read_pair&read_depth	1X
13	23631985	23639342	deletion	5kb mate-pair	discordant_read_pair&read_depth	1X
13	30214849	30222088	deletion	5kb mate-pair	discordant_read_pair&read_depth	1X
13	39056899	39060825	deletion	5kb mate-pair	discordant_read_pair&read_depth	1X
13	51069264	51075231	deletion	5kb mate-pair	discordant_read_pair&read_depth	1X
13	72476661	72480822	deletion	5kb mate-pair	discordant_read_pair&read_depth	1X
13	72806605	72812640	deletion	5kb mate-pair	discordant_read_pair&read_depth	1X
13	72842580	72847455	deletion	5kb mate-pair	discordant_read_pair&read_depth	1X
13	83165863	83172518	deletion	5kb mate-pair	discordant_read_pair&read_depth	1X
13	99252627	99258821	deletion	5kb mate-pair	discordant_read_pair&read_depth	1X
14	19000001	19125000	duplication	5kb mate-pair	discordant_read_pair&read_depth	1X
14	20549283	20556821	deletion	5kb mate-pair	discordant_read_pair&read_depth	1X
14	23105027	23110831	deletion	5kb mate-pair	discordant_read_pair&read_depth	1X
14	24450001	24475000	deletion	5kb mate-pair	discordant_read_pair&read_depth	1X
14	40609807	40617744	deletion	5kb mate-pair	discordant_read_pair&read_depth	1X
14	56907758	56914499	deletion	5kb mate-pair	discordant_read_pair&read_depth	1X
14	65359646	65364646	deletion	5kb mate-pair	discordant_read_pair&read_depth	1X
14	74239702	74246949	deletion	5kb mate-pair	discordant_read_pair&read_depth	1X
14	80105130	80116793	deletion	5kb mate-pair	discordant_read_pair&read_depth	1X
14	82499083	82503690	deletion	5kb mate-pair	discordant_read_pair&read_depth	1X
14	105576654	105579912	deletion	5kb mate-pair	discordant_read_pair&read_depth	1X
14	106330832	106369750	deletion	5kb mate-pair	discordant_read_pair&read_depth	1X
15	20000001	20150000	duplication	5kb mate-pair	discordant_read_pair&read_depth	1X
15	20400001	20580000	duplication	5kb mate-pair	discordant_read_pair&read_depth	1X
15	20581397	20589898	deletion	5kb mate-pair	discordant_read_pair&read_depth	1X
15	55218153	55225034	deletion	5kb mate-pair	discordant_read_pair&read_depth	1X
15	68425533	68429536	deletion	5kb mate-pair	discordant_read_pair&read_depth	1X
15	71707738	71713782	deletion	5kb mate-pair	discordant_read_pair&read_depth	1X
15	76884426	76898751	deletion	5kb mate-pair	discordant_read_pair&read_depth	1X
15	83025001	83120000	deletion	5kb mate-pair	discordant_read_pair&read_depth	1X
15	83175001	83215000	deletion	5kb mate-pair	discordant_read_pair&read_depth	1X
15	83551368	83557942	deletion	5kb mate-pair	discordant_read_pair&read_depth	1X
15	86056440	86060235	deletion	5kb mate-pair	discordant_read_pair&read_depth	1X
15	101094532	101099101	deletion	5kb mate-pair	discordant_read_pair&read_depth	1X
15	102511637	102521018	duplication	5kb mate-pair	discordant_read_pair&read_depth	1X
16	15020001	15130000	duplication	5kb mate-pair	discordant_read_pair&read_depth	1X
16	16934097	16940412	deletion	5kb mate-pair	discordant_read_pair&read_depth	1X
16	18830906	18839601	deletion	5kb mate-pair	discordant_read_pair&read_depth	1X
16	19945315	19969239	deletion	5kb mate-pair	discordant_read_pair&read_depth	1X
16	21520001	21595000	duplication	5kb mate-pair	discordant_read_pair&read_depth	1X
16	22550001	22710000	duplication	5kb mate-pair	discordant_read_pair&read_depth	1X
16	25339551	25343811	deletion	5kb mate-pair	discordant_read_pair&read_depth	1X
16	34475001	34760000	duplication	5kb mate-pair	discordant_read_pair&read_depth	1X
16	62544203	62551034	deletion	5kb mate-pair	discordant_read_pair&read_depth	1X
16	76538840	76544031	deletion	5kb mate-pair	discordant_read_pair&read_depth	1X
17	193447	199952	deletion	5kb mate-pair	discordant_read_pair&read_depth	1X
17	12353145	12359648	deletion	5kb mate-pair	discordant_read_pair&read_depth	1X
17	21190001	21255000	duplication	5kb mate-pair	discordant_read_pair&read_depth	1X
17	21305001	21350000	duplication	5kb mate-pair	discordant_read_pair&read_depth	1X
17	25534548	25540526	deletion	5kb mate-pair	discordant_read_pair&read_depth	1X
17	26779534	26783578	deletion	5kb mate-pair	discordant_read_pair&read_depth	1X
17	34505001	34735000	deletion	5kb mate-pair	discordant_read_pair&read_depth	1X
17	35754956	35759084	deletion	5kb mate-pair	discordant_read_pair&read_depth	1X
17	36290001	36410000	duplication	5kb mate-pair	discordant_read_pair&read_depth	1X
17	39421493	39432343	deletion	5kb mate-pair	discordant_read_pair&read_depth	1X
17	41399683	41401200	duplication	5kb mate-pair	discordant_read_pair&read_depth	1X
17	41439344	41442268	duplication	5kb mate-pair	discordant_read_pair&read_depth	1X
17	44650001	44760000	deletion	5kb mate-pair	discordant_read_pair&read_depth	1X
17	51852089	51861195	deletion	5kb mate-pair	discordant_read_pair&read_depth	1X
18	15404764	15410093	duplication	5kb mate-pair	discordant_read_pair&read_depth	1X
18	30494959	30501296	deletion	5kb mate-pair	discordant_read_pair&read_depth	1X
18	38259243	38267122	deletion	5kb mate-pair	discordant_read_pair&read_depth	1X
18	38863043	38868480	deletion	5kb mate-pair	discordant_read_pair&read_depth	1X
18	47694961	47698566	deletion	5kb mate-pair	discordant_read_pair&read_depth	1X
18	51952815	51957348	deletion	5kb mate-pair	discordant_read_pair&read_depth	1X
18	63723154	63732480	deletion	5kb mate-pair	discordant_read_pair&read_depth	1X
18	68382847	68387876	deletion	5kb mate-pair	discordant_read_pair&read_depth	1X
18	76661412	76669186	deletion	5kb mate-pair	discordant_read_pair&read_depth	1X
19	8340001	8365000	deletion	5kb mate-pair	discordant_read_pair&read_depth	1X
19	12694234	12699218	deletion	5kb mate-pair	discordant_read_pair&read_depth	1X
19	15046260	15050204	deletion	5kb mate-pair	discordant_read_pair&read_depth	1X
19	20505001	20715000	deletion	5kb mate-pair	discordant_read_pair&read_depth	1X
19	29950077	29957312	deletion	5kb mate-pair	discordant_read_pair&read_depth	1X
19	30388494	30393109	deletion	5kb mate-pair	discordant_read_pair&read_depth	1X
19	35659255	35665893	deletion	5kb mate-pair	discordant_read_pair&read_depth	1X
19	36840313	36847364	deletion	5kb mate-pair	discordant_read_pair&read_depth	1X
19	51077886	51083487	deletion	5kb mate-pair	discordant_read_pair&read_depth	1X
19	53688226	53693316	deletion	5kb mate-pair	discordant_read_pair&read_depth	1X
20	2802906	2807452	deletion	5kb mate-pair	discordant_read_pair&read_depth	1X
20	25770001	25825000	deletion	5kb mate-pair	discordant_read_pair&read_depth	1X
20	25865001	25940000	duplication	5kb mate-pair	discordant_read_pair&read_depth	1X
20	26000001	26050000	deletion	5kb mate-pair	discordant_read_pair&read_depth	1X
20	29420001	29490000	duplication	5kb mate-pair	discordant_read_pair&read_depth	1X
20	29535001	29655000	duplication	5kb mate-pair	discordant_read_pair&read_depth	1X
20	29638273	29641517	deletion	5kb mate-pair	discordant_read_pair&read_depth	1X
20	31524830	31530173	deletion	5kb mate-pair	discordant_read_pair&read_depth	1X
20	32814677	32819768	deletion	5kb mate-pair	discordant_read_pair&read_depth	1X
20	42481207	42484819	deletion	5kb mate-pair	discordant_read_pair&read_depth	1X
20	52645862	52659345	deletion	5kb mate-pair	discordant_read_pair&read_depth	1X
20	54434275	54442904	deletion	5kb mate-pair	discordant_read_pair&read_depth	1X
21	9415001	9595000	duplication	5kb mate-pair	discordant_read_pair&read_depth	1X
21	9825001	10035000	duplication	5kb mate-pair	discordant_read_pair&read_depth	1X
21	10085001	10215000	duplication	5kb mate-pair	discordant_read_pair&read_depth	1X
21	10365001	10645000	duplication	5kb mate-pair	discordant_read_pair&read_depth	1X
21	11081210	11117443	deletion	5kb mate-pair	discordant_read_pair&read_depth	1X
21	11088687	11093418	deletion	5kb mate-pair	discordant_read_pair&read_depth	1X
21	11096665	11109091	deletion	5kb mate-pair	discordant_read_pair&read_depth	1X
21	14340001	14450000	duplication	5kb mate-pair	discordant_read_pair&read_depth	1X
21	43348351	43354717	deletion	5kb mate-pair	discordant_read_pair&read_depth	1X
21	44970286	44974547	deletion	5kb mate-pair	discordant_read_pair&read_depth	1X
22	16850001	16960000	duplication	5kb mate-pair	discordant_read_pair&read_depth	1X
22	17770008	17779242	deletion	5kb mate-pair	discordant_read_pair&read_depth	1X
22	20355001	20610000	deletion	5kb mate-pair	discordant_read_pair&read_depth	1X
22	20949396	20954095	deletion	5kb mate-pair	discordant_read_pair&read_depth	1X
22	21580001	21650000	duplication	5kb mate-pair	discordant_read_pair&read_depth	1X
22	22440001	23245000	deletion	5kb mate-pair	discordant_read_pair&read_depth	1X
22	24053910	24060585	duplication	5kb mate-pair	discordant_read_pair&read_depth	1X
22	24270825	24311362	deletion	5kb mate-pair	discordant_read_pair&read_depth	1X
22	37142771	37147928	deletion	5kb mate-pair	discordant_read_pair&read_depth	1X
X	1040001	1210000	deletion	5kb mate-pair	discordant_read_pair&read_depth	1X
X	1754619	1760567	deletion	5kb mate-pair	discordant_read_pair&read_depth	1X
X	2194653	2200923	deletion	5kb mate-pair	discordant_read_pair&read_depth	1X
X	11724674	11731495	deletion	5kb mate-pair	discordant_read_pair&read_depth	1X
X	12433287	12437163	deletion	5kb mate-pair	discordant_read_pair&read_depth	1X
X	67123599	67130444	deletion	5kb mate-pair	discordant_read_pair&read_depth	1X
X	70136829	70142284	deletion	5kb mate-pair	discordant_read_pair&read_depth	1X
X	77121327	77126613	deletion	5kb mate-pair	discordant_read_pair&read_depth	1X
X	78921566	78926150	deletion	5kb mate-pair	discordant_read_pair&read_depth	1X
X	81096485	81103460	deletion	5kb mate-pair	discordant_read_pair&read_depth	1X
X	81982314	81988637	deletion	5kb mate-pair	discordant_read_pair&read_depth	1X
X	85604774	85610146	deletion	5kb mate-pair	discordant_read_pair&read_depth	1X
X	95311188	95319826	deletion	5kb mate-pair	discordant_read_pair&read_depth	1X
X	101055458	101066714	duplication	5kb mate-pair	discordant_read_pair&read_depth	1X
X	120000001	120125000	deletion	5kb mate-pair	discordant_read_pair&read_depth	1X
X	126595701	126603178	deletion	5kb mate-pair	discordant_read_pair&read_depth	1X
X	144421170	144424804	deletion	5kb mate-pair	discordant_read_pair&read_depth	1X
X	152230001	152350000	deletion	5kb mate-pair	discordant_read_pair&read_depth	1X
X	154788890	154803651	deletion	5kb mate-pair	discordant_read_pair&read_depth	1X

## Sheet: 3X 5kb mate-pair
Chr	Start	End	Type	Library	Detection	Coverage
1	75001	100000	deletion	5kb mate-pair	discordant_read_pair&read_depth	3X
1	175001	320000	deletion	5kb mate-pair	discordant_read_pair&read_depth	3X
1	13010001	13170000	deletion	5kb mate-pair	discordant_read_pair&read_depth	3X
1	13220001	13445000	deletion	5kb mate-pair	discordant_read_pair&read_depth	3X
1	13480001	13665000	deletion	5kb mate-pair	discordant_read_pair&read_depth	3X
1	16151339	16155714	deletion	5kb mate-pair	discordant_read_pair&read_depth	3X
1	16855001	17000000	duplication	5kb mate-pair	discordant_read_pair&read_depth	3X
1	16890853	16893934	duplication	5kb mate-pair	discordant_read_pair&read_depth	3X
1	17015001	17125000	duplication	5kb mate-pair	discordant_read_pair&read_depth	3X
1	25590001	25665000	deletion	5kb mate-pair	discordant_read_pair&read_depth	3X
1	35101320	35112080	deletion	5kb mate-pair	discordant_read_pair&read_depth	3X
1	39997590	40001692	deletion	5kb mate-pair	discordant_read_pair&read_depth	3X
1	56829582	56835026	deletion	5kb mate-pair	discordant_read_pair&read_depth	3X
1	66024153	66030487	deletion	5kb mate-pair	discordant_read_pair&read_depth	3X
1	72766317	72811915	deletion	5kb mate-pair	discordant_read_pair&read_depth	3X
1	78648683	78654310	deletion	5kb mate-pair	discordant_read_pair&read_depth	3X
1	81403546	81411047	deletion	5kb mate-pair	discordant_read_pair&read_depth	3X
1	84517794	84524696	deletion	5kb mate-pair	discordant_read_pair&read_depth	3X
1	103785001	104000000	deletion	5kb mate-pair	discordant_read_pair&read_depth	3X
1	108732733	108737509	deletion	5kb mate-pair	discordant_read_pair&read_depth	3X
1	114039594	114046016	deletion	5kb mate-pair	discordant_read_pair&read_depth	3X
1	116229130	116233486	deletion	5kb mate-pair	discordant_read_pair&read_depth	3X
1	121478384	121485439	duplication	5kb mate-pair	discordant_read_pair&read_depth	3X
1	142535001	142730000	duplication	5kb mate-pair	discordant_read_pair&read_depth	3X
1	142780001	142965000	duplication	5kb mate-pair	discordant_read_pair&read_depth	3X
1	142789177	142808235	deletion	5kb mate-pair	discordant_read_pair&read_depth	3X
1	143125001	143285000	duplication	5kb mate-pair	discordant_read_pair&read_depth	3X
1	143345001	143545000	duplication	5kb mate-pair	discordant_read_pair&read_depth	3X
1	144340001	144495000	deletion	5kb mate-pair	discordant_read_pair&read_depth	3X
1	144896259	144906862	deletion	5kb mate-pair	discordant_read_pair&read_depth	3X
1	145092941	145097203	deletion	5kb mate-pair	discordant_read_pair&read_depth	3X
1	145294733	145302997	deletion	5kb mate-pair	discordant_read_pair&read_depth	3X
1	146050001	146305000	deletion	5kb mate-pair	discordant_read_pair&read_depth	3X
1	152555164	152589003	deletion	5kb mate-pair	discordant_read_pair&read_depth	3X
1	152760113	152771126	deletion	5kb mate-pair	discordant_read_pair&read_depth	3X
1	158961212	158966599	deletion	5kb mate-pair	discordant_read_pair&read_depth	3X
1	159012820	159019770	deletion	5kb mate-pair	discordant_read_pair&read_depth	3X
1	180749664	180755411	deletion	5kb mate-pair	discordant_read_pair&read_depth	3X
1	184814591	184821029	deletion	5kb mate-pair	discordant_read_pair&read_depth	3X
1	187715861	187722525	deletion	5kb mate-pair	discordant_read_pair&read_depth	3X
1	189704105	189783663	deletion	5kb mate-pair	discordant_read_pair&read_depth	3X
1	194451029	194454368	deletion	5kb mate-pair	discordant_read_pair&read_depth	3X
1	206282728	206288347	duplication	5kb mate-pair	discordant_read_pair&read_depth	3X
1	207541766	207545624	deletion	5kb mate-pair	discordant_read_pair&read_depth	3X
1	207700001	207745000	deletion	5kb mate-pair	discordant_read_pair&read_depth	3X
1	218182425	218188986	deletion	5kb mate-pair	discordant_read_pair&read_depth	3X
1	222374018	222380607	deletion	5kb mate-pair	discordant_read_pair&read_depth	3X
1	229812540	229821067	deletion	5kb mate-pair	discordant_read_pair&read_depth	3X
1	247850280	247856509	deletion	5kb mate-pair	discordant_read_pair&read_depth	3X
1	248051481	248057762	deletion	5kb mate-pair	discordant_read_pair&read_depth	3X
1	248600001	248670000	duplication	5kb mate-pair	discordant_read_pair&read_depth	3X
1	248670001	248820000	deletion	5kb mate-pair	discordant_read_pair&read_depth	3X
2	1525001	1550000	deletion	5kb mate-pair	discordant_read_pair&read_depth	3X
2	3732734	3738894	deletion	5kb mate-pair	discordant_read_pair&read_depth	3X
2	4212499	4224741	deletion	5kb mate-pair	discordant_read_pair&read_depth	3X
2	4781280	4787388	deletion	5kb mate-pair	discordant_read_pair&read_depth	3X
2	14703995	14711059	deletion	5kb mate-pair	discordant_read_pair&read_depth	3X
2	19185001	19220000	deletion	5kb mate-pair	discordant_read_pair&read_depth	3X
2	21152776	21178322	deletion	5kb mate-pair	discordant_read_pair&read_depth	3X
2	34695651	34736702	deletion	5kb mate-pair	discordant_read_pair&read_depth	3X
2	34797529	34802232	deletion	5kb mate-pair	discordant_read_pair&read_depth	3X
2	35975977	35997164	deletion	5kb mate-pair	discordant_read_pair&read_depth	3X
2	48781534	48785757	deletion	5kb mate-pair	discordant_read_pair&read_depth	3X
2	52749631	52785295	deletion	5kb mate-pair	discordant_read_pair&read_depth	3X
2	59623212	59631228	deletion	5kb mate-pair	discordant_read_pair&read_depth	3X
2	79076456	79081251	deletion	5kb mate-pair	discordant_read_pair&read_depth	3X
2	87630001	87740000	deletion	5kb mate-pair	discordant_read_pair&read_depth	3X
2	89028265	89032434	deletion	5kb mate-pair	discordant_read_pair&read_depth	3X
2	90370001	90505000	duplication	5kb mate-pair	discordant_read_pair&read_depth	3X
2	91715001	91955000	duplication	5kb mate-pair	discordant_read_pair&read_depth	3X
2	91750630	91759762	deletion	5kb mate-pair	discordant_read_pair&read_depth	3X
2	91970001	92105000	duplication	5kb mate-pair	discordant_read_pair&read_depth	3X
2	97860001	97920000	duplication	5kb mate-pair	discordant_read_pair&read_depth	3X
2	97869230	97874445	deletion	5kb mate-pair	discordant_read_pair&read_depth	3X
2	98135001	98165000	deletion	5kb mate-pair	discordant_read_pair&read_depth	3X
2	109689960	109695453	deletion	5kb mate-pair	discordant_read_pair&read_depth	3X
2	110108981	110251422	deletion	5kb mate-pair	discordant_read_pair&read_depth	3X
2	110685001	110735000	deletion	5kb mate-pair	discordant_read_pair&read_depth	3X
2	110985001	111025000	deletion	5kb mate-pair	discordant_read_pair&read_depth	3X
2	111150001	111200000	deletion	5kb mate-pair	discordant_read_pair&read_depth	3X
2	123476572	123482616	deletion	5kb mate-pair	discordant_read_pair&read_depth	3X
2	126443250	126451884	deletion	5kb mate-pair	discordant_read_pair&read_depth	3X
2	129638369	129646272	deletion	5kb mate-pair	discordant_read_pair&read_depth	3X
2	130242085	130251501	deletion	5kb mate-pair	discordant_read_pair&read_depth	3X
2	131350001	131415000	duplication	5kb mate-pair	discordant_read_pair&read_depth	3X
2	131614484	131622010	deletion	5kb mate-pair	discordant_read_pair&read_depth	3X
2	134966721	134970326	deletion	5kb mate-pair	discordant_read_pair&read_depth	3X
2	146862508	146876964	deletion	5kb mate-pair	discordant_read_pair&read_depth	3X
2	151031098	151038308	deletion	5kb mate-pair	discordant_read_pair&read_depth	3X
2	155818936	155830686	deletion	5kb mate-pair	discordant_read_pair&read_depth	3X
2	162135109	162138561	duplication	5kb mate-pair	discordant_read_pair&read_depth	3X
2	167494513	167501293	duplication	5kb mate-pair	discordant_read_pair&read_depth	3X
2	170104595	170111341	deletion	5kb mate-pair	discordant_read_pair&read_depth	3X
2	173179751	173186515	deletion	5kb mate-pair	discordant_read_pair&read_depth	3X
2	177265073	177272037	deletion	5kb mate-pair	discordant_read_pair&read_depth	3X
2	180065367	180081852	deletion	5kb mate-pair	discordant_read_pair&read_depth	3X
2	184084804	184091052	deletion	5kb mate-pair	discordant_read_pair&read_depth	3X
2	194689338	194698785	deletion	5kb mate-pair	discordant_read_pair&read_depth	3X
2	204181448	204191863	deletion	5kb mate-pair	discordant_read_pair&read_depth	3X
2	208350908	208359655	deletion	5kb mate-pair	discordant_read_pair&read_depth	3X
2	209942706	209949500	deletion	5kb mate-pair	discordant_read_pair&read_depth	3X
2	217089136	217094738	deletion	5kb mate-pair	discordant_read_pair&read_depth	3X
2	220052325	220056671	deletion	5kb mate-pair	discordant_read_pair&read_depth	3X
2	232685001	232715000	deletion	5kb mate-pair	discordant_read_pair&read_depth	3X
3	228695	234434	deletion	5kb mate-pair	discordant_read_pair&read_depth	3X
3	6650031	6655148	deletion	5kb mate-pair	discordant_read_pair&read_depth	3X
3	11108242	11112024	deletion	5kb mate-pair	discordant_read_pair&read_depth	3X
3	22092362	22097821	deletion	5kb mate-pair	discordant_read_pair&read_depth	3X
3	32101980	32108282	deletion	5kb mate-pair	discordant_read_pair&read_depth	3X
3	65188366	65214766	deletion	5kb mate-pair	discordant_read_pair&read_depth	3X
3	67493290	67498526	deletion	5kb mate-pair	discordant_read_pair&read_depth	3X
3	68634382	68640357	deletion	5kb mate-pair	discordant_read_pair&read_depth	3X
3	68739448	68748277	deletion	5kb mate-pair	discordant_read_pair&read_depth	3X
3	75570001	75595000	deletion	5kb mate-pair	discordant_read_pair&read_depth	3X
3	75680001	75810000	duplication	5kb mate-pair	discordant_read_pair&read_depth	3X
3	89509612	89516002	deletion	5kb mate-pair	discordant_read_pair&read_depth	3X
3	98410668	98417592	deletion	5kb mate-pair	discordant_read_pair&read_depth	3X
3	98898450	98902408	deletion	5kb mate-pair	discordant_read_pair&read_depth	3X
3	98943575	98949518	deletion	5kb mate-pair	discordant_read_pair&read_depth	3X
3	111243483	111249458	deletion	5kb mate-pair	discordant_read_pair&read_depth	3X
3	129763327	129807012	deletion	5kb mate-pair	discordant_read_pair&read_depth	3X
3	131708178	131713446	deletion	5kb mate-pair	discordant_read_pair&read_depth	3X
3	136020976	136026387	deletion	5kb mate-pair	discordant_read_pair&read_depth	3X
3	146385164	146390734	deletion	5kb mate-pair	discordant_read_pair&read_depth	3X
3	148280742	148285528	deletion	5kb mate-pair	discordant_read_pair&read_depth	3X
3	162510001	162625000	deletion	5kb mate-pair	discordant_read_pair&read_depth	3X
3	162525521	162547853	deletion	5kb mate-pair	discordant_read_pair&read_depth	3X
3	162717142	162723904	deletion	5kb mate-pair	discordant_read_pair&read_depth	3X
3	162764866	162769189	deletion	5kb mate-pair	discordant_read_pair&read_depth	3X
3	177380804	177385442	deletion	5kb mate-pair	discordant_read_pair&read_depth	3X
3	186580903	186585308	deletion	5kb mate-pair	discordant_read_pair&read_depth	3X
3	189736684	189741593	deletion	5kb mate-pair	discordant_read_pair&read_depth	3X
3	192875307	192885663	deletion	5kb mate-pair	discordant_read_pair&read_depth	3X
3	195195001	195225000	deletion	5kb mate-pair	discordant_read_pair&read_depth	3X
3	195500001	195510000	deletion	5kb mate-pair	discordant_read_pair&read_depth	3X
3	196933678	196939387	deletion	5kb mate-pair	discordant_read_pair&read_depth	3X
4	15001	70000	duplication	5kb mate-pair	discordant_read_pair&read_depth	3X
4	3613104	3620116	deletion	5kb mate-pair	discordant_read_pair&read_depth	3X
4	4125001	4150000	deletion	5kb mate-pair	discordant_read_pair&read_depth	3X
4	6897098	6901052	deletion	5kb mate-pair	discordant_read_pair&read_depth	3X
4	8799204	8818305	deletion	5kb mate-pair	discordant_read_pair&read_depth	3X
4	9160001	9215000	deletion	5kb mate-pair	discordant_read_pair&read_depth	3X
4	9325001	9370000	duplication	5kb mate-pair	discordant_read_pair&read_depth	3X
4	9455572	9481631	deletion	5kb mate-pair	discordant_read_pair&read_depth	3X
4	10210757	10234838	deletion	5kb mate-pair	discordant_read_pair&read_depth	3X
4	10392278	10402247	deletion	5kb mate-pair	discordant_read_pair&read_depth	3X
4	21160317	21167445	deletion	5kb mate-pair	discordant_read_pair&read_depth	3X
4	31820644	31837699	deletion	5kb mate-pair	discordant_read_pair&read_depth	3X
4	32834208	32842033	deletion	5kb mate-pair	discordant_read_pair&read_depth	3X
4	34779920	34829074	deletion	5kb mate-pair	discordant_read_pair&read_depth	3X
4	49512175	49518560	duplication	5kb mate-pair	discordant_read_pair&read_depth	3X
4	59943971	59951113	deletion	5kb mate-pair	discordant_read_pair&read_depth	3X
4	61329514	61333421	deletion	5kb mate-pair	discordant_read_pair&read_depth	3X
4	61937032	61942403	deletion	5kb mate-pair	discordant_read_pair&read_depth	3X
4	68264290	68266760	duplication	5kb mate-pair	discordant_read_pair&read_depth	3X
4	69375001	69490000	deletion	5kb mate-pair	discordant_read_pair&read_depth	3X
4	70125001	70230000	deletion	5kb mate-pair	discordant_read_pair&read_depth	3X
4	75285001	75325000	deletion	5kb mate-pair	discordant_read_pair&read_depth	3X
4	75642729	75648802	deletion	5kb mate-pair	discordant_read_pair&read_depth	3X
4	79268912	79275255	deletion	5kb mate-pair	discordant_read_pair&read_depth	3X
4	80887964	80894141	deletion	5kb mate-pair	discordant_read_pair&read_depth	3X
4	86975476	86980116	deletion	5kb mate-pair	discordant_read_pair&read_depth	3X
4	88268049	88274540	deletion	5kb mate-pair	discordant_read_pair&read_depth	3X
4	91596672	91602915	deletion	5kb mate-pair	discordant_read_pair&read_depth	3X
4	91931542	91935871	deletion	5kb mate-pair	discordant_read_pair&read_depth	3X
4	107603679	107609469	deletion	5kb mate-pair	discordant_read_pair&read_depth	3X
4	108127756	108131797	deletion	5kb mate-pair	discordant_read_pair&read_depth	3X
4	113497204	113501742	deletion	5kb mate-pair	discordant_read_pair&read_depth	3X
4	115928565	115932748	deletion	5kb mate-pair	discordant_read_pair&read_depth	3X
4	116166905	116177714	deletion	5kb mate-pair	discordant_read_pair&read_depth	3X
4	139468827	139473256	deletion	5kb mate-pair	discordant_read_pair&read_depth	3X
4	145315566	145319916	deletion	5kb mate-pair	discordant_read_pair&read_depth	3X
4	161043537	161075791	deletion	5kb mate-pair	discordant_read_pair&read_depth	3X
4	161878465	161884943	deletion	5kb mate-pair	discordant_read_pair&read_depth	3X
4	167676626	167683237	deletion	5kb mate-pair	discordant_read_pair&read_depth	3X
4	172988488	172992940	deletion	5kb mate-pair	discordant_read_pair&read_depth	3X
4	173425003	173433654	deletion	5kb mate-pair	discordant_read_pair&read_depth	3X
4	187092955	187098347	deletion	5kb mate-pair	discordant_read_pair&read_depth	3X
4	187353238	187358200	deletion	5kb mate-pair	discordant_read_pair&read_depth	3X
4	190057838	190064355	deletion	5kb mate-pair	discordant_read_pair&read_depth	3X
4	190470001	190685000	duplication	5kb mate-pair	discordant_read_pair&read_depth	3X
4	190604040	190610360	deletion	5kb mate-pair	discordant_read_pair&read_depth	3X
4	190795001	191045000	duplication	5kb mate-pair	discordant_read_pair&read_depth	3X
5	685001	700000	deletion	5kb mate-pair	discordant_read_pair&read_depth	3X
5	1968357	1972150	deletion	5kb mate-pair	discordant_read_pair&read_depth	3X
5	12810938	12821153	deletion	5kb mate-pair	discordant_read_pair&read_depth	3X
5	13416463	13423111	deletion	5kb mate-pair	discordant_read_pair&read_depth	3X
5	17712959	17715761	duplication	5kb mate-pair	discordant_read_pair&read_depth	3X
5	21479846	21496396	duplication	5kb mate-pair	discordant_read_pair&read_depth	3X
5	24370498	24373574	deletion	5kb mate-pair	discordant_read_pair&read_depth	3X
5	26796590	26802694	deletion	5kb mate-pair	discordant_read_pair&read_depth	3X
5	34179612	34196427	duplication	5kb mate-pair	discordant_read_pair&read_depth	3X
5	34304368	34308990	deletion	5kb mate-pair	discordant_read_pair&read_depth	3X
5	46270162	46275930	deletion	5kb mate-pair	discordant_read_pair&read_depth	3X
5	57323461	57333856	deletion	5kb mate-pair	discordant_read_pair&read_depth	3X
5	57679959	57687041	deletion	5kb mate-pair	discordant_read_pair&read_depth	3X
5	63697244	63702381	deletion	5kb mate-pair	discordant_read_pair&read_depth	3X
5	69410001	69445000	deletion	5kb mate-pair	discordant_read_pair&read_depth	3X
5	69740001	69780000	deletion	5kb mate-pair	discordant_read_pair&read_depth	3X
5	83947957	83955488	deletion	5kb mate-pair	discordant_read_pair&read_depth	3X
5	103854158	103860356	deletion	5kb mate-pair	discordant_read_pair&read_depth	3X
5	104431795	104503686	deletion	5kb mate-pair	discordant_read_pair&read_depth	3X
5	117386720	117393890	deletion	5kb mate-pair	discordant_read_pair&read_depth	3X
5	135115118	135120792	deletion	5kb mate-pair	discordant_read_pair&read_depth	3X
5	137807337	137817087	deletion	5kb mate-pair	discordant_read_pair&read_depth	3X
5	155138379	155188810	deletion	5kb mate-pair	discordant_read_pair&read_depth	3X
5	177190001	177210000	deletion	5kb mate-pair	discordant_read_pair&read_depth	3X
5	177220001	177245000	deletion	5kb mate-pair	discordant_read_pair&read_depth	3X
5	177330001	177350000	deletion	5kb mate-pair	discordant_read_pair&read_depth	3X
5	178108808	178113507	deletion	5kb mate-pair	discordant_read_pair&read_depth	3X
6	95001	380000	duplication	5kb mate-pair	discordant_read_pair&read_depth	3X
6	24811871	24818505	deletion	5kb mate-pair	discordant_read_pair&read_depth	3X
6	29843442	29850053	deletion	5kb mate-pair	discordant_read_pair&read_depth	3X
6	31421095	31425224	deletion	5kb mate-pair	discordant_read_pair&read_depth	3X
6	31950001	32000000	deletion	5kb mate-pair	discordant_read_pair&read_depth	3X
6	32455001	32635000	deletion	5kb mate-pair	discordant_read_pair&read_depth	3X
6	33937814	33943033	deletion	5kb mate-pair	discordant_read_pair&read_depth	3X
6	35755611	35766081	duplication	5kb mate-pair	discordant_read_pair&read_depth	3X
6	48930400	48938525	deletion	5kb mate-pair	discordant_read_pair&read_depth	3X
6	51739334	51745895	deletion	5kb mate-pair	discordant_read_pair&read_depth	3X
6	53928432	53934830	deletion	5kb mate-pair	discordant_read_pair&read_depth	3X
6	55825783	55847663	deletion	5kb mate-pair	discordant_read_pair&read_depth	3X
6	57205001	57610000	duplication	5kb mate-pair	discordant_read_pair&read_depth	3X
6	57284874	57289490	deletion	5kb mate-pair	discordant_read_pair&read_depth	3X
6	57296775	57301525	deletion	5kb mate-pair	discordant_read_pair&read_depth	3X
6	57423093	57429239	deletion	5kb mate-pair	discordant_read_pair&read_depth	3X
6	57582892	57590325	deletion	5kb mate-pair	discordant_read_pair&read_depth	3X
6	57622903	57628620	deletion	5kb mate-pair	discordant_read_pair&read_depth	3X
6	58423735	58429002	deletion	5kb mate-pair	discordant_read_pair&read_depth	3X
6	58773769	58780129	duplication	5kb mate-pair	discordant_read_pair&read_depth	3X
6	66398285	66404956	deletion	5kb mate-pair	discordant_read_pair&read_depth	3X
6	67008340	67049062	deletion	5kb mate-pair	discordant_read_pair&read_depth	3X
6	72862972	72873550	deletion	5kb mate-pair	discordant_read_pair&read_depth	3X
6	74613601	74620379	deletion	5kb mate-pair	discordant_read_pair&read_depth	3X
6	77097359	77103373	deletion	5kb mate-pair	discordant_read_pair&read_depth	3X
6	78967144	79037104	deletion	5kb mate-pair	discordant_read_pair&read_depth	3X
6	85318136	85325571	deletion	5kb mate-pair	discordant_read_pair&read_depth	3X
6	86708514	86714941	deletion	5kb mate-pair	discordant_read_pair&read_depth	3X
6	101934112	101939307	deletion	5kb mate-pair	discordant_read_pair&read_depth	3X
6	103737281	103762887	deletion	5kb mate-pair	discordant_read_pair&read_depth	3X
6	103939608	103944810	deletion	5kb mate-pair	discordant_read_pair&read_depth	3X
6	129319531	129326703	deletion	5kb mate-pair	discordant_read_pair&read_depth	3X
6	132114080	132119017	deletion	5kb mate-pair	discordant_read_pair&read_depth	3X
6	132374675	132379151	deletion	5kb mate-pair	discordant_read_pair&read_depth	3X
6	132706434	132713025	deletion	5kb mate-pair	discordant_read_pair&read_depth	3X
6	153029948	153033964	deletion	5kb mate-pair	discordant_read_pair&read_depth	3X
6	157699649	157703321	deletion	5kb mate-pair	discordant_read_pair&read_depth	3X
6	165724387	165733053	deletion	5kb mate-pair	discordant_read_pair&read_depth	3X
6	171005001	171045000	deletion	5kb mate-pair	discordant_read_pair&read_depth	3X
7	1	20000	deletion	5kb mate-pair	discordant_read_pair&read_depth	3X
7	1855801	1863652	deletion	5kb mate-pair	discordant_read_pair&read_depth	3X
7	13021907	13028731	deletion	5kb mate-pair	discordant_read_pair&read_depth	3X
7	26136938	26145819	deletion	5kb mate-pair	discordant_read_pair&read_depth	3X
7	31315565	31319152	deletion	5kb mate-pair	discordant_read_pair&read_depth	3X
7	32390037	32393553	deletion	5kb mate-pair	discordant_read_pair&read_depth	3X
7	39820045	39826128	deletion	5kb mate-pair	discordant_read_pair&read_depth	3X
7	49719843	49725924	deletion	5kb mate-pair	discordant_read_pair&read_depth	3X
7	51594027	51599022	deletion	5kb mate-pair	discordant_read_pair&read_depth	3X
7	56761925	56769982	deletion	5kb mate-pair	discordant_read_pair&read_depth	3X
7	57065001	57085000	deletion	5kb mate-pair	discordant_read_pair&read_depth	3X
7	57655001	57775000	duplication	5kb mate-pair	discordant_read_pair&read_depth	3X
7	61514366	61527572	deletion	5kb mate-pair	discordant_read_pair&read_depth	3X
7	61907794	61915115	deletion	5kb mate-pair	discordant_read_pair&read_depth	3X
7	61967814	61971300	duplication	5kb mate-pair	discordant_read_pair&read_depth	3X
7	61969315	61977464	deletion	5kb mate-pair	discordant_read_pair&read_depth	3X
7	64718160	64725284	deletion	5kb mate-pair	discordant_read_pair&read_depth	3X
7	64950001	65065000	duplication	5kb mate-pair	discordant_read_pair&read_depth	3X
7	72270200	72277549	deletion	5kb mate-pair	discordant_read_pair&read_depth	3X
7	91213538	91223310	deletion	5kb mate-pair	discordant_read_pair&read_depth	3X
7	93416936	93423213	deletion	5kb mate-pair	discordant_read_pair&read_depth	3X
7	96475900	96482054	deletion	5kb mate-pair	discordant_read_pair&read_depth	3X
7	96543235	96547239	deletion	5kb mate-pair	discordant_read_pair&read_depth	3X
7	97393723	97402860	deletion	5kb mate-pair	discordant_read_pair&read_depth	3X
7	100554759	100607284	deletion	5kb mate-pair	discordant_read_pair&read_depth	3X
7	101001035	101005790	deletion	5kb mate-pair	discordant_read_pair&read_depth	3X
7	101285001	101330000	deletion	5kb mate-pair	discordant_read_pair&read_depth	3X
7	102205001	102280000	duplication	5kb mate-pair	discordant_read_pair&read_depth	3X
7	110181932	110188474	deletion	5kb mate-pair	discordant_read_pair&read_depth	3X
7	113416146	113422227	deletion	5kb mate-pair	discordant_read_pair&read_depth	3X
7	126045851	126051440	deletion	5kb mate-pair	discordant_read_pair&read_depth	3X
7	127214214	127219090	deletion	5kb mate-pair	discordant_read_pair&read_depth	3X
7	141765393	141794817	deletion	5kb mate-pair	discordant_read_pair&read_depth	3X
7	142458746	142485449	duplication	5kb mate-pair	discordant_read_pair&read_depth	3X
7	143295001	143400000	deletion	5kb mate-pair	discordant_read_pair&read_depth	3X
7	143890001	143985000	duplication	5kb mate-pair	discordant_read_pair&read_depth	3X
7	148072843	148076343	deletion	5kb mate-pair	discordant_read_pair&read_depth	3X
7	149733714	149740516	deletion	5kb mate-pair	discordant_read_pair&read_depth	3X
7	156386942	156394386	deletion	5kb mate-pair	discordant_read_pair&read_depth	3X
8	1	25000	deletion	5kb mate-pair	discordant_read_pair&read_depth	3X
8	594279	599433	deletion	5kb mate-pair	discordant_read_pair&read_depth	3X
8	1340001	1355000	deletion	5kb mate-pair	discordant_read_pair&read_depth	3X
8	6991544	6995431	deletion	5kb mate-pair	discordant_read_pair&read_depth	3X
8	7045001	7110000	deletion	5kb mate-pair	discordant_read_pair&read_depth	3X
8	11895001	11975000	deletion	5kb mate-pair	discordant_read_pair&read_depth	3X
8	12085001	12250000	deletion	5kb mate-pair	discordant_read_pair&read_depth	3X
8	12355001	12460000	duplication	5kb mate-pair	discordant_read_pair&read_depth	3X
8	12427810	12434338	deletion	5kb mate-pair	discordant_read_pair&read_depth	3X
8	24972432	24991600	deletion	5kb mate-pair	discordant_read_pair&read_depth	3X
8	25066395	25071047	deletion	5kb mate-pair	discordant_read_pair&read_depth	3X
8	32679738	32691960	deletion	5kb mate-pair	discordant_read_pair&read_depth	3X
8	39230001	39385000	deletion	5kb mate-pair	discordant_read_pair&read_depth	3X
8	39884974	39891116	deletion	5kb mate-pair	discordant_read_pair&read_depth	3X
8	40774423	40779841	deletion	5kb mate-pair	discordant_read_pair&read_depth	3X
8	42190339	42194522	deletion	5kb mate-pair	discordant_read_pair&read_depth	3X
8	47525343	47544486	duplication	5kb mate-pair	discordant_read_pair&read_depth	3X
8	73787777	73793816	deletion	5kb mate-pair	discordant_read_pair&read_depth	3X
8	75362758	75367111	deletion	5kb mate-pair	discordant_read_pair&read_depth	3X
8	86725001	86840000	duplication	5kb mate-pair	discordant_read_pair&read_depth	3X
8	94071526	94077365	deletion	5kb mate-pair	discordant_read_pair&read_depth	3X
8	96874955	96880191	deletion	5kb mate-pair	discordant_read_pair&read_depth	3X
8	112292995	112297222	deletion	5kb mate-pair	discordant_read_pair&read_depth	3X
8	120154502	120161473	deletion	5kb mate-pair	discordant_read_pair&read_depth	3X
8	126595109	126601415	deletion	5kb mate-pair	discordant_read_pair&read_depth	3X
8	129465064	129471263	deletion	5kb mate-pair	discordant_read_pair&read_depth	3X
8	135082917	135089170	deletion	5kb mate-pair	discordant_read_pair&read_depth	3X
8	137160105	137163907	deletion	5kb mate-pair	discordant_read_pair&read_depth	3X
8	144700104	144714721	deletion	5kb mate-pair	discordant_read_pair&read_depth	3X
8	145190001	145215000	deletion	5kb mate-pair	discordant_read_pair&read_depth	3X
8	145290001	145500000	deletion	5kb mate-pair	discordant_read_pair&read_depth	3X
9	15814742	15822106	deletion	5kb mate-pair	discordant_read_pair&read_depth	3X
9	17908680	17912854	deletion	5kb mate-pair	discordant_read_pair&read_depth	3X
9	22496499	22504597	deletion	5kb mate-pair	discordant_read_pair&read_depth	3X
9	23362632	23377894	deletion	5kb mate-pair	discordant_read_pair&read_depth	3X
9	29092381	29098175	deletion	5kb mate-pair	discordant_read_pair&read_depth	3X
9	39090001	39185000	duplication	5kb mate-pair	discordant_read_pair&read_depth	3X
9	41085001	41220000	deletion	5kb mate-pair	discordant_read_pair&read_depth	3X
9	41740001	41800000	deletion	5kb mate-pair	discordant_read_pair&read_depth	3X
9	42140001	42240000	duplication	5kb mate-pair	discordant_read_pair&read_depth	3X
9	42460001	42545000	duplication	5kb mate-pair	discordant_read_pair&read_depth	3X
9	42870001	43165000	duplication	5kb mate-pair	discordant_read_pair&read_depth	3X
9	43925001	44060000	deletion	5kb mate-pair	discordant_read_pair&read_depth	3X
9	44235001	44285000	deletion	5kb mate-pair	discordant_read_pair&read_depth	3X
9	44475001	44730000	deletion	5kb mate-pair	discordant_read_pair&read_depth	3X
9	45350001	45485000	duplication	5kb mate-pair	discordant_read_pair&read_depth	3X
9	46695001	46915000	duplication	5kb mate-pair	discordant_read_pair&read_depth	3X
9	66050001	66245000	deletion	5kb mate-pair	discordant_read_pair&read_depth	3X
9	66350001	66455000	deletion	5kb mate-pair	discordant_read_pair&read_depth	3X
9	66455001	66585000	duplication	5kb mate-pair	discordant_read_pair&read_depth	3X
9	66462137	66478644	deletion	5kb mate-pair	discordant_read_pair&read_depth	3X
9	66670001	66865000	duplication	5kb mate-pair	discordant_read_pair&read_depth	3X
9	67235001	67345000	duplication	5kb mate-pair	discordant_read_pair&read_depth	3X
9	67795001	67900000	duplication	5kb mate-pair	discordant_read_pair&read_depth	3X
9	68325001	68505000	duplication	5kb mate-pair	discordant_read_pair&read_depth	3X
9	68990001	69280000	duplication	5kb mate-pair	discordant_read_pair&read_depth	3X
9	69330001	69575000	duplication	5kb mate-pair	discordant_read_pair&read_depth	3X
9	70840001	70930000	duplication	5kb mate-pair	discordant_read_pair&read_depth	3X
9	71738114	71743720	deletion	5kb mate-pair	discordant_read_pair&read_depth	3X
9	73320001	73350000	deletion	5kb mate-pair	discordant_read_pair&read_depth	3X
9	79770309	79777443	duplication	5kb mate-pair	discordant_read_pair&read_depth	3X
9	104714847	104724616	deletion	5kb mate-pair	discordant_read_pair&read_depth	3X
9	110537532	110540783	deletion	5kb mate-pair	discordant_read_pair&read_depth	3X
9	133029900	133034822	deletion	5kb mate-pair	discordant_read_pair&read_depth	3X
9	138213868	138218373	deletion	5kb mate-pair	discordant_read_pair&read_depth	3X
9	138925001	138945000	deletion	5kb mate-pair	discordant_read_pair&read_depth	3X
10	5287257	5293362	deletion	5kb mate-pair	discordant_read_pair&read_depth	3X
10	5889248	5892919	deletion	5kb mate-pair	discordant_read_pair&read_depth	3X
10	6411525	6417645	deletion	5kb mate-pair	discordant_read_pair&read_depth	3X
10	31246301	31252793	deletion	5kb mate-pair	discordant_read_pair&read_depth	3X
10	38870001	38985000	duplication	5kb mate-pair	discordant_read_pair&read_depth	3X
10	42383247	42396998	duplication	5kb mate-pair	discordant_read_pair&read_depth	3X
10	42393718	42400662	duplication	5kb mate-pair	discordant_read_pair&read_depth	3X
10	42596816	42600224	duplication	5kb mate-pair	discordant_read_pair&read_depth	3X
10	42605001	42685000	duplication	5kb mate-pair	discordant_read_pair&read_depth	3X
10	42701409	42716853	deletion	5kb mate-pair	discordant_read_pair&read_depth	3X
10	42745001	42820000	duplication	5kb mate-pair	discordant_read_pair&read_depth	3X
10	46940001	47150000	duplication	5kb mate-pair	discordant_read_pair&read_depth	3X
10	47705001	47960000	deletion	5kb mate-pair	discordant_read_pair&read_depth	3X
10	48015001	48295000	deletion	5kb mate-pair	discordant_read_pair&read_depth	3X
10	51135001	51355000	deletion	5kb mate-pair	discordant_read_pair&read_depth	3X
10	51635001	51720000	deletion	5kb mate-pair	discordant_read_pair&read_depth	3X
10	51835001	52000000	deletion	5kb mate-pair	discordant_read_pair&read_depth	3X
10	53203240	53214224	deletion	5kb mate-pair	discordant_read_pair&read_depth	3X
10	71280568	71291379	deletion	5kb mate-pair	discordant_read_pair&read_depth	3X
10	78255496	78261144	deletion	5kb mate-pair	discordant_read_pair&read_depth	3X
10	81475001	81505000	deletion	5kb mate-pair	discordant_read_pair&read_depth	3X
10	90794892	90801999	duplication	5kb mate-pair	discordant_read_pair&read_depth	3X
10	94134213	94137689	deletion	5kb mate-pair	discordant_read_pair&read_depth	3X
10	100686658	100702755	deletion	5kb mate-pair	discordant_read_pair&read_depth	3X
10	111572078	111578393	deletion	5kb mate-pair	discordant_read_pair&read_depth	3X
10	114112186	114116860	deletion	5kb mate-pair	discordant_read_pair&read_depth	3X
10	118765266	118769697	deletion	5kb mate-pair	discordant_read_pair&read_depth	3X
10	132908828	132913099	deletion	5kb mate-pair	discordant_read_pair&read_depth	3X
11	1915219	1936947	deletion	5kb mate-pair	discordant_read_pair&read_depth	3X
11	3270001	3355000	deletion	5kb mate-pair	discordant_read_pair&read_depth	3X
11	4250001	4340000	deletion	5kb mate-pair	discordant_read_pair&read_depth	3X
11	4966544	4977902	deletion	5kb mate-pair	discordant_read_pair&read_depth	3X
11	24349445	24355632	deletion	5kb mate-pair	discordant_read_pair&read_depth	3X
11	29006751	29013060	deletion	5kb mate-pair	discordant_read_pair&read_depth	3X
11	31392979	31397659	deletion	5kb mate-pair	discordant_read_pair&read_depth	3X
11	47057560	47063769	deletion	5kb mate-pair	discordant_read_pair&read_depth	3X
11	48600853	48604403	deletion	5kb mate-pair	discordant_read_pair&read_depth	3X
11	51340984	51363119	deletion	5kb mate-pair	discordant_read_pair&read_depth	3X
11	51572206	51574353	duplication	5kb mate-pair	discordant_read_pair&read_depth	3X
11	51579562	51592052	duplication	5kb mate-pair	discordant_read_pair&read_depth	3X
11	55365001	55460000	deletion	5kb mate-pair	discordant_read_pair&read_depth	3X
11	60975001	61015000	deletion	5kb mate-pair	discordant_read_pair&read_depth	3X
11	69089779	69139920	deletion	5kb mate-pair	discordant_read_pair&read_depth	3X
11	81854594	81863371	deletion	5kb mate-pair	discordant_read_pair&read_depth	3X
11	92869786	92875952	deletion	5kb mate-pair	discordant_read_pair&read_depth	3X
11	93153135	93160240	deletion	5kb mate-pair	discordant_read_pair&read_depth	3X
11	93969651	93972273	duplication	5kb mate-pair	discordant_read_pair&read_depth	3X
11	95169282	95175434	deletion	5kb mate-pair	discordant_read_pair&read_depth	3X
11	101565883	101575309	deletion	5kb mate-pair	discordant_read_pair&read_depth	3X
11	104267738	104273454	deletion	5kb mate-pair	discordant_read_pair&read_depth	3X
11	124774058	124778695	deletion	5kb mate-pair	discordant_read_pair&read_depth	3X
11	134601719	134607748	deletion	5kb mate-pair	discordant_read_pair&read_depth	3X
12	292117	298060	deletion	5kb mate-pair	discordant_read_pair&read_depth	3X
12	377061	384976	deletion	5kb mate-pair	discordant_read_pair&read_depth	3X
12	1193468	1200524	deletion	5kb mate-pair	discordant_read_pair&read_depth	3X
12	7189632	7239949	deletion	5kb mate-pair	discordant_read_pair&read_depth	3X
12	8556529	8591529	deletion	5kb mate-pair	discordant_read_pair&read_depth	3X
12	9630001	9735000	deletion	5kb mate-pair	discordant_read_pair&read_depth	3X
12	11225001	11250000	deletion	5kb mate-pair	discordant_read_pair&read_depth	3X
12	11502480	11546959	deletion	5kb mate-pair	discordant_read_pair&read_depth	3X
12	22570001	22585000	deletion	5kb mate-pair	discordant_read_pair&read_depth	3X
12	34844252	34849330	deletion	5kb mate-pair	discordant_read_pair&read_depth	3X
12	37990768	37994764	deletion	5kb mate-pair	discordant_read_pair&read_depth	3X
12	38010054	38018434	deletion	5kb mate-pair	discordant_read_pair&read_depth	3X
12	45902923	45910354	deletion	5kb mate-pair	discordant_read_pair&read_depth	3X
12	80154968	80162679	duplication	5kb mate-pair	discordant_read_pair&read_depth	3X
12	84592806	84596076	deletion	5kb mate-pair	discordant_read_pair&read_depth	3X
12	90486290	90492226	deletion	5kb mate-pair	discordant_read_pair&read_depth	3X
12	98955391	98959057	deletion	5kb mate-pair	discordant_read_pair&read_depth	3X
12	99793749	99802785	deletion	5kb mate-pair	discordant_read_pair&read_depth	3X
12	100287892	100291975	deletion	5kb mate-pair	discordant_read_pair&read_depth	3X
12	102102373	102108019	deletion	5kb mate-pair	discordant_read_pair&read_depth	3X
12	122530515	122581659	deletion	5kb mate-pair	discordant_read_pair&read_depth	3X
12	132635001	132645000	deletion	5kb mate-pair	discordant_read_pair&read_depth	3X
13	23632372	23637834	deletion	5kb mate-pair	discordant_read_pair&read_depth	3X
13	30215703	30221958	deletion	5kb mate-pair	discordant_read_pair&read_depth	3X
13	39057214	39060787	deletion	5kb mate-pair	discordant_read_pair&read_depth	3X
13	51069294	51075227	deletion	5kb mate-pair	discordant_read_pair&read_depth	3X
13	72477266	72480771	deletion	5kb mate-pair	discordant_read_pair&read_depth	3X
13	72807390	72812468	deletion	5kb mate-pair	discordant_read_pair&read_depth	3X
13	72842580	72847326	deletion	5kb mate-pair	discordant_read_pair&read_depth	3X
13	83165903	83172454	deletion	5kb mate-pair	discordant_read_pair&read_depth	3X
13	99253578	99258821	deletion	5kb mate-pair	discordant_read_pair&read_depth	3X
13	112935001	112965000	deletion	5kb mate-pair	discordant_read_pair&read_depth	3X
14	19000001	19125000	duplication	5kb mate-pair	discordant_read_pair&read_depth	3X
14	19200001	19325000	deletion	5kb mate-pair	discordant_read_pair&read_depth	3X
14	20549532	20556700	deletion	5kb mate-pair	discordant_read_pair&read_depth	3X
14	23105027	23110131	deletion	5kb mate-pair	discordant_read_pair&read_depth	3X
14	40609807	40617744	deletion	5kb mate-pair	discordant_read_pair&read_depth	3X
14	65360021	65363543	deletion	5kb mate-pair	discordant_read_pair&read_depth	3X
14	73996152	74025745	deletion	5kb mate-pair	discordant_read_pair&read_depth	3X
14	74239702	74246949	deletion	5kb mate-pair	discordant_read_pair&read_depth	3X
14	80105938	80115877	deletion	5kb mate-pair	discordant_read_pair&read_depth	3X
14	82499083	82503618	deletion	5kb mate-pair	discordant_read_pair&read_depth	3X
14	105576501	105580999	deletion	5kb mate-pair	discordant_read_pair&read_depth	3X
14	106330832	106369750	deletion	5kb mate-pair	discordant_read_pair&read_depth	3X
15	20000001	20150000	duplication	5kb mate-pair	discordant_read_pair&read_depth	3X
15	20280001	20320000	deletion	5kb mate-pair	discordant_read_pair&read_depth	3X
15	20405001	20630000	duplication	5kb mate-pair	discordant_read_pair&read_depth	3X
15	20581397	20589783	deletion	5kb mate-pair	discordant_read_pair&read_depth	3X
15	23670954	23675495	deletion	5kb mate-pair	discordant_read_pair&read_depth	3X
15	55218224	55224881	deletion	5kb mate-pair	discordant_read_pair&read_depth	3X
15	68425630	68428967	deletion	5kb mate-pair	discordant_read_pair&read_depth	3X
15	71708595	71713734	deletion	5kb mate-pair	discordant_read_pair&read_depth	3X
15	76884489	76897291	deletion	5kb mate-pair	discordant_read_pair&read_depth	3X
15	82965001	82990000	deletion	5kb mate-pair	discordant_read_pair&read_depth	3X
15	83025001	83215000	deletion	5kb mate-pair	discordant_read_pair&read_depth	3X
15	83551572	83557740	deletion	5kb mate-pair	discordant_read_pair&read_depth	3X
15	84834214	84916926	deletion	5kb mate-pair	discordant_read_pair&read_depth	3X
15	101094532	101098787	deletion	5kb mate-pair	discordant_read_pair&read_depth	3X
16	15035001	15125000	duplication	5kb mate-pair	discordant_read_pair&read_depth	3X
16	16934097	16940406	deletion	5kb mate-pair	discordant_read_pair&read_depth	3X
16	18832352	18838473	deletion	5kb mate-pair	discordant_read_pair&read_depth	3X
16	19945479	19967727	deletion	5kb mate-pair	discordant_read_pair&read_depth	3X
16	21515001	21595000	duplication	5kb mate-pair	discordant_read_pair&read_depth	3X
16	21750001	21810000	duplication	5kb mate-pair	discordant_read_pair&read_depth	3X
16	22540001	22710000	duplication	5kb mate-pair	discordant_read_pair&read_depth	3X
16	33373662	33379406	deletion	5kb mate-pair	discordant_read_pair&read_depth	3X
16	33978766	33982698	deletion	5kb mate-pair	discordant_read_pair&read_depth	3X
16	34465001	34760000	duplication	5kb mate-pair	discordant_read_pair&read_depth	3X
16	46386542	46395488	duplication	5kb mate-pair	discordant_read_pair&read_depth	3X
16	46388319	46408720	duplication	5kb mate-pair	discordant_read_pair&read_depth	3X
16	46393410	46402989	deletion	5kb mate-pair	discordant_read_pair&read_depth	3X
16	46394082	46411969	deletion	5kb mate-pair	discordant_read_pair&read_depth	3X
16	46398645	46408731	duplication	5kb mate-pair	discordant_read_pair&read_depth	3X
16	46414409	46420973	duplication	5kb mate-pair	discordant_read_pair&read_depth	3X
16	46416810	46432899	duplication	5kb mate-pair	discordant_read_pair&read_depth	3X
16	62544203	62551034	deletion	5kb mate-pair	discordant_read_pair&read_depth	3X
16	76539040	76544031	deletion	5kb mate-pair	discordant_read_pair&read_depth	3X
17	193639	199952	deletion	5kb mate-pair	discordant_read_pair&read_depth	3X
17	12353145	12359546	deletion	5kb mate-pair	discordant_read_pair&read_depth	3X
17	16660001	16730000	duplication	5kb mate-pair	discordant_read_pair&read_depth	3X
17	18355001	18385000	deletion	5kb mate-pair	discordant_read_pair&read_depth	3X
17	18415001	18465000	deletion	5kb mate-pair	discordant_read_pair&read_depth	3X
17	18730001	18745000	deletion	5kb mate-pair	discordant_read_pair&read_depth	3X
17	21195001	21255000	duplication	5kb mate-pair	discordant_read_pair&read_depth	3X
17	21212571	21221393	deletion	5kb mate-pair	discordant_read_pair&read_depth	3X
17	21305001	21355000	duplication	5kb mate-pair	discordant_read_pair&read_depth	3X
17	25536080	25540526	deletion	5kb mate-pair	discordant_read_pair&read_depth	3X
17	34505001	34725000	deletion	5kb mate-pair	discordant_read_pair&read_depth	3X
17	35754956	35759549	deletion	5kb mate-pair	discordant_read_pair&read_depth	3X
17	36285001	36405000	duplication	5kb mate-pair	discordant_read_pair&read_depth	3X
17	39421710	39432343	deletion	5kb mate-pair	discordant_read_pair&read_depth	3X
17	41399674	41401206	duplication	5kb mate-pair	discordant_read_pair&read_depth	3X
17	41439344	41442268	duplication	5kb mate-pair	discordant_read_pair&read_depth	3X
17	44650001	44790000	deletion	5kb mate-pair	discordant_read_pair&read_depth	3X
17	51852779	51861195	deletion	5kb mate-pair	discordant_read_pair&read_depth	3X
17	77495001	77525000	deletion	5kb mate-pair	discordant_read_pair&read_depth	3X
18	107872	111475	duplication	5kb mate-pair	discordant_read_pair&read_depth	3X
18	15404725	15410218	duplication	5kb mate-pair	discordant_read_pair&read_depth	3X
18	18511370	18517508	duplication	5kb mate-pair	discordant_read_pair&read_depth	3X
18	30495100	30501296	deletion	5kb mate-pair	discordant_read_pair&read_depth	3X
18	38259582	38267122	deletion	5kb mate-pair	discordant_read_pair&read_depth	3X
18	38864768	38868386	deletion	5kb mate-pair	discordant_read_pair&read_depth	3X
18	47694898	47698505	deletion	5kb mate-pair	discordant_read_pair&read_depth	3X
18	51952848	51957055	deletion	5kb mate-pair	discordant_read_pair&read_depth	3X
18	63723640	63732480	deletion	5kb mate-pair	discordant_read_pair&read_depth	3X
18	75721493	75772216	deletion	5kb mate-pair	discordant_read_pair&read_depth	3X
18	76662088	76667866	deletion	5kb mate-pair	discordant_read_pair&read_depth	3X
19	135001	220000	duplication	5kb mate-pair	discordant_read_pair&read_depth	3X
19	1245001	1265000	deletion	5kb mate-pair	discordant_read_pair&read_depth	3X
19	8340001	8365000	deletion	5kb mate-pair	discordant_read_pair&read_depth	3X
19	12694570	12699008	deletion	5kb mate-pair	discordant_read_pair&read_depth	3X
19	15046384	15053029	deletion	5kb mate-pair	discordant_read_pair&read_depth	3X
19	20505001	20715000	deletion	5kb mate-pair	discordant_read_pair&read_depth	3X
19	21050001	21105000	deletion	5kb mate-pair	discordant_read_pair&read_depth	3X
19	27731946	27736806	duplication	5kb mate-pair	discordant_read_pair&read_depth	3X
19	27831410	27838298	deletion	5kb mate-pair	discordant_read_pair&read_depth	3X
19	29950077	29957312	deletion	5kb mate-pair	discordant_read_pair&read_depth	3X
19	30388494	30393109	deletion	5kb mate-pair	discordant_read_pair&read_depth	3X
19	35659857	35665871	deletion	5kb mate-pair	discordant_read_pair&read_depth	3X
19	36840315	36847332	deletion	5kb mate-pair	discordant_read_pair&read_depth	3X
19	46622711	46628376	deletion	5kb mate-pair	discordant_read_pair&read_depth	3X
19	51077892	51082651	deletion	5kb mate-pair	discordant_read_pair&read_depth	3X
19	52132360	52151365	deletion	5kb mate-pair	discordant_read_pair&read_depth	3X
20	1560379	1596097	deletion	5kb mate-pair	discordant_read_pair&read_depth	3X
20	2802118	2807278	deletion	5kb mate-pair	discordant_read_pair&read_depth	3X
20	25770001	25825000	deletion	5kb mate-pair	discordant_read_pair&read_depth	3X
20	25870001	25930000	duplication	5kb mate-pair	discordant_read_pair&read_depth	3X
20	26050001	26150000	duplication	5kb mate-pair	discordant_read_pair&read_depth	3X
20	26297257	26303043	deletion	5kb mate-pair	discordant_read_pair&read_depth	3X
20	29420001	29490000	duplication	5kb mate-pair	discordant_read_pair&read_depth	3X
20	29565001	29655000	duplication	5kb mate-pair	discordant_read_pair&read_depth	3X
20	29584186	29593183	deletion	5kb mate-pair	discordant_read_pair&read_depth	3X
20	31525402	31529632	deletion	5kb mate-pair	discordant_read_pair&read_depth	3X
20	32814423	32819768	deletion	5kb mate-pair	discordant_read_pair&read_depth	3X
20	52646982	52658389	deletion	5kb mate-pair	discordant_read_pair&read_depth	3X
20	54434275	54442859	deletion	5kb mate-pair	discordant_read_pair&read_depth	3X
20	62720001	62730000	deletion	5kb mate-pair	discordant_read_pair&read_depth	3X
21	9410001	9595000	duplication	5kb mate-pair	discordant_read_pair&read_depth	3X
21	9825001	10035000	duplication	5kb mate-pair	discordant_read_pair&read_depth	3X
21	10085001	10215000	duplication	5kb mate-pair	discordant_read_pair&read_depth	3X
21	10365001	10645000	duplication	5kb mate-pair	discordant_read_pair&read_depth	3X
21	10718911	10722700	duplication	5kb mate-pair	discordant_read_pair&read_depth	3X
21	10744001	10752336	deletion	5kb mate-pair	discordant_read_pair&read_depth	3X
21	10756263	10760527	deletion	5kb mate-pair	discordant_read_pair&read_depth	3X
21	11081210	11117398	deletion	5kb mate-pair	discordant_read_pair&read_depth	3X
21	11096665	11108478	deletion	5kb mate-pair	discordant_read_pair&read_depth	3X
21	14340001	14450000	duplication	5kb mate-pair	discordant_read_pair&read_depth	3X
21	42955536	43005746	deletion	5kb mate-pair	discordant_read_pair&read_depth	3X
21	43349876	43354726	deletion	5kb mate-pair	discordant_read_pair&read_depth	3X
22	16505001	16640000	deletion	5kb mate-pair	discordant_read_pair&read_depth	3X
22	16850001	16960000	duplication	5kb mate-pair	discordant_read_pair&read_depth	3X
22	17770008	17779242	deletion	5kb mate-pair	discordant_read_pair&read_depth	3X
22	18705001	18715000	deletion	5kb mate-pair	discordant_read_pair&read_depth	3X
22	18765001	18825000	duplication	5kb mate-pair	discordant_read_pair&read_depth	3X
22	20365001	20610000	deletion	5kb mate-pair	discordant_read_pair&read_depth	3X
22	20949865	20954095	deletion	5kb mate-pair	discordant_read_pair&read_depth	3X
22	21565001	21660000	duplication	5kb mate-pair	discordant_read_pair&read_depth	3X
22	21725001	21740000	deletion	5kb mate-pair	discordant_read_pair&read_depth	3X
22	21815001	21850000	deletion	5kb mate-pair	discordant_read_pair&read_depth	3X
22	22385001	22610000	deletion	5kb mate-pair	discordant_read_pair&read_depth	3X
22	22670001	23255000	deletion	5kb mate-pair	discordant_read_pair&read_depth	3X
22	24052710	24061826	duplication	5kb mate-pair	discordant_read_pair&read_depth	3X
22	24271879	24311362	deletion	5kb mate-pair	discordant_read_pair&read_depth	3X
22	31775869	31780652	deletion	5kb mate-pair	discordant_read_pair&read_depth	3X
22	37143063	37147873	deletion	5kb mate-pair	discordant_read_pair&read_depth	3X
X	1030001	1210000	deletion	5kb mate-pair	discordant_read_pair&read_depth	3X
X	1485001	1495000	deletion	5kb mate-pair	discordant_read_pair&read_depth	3X
X	1755645	1760804	deletion	5kb mate-pair	discordant_read_pair&read_depth	3X
X	2194653	2200733	deletion	5kb mate-pair	discordant_read_pair&read_depth	3X
X	7623786	7673968	deletion	5kb mate-pair	discordant_read_pair&read_depth	3X
X	10738591	10788695	deletion	5kb mate-pair	discordant_read_pair&read_depth	3X
X	11725333	11731447	deletion	5kb mate-pair	discordant_read_pair&read_depth	3X
X	34436900	34442885	deletion	5kb mate-pair	discordant_read_pair&read_depth	3X
X	39955001	39970000	deletion	5kb mate-pair	discordant_read_pair&read_depth	3X
X	67123599	67130444	deletion	5kb mate-pair	discordant_read_pair&read_depth	3X
X	78921770	78926095	deletion	5kb mate-pair	discordant_read_pair&read_depth	3X
X	81096591	81102987	deletion	5kb mate-pair	discordant_read_pair&read_depth	3X
X	81982314	81988139	deletion	5kb mate-pair	discordant_read_pair&read_depth	3X
X	85604774	85609942	deletion	5kb mate-pair	discordant_read_pair&read_depth	3X
X	95312154	95319119	deletion	5kb mate-pair	discordant_read_pair&read_depth	3X
X	101055427	101067336	duplication	5kb mate-pair	discordant_read_pair&read_depth	3X
X	103147651	103155547	deletion	5kb mate-pair	discordant_read_pair&read_depth	3X
X	120010001	120120000	deletion	5kb mate-pair	discordant_read_pair&read_depth	3X
X	126597669	126603005	deletion	5kb mate-pair	discordant_read_pair&read_depth	3X
X	143405119	143411384	deletion	5kb mate-pair	discordant_read_pair&read_depth	3X
X	148906019	148956440	deletion	5kb mate-pair	discordant_read_pair&read_depth	3X
X	152230001	152350000	deletion	5kb mate-pair	discordant_read_pair&read_depth	3X
X	154790092	154803579	deletion	5kb mate-pair	discordant_read_pair&read_depth	3X

## Sheet: 5X 5kb mate-pair
Chr	Start	End	Type	Library	Detection	Coverage
1	75001	95000	deletion	5kb mate-pair	discordant_read_pair&read_depth	5X
1	175001	320000	deletion	5kb mate-pair	discordant_read_pair&read_depth	5X
1	1585525	1650599	duplication	5kb mate-pair	discordant_read_pair&read_depth	5X
1	13010001	13170000	deletion	5kb mate-pair	discordant_read_pair&read_depth	5X
1	13220001	13440000	deletion	5kb mate-pair	discordant_read_pair&read_depth	5X
1	13480001	13665000	deletion	5kb mate-pair	discordant_read_pair&read_depth	5X
1	16151872	16155714	deletion	5kb mate-pair	discordant_read_pair&read_depth	5X
1	16830001	17000000	duplication	5kb mate-pair	discordant_read_pair&read_depth	5X
1	16842825	16856959	deletion	5kb mate-pair	discordant_read_pair&read_depth	5X
1	16890814	16893934	duplication	5kb mate-pair	discordant_read_pair&read_depth	5X
1	16907054	16914923	duplication	5kb mate-pair	discordant_read_pair&read_depth	5X
1	17009547	17016409	deletion	5kb mate-pair	discordant_read_pair&read_depth	5X
1	17015001	17125000	duplication	5kb mate-pair	discordant_read_pair&read_depth	5X
1	22315615	22343448	deletion	5kb mate-pair	discordant_read_pair&read_depth	5X
1	25158677	25161524	deletion	5kb mate-pair	discordant_read_pair&read_depth	5X
1	25590001	25665000	deletion	5kb mate-pair	discordant_read_pair&read_depth	5X
1	35101320	35112080	deletion	5kb mate-pair	discordant_read_pair&read_depth	5X
1	39998048	40001591	deletion	5kb mate-pair	discordant_read_pair&read_depth	5X
1	56829852	56835026	deletion	5kb mate-pair	discordant_read_pair&read_depth	5X
1	63705328	63708150	deletion	5kb mate-pair	discordant_read_pair&read_depth	5X
1	66024153	66030487	deletion	5kb mate-pair	discordant_read_pair&read_depth	5X
1	72766320	72811907	deletion	5kb mate-pair	discordant_read_pair&read_depth	5X
1	75842745	75851174	deletion	5kb mate-pair	discordant_read_pair&read_depth	5X
1	78648683	78654310	deletion	5kb mate-pair	discordant_read_pair&read_depth	5X
1	81403546	81411047	deletion	5kb mate-pair	discordant_read_pair&read_depth	5X
1	84517902	84524696	deletion	5kb mate-pair	discordant_read_pair&read_depth	5X
1	89475796	89478644	deletion	5kb mate-pair	discordant_read_pair&read_depth	5X
1	94288305	94291595	deletion	5kb mate-pair	discordant_read_pair&read_depth	5X
1	103785001	104000000	deletion	5kb mate-pair	discordant_read_pair&read_depth	5X
1	108402975	108406363	deletion	5kb mate-pair	discordant_read_pair&read_depth	5X
1	108732943	108737329	deletion	5kb mate-pair	discordant_read_pair&read_depth	5X
1	110186889	110191480	deletion	5kb mate-pair	discordant_read_pair&read_depth	5X
1	110225001	110245000	deletion	5kb mate-pair	discordant_read_pair&read_depth	5X
1	112835012	112837800	deletion	5kb mate-pair	discordant_read_pair&read_depth	5X
1	114039745	114046016	deletion	5kb mate-pair	discordant_read_pair&read_depth	5X
1	116229130	116232950	deletion	5kb mate-pair	discordant_read_pair&read_depth	5X
1	121478384	121485439	duplication	5kb mate-pair	discordant_read_pair&read_depth	5X
1	142535001	142730000	duplication	5kb mate-pair	discordant_read_pair&read_depth	5X
1	142780001	142970000	duplication	5kb mate-pair	discordant_read_pair&read_depth	5X
1	142789177	142808235	deletion	5kb mate-pair	discordant_read_pair&read_depth	5X
1	142803249	142833158	deletion	5kb mate-pair	discordant_read_pair&read_depth	5X
1	143120001	143285000	duplication	5kb mate-pair	discordant_read_pair&read_depth	5X
1	143282544	143283922	duplication	5kb mate-pair	discordant_read_pair&read_depth	5X
1	143345001	143545000	duplication	5kb mate-pair	discordant_read_pair&read_depth	5X
1	144345001	144500000	deletion	5kb mate-pair	discordant_read_pair&read_depth	5X
1	144895631	144906862	deletion	5kb mate-pair	discordant_read_pair&read_depth	5X
1	145092941	145097203	deletion	5kb mate-pair	discordant_read_pair&read_depth	5X
1	145268530	145274722	deletion	5kb mate-pair	discordant_read_pair&read_depth	5X
1	145294733	145302998	deletion	5kb mate-pair	discordant_read_pair&read_depth	5X
1	146050001	146310000	deletion	5kb mate-pair	discordant_read_pair&read_depth	5X
1	152555234	152589003	deletion	5kb mate-pair	discordant_read_pair&read_depth	5X
1	152760113	152771126	deletion	5kb mate-pair	discordant_read_pair&read_depth	5X
1	158867466	158870672	deletion	5kb mate-pair	discordant_read_pair&read_depth	5X
1	158961212	158966304	deletion	5kb mate-pair	discordant_read_pair&read_depth	5X
1	159014013	159019770	deletion	5kb mate-pair	discordant_read_pair&read_depth	5X
1	180749694	180755411	deletion	5kb mate-pair	discordant_read_pair&read_depth	5X
1	184814591	184820987	deletion	5kb mate-pair	discordant_read_pair&read_depth	5X
1	187715861	187722525	deletion	5kb mate-pair	discordant_read_pair&read_depth	5X
1	189704313	189783458	deletion	5kb mate-pair	discordant_read_pair&read_depth	5X
1	194451029	194454364	deletion	5kb mate-pair	discordant_read_pair&read_depth	5X
1	197500470	197503313	deletion	5kb mate-pair	discordant_read_pair&read_depth	5X
1	206282728	206288347	duplication	5kb mate-pair	discordant_read_pair&read_depth	5X
1	207541766	207545624	deletion	5kb mate-pair	discordant_read_pair&read_depth	5X
1	207700001	207745000	deletion	5kb mate-pair	discordant_read_pair&read_depth	5X
1	218182425	218188986	deletion	5kb mate-pair	discordant_read_pair&read_depth	5X
1	222374018	222380607	deletion	5kb mate-pair	discordant_read_pair&read_depth	5X
1	229812540	229821067	deletion	5kb mate-pair	discordant_read_pair&read_depth	5X
1	247850358	247856509	deletion	5kb mate-pair	discordant_read_pair&read_depth	5X
1	248051481	248057743	deletion	5kb mate-pair	discordant_read_pair&read_depth	5X
1	248600001	248670000	duplication	5kb mate-pair	discordant_read_pair&read_depth	5X
1	248670001	248820000	deletion	5kb mate-pair	discordant_read_pair&read_depth	5X
2	1525001	1540000	deletion	5kb mate-pair	discordant_read_pair&read_depth	5X
2	3732734	3738894	deletion	5kb mate-pair	discordant_read_pair&read_depth	5X
2	4212499	4223594	deletion	5kb mate-pair	discordant_read_pair&read_depth	5X
2	4781280	4787388	deletion	5kb mate-pair	discordant_read_pair&read_depth	5X
2	14704105	14710790	deletion	5kb mate-pair	discordant_read_pair&read_depth	5X
2	16271056	16274598	deletion	5kb mate-pair	discordant_read_pair&read_depth	5X
2	19185001	19225000	deletion	5kb mate-pair	discordant_read_pair&read_depth	5X
2	21152776	21178268	deletion	5kb mate-pair	discordant_read_pair&read_depth	5X
2	33224266	33227311	deletion	5kb mate-pair	discordant_read_pair&read_depth	5X
2	34695651	34736702	deletion	5kb mate-pair	discordant_read_pair&read_depth	5X
2	34797529	34802232	deletion	5kb mate-pair	discordant_read_pair&read_depth	5X
2	35975977	35997164	deletion	5kb mate-pair	discordant_read_pair&read_depth	5X
2	36216274	36221169	deletion	5kb mate-pair	discordant_read_pair&read_depth	5X
2	41972808	41977046	deletion	5kb mate-pair	discordant_read_pair&read_depth	5X
2	48781723	48785202	deletion	5kb mate-pair	discordant_read_pair&read_depth	5X
2	52749631	52785295	deletion	5kb mate-pair	discordant_read_pair&read_depth	5X
2	59623222	59631228	deletion	5kb mate-pair	discordant_read_pair&read_depth	5X
2	76526384	76528926	deletion	5kb mate-pair	discordant_read_pair&read_depth	5X
2	79076480	79081251	deletion	5kb mate-pair	discordant_read_pair&read_depth	5X
2	87630001	87740000	deletion	5kb mate-pair	discordant_read_pair&read_depth	5X
2	89029244	89032434	deletion	5kb mate-pair	discordant_read_pair&read_depth	5X
2	89853721	89856640	deletion	5kb mate-pair	discordant_read_pair&read_depth	5X
2	90370001	90515000	duplication	5kb mate-pair	discordant_read_pair&read_depth	5X
2	90477409	90481085	duplication	5kb mate-pair	discordant_read_pair&read_depth	5X
2	91715001	91955000	duplication	5kb mate-pair	discordant_read_pair&read_depth	5X
2	91750630	91759762	deletion	5kb mate-pair	discordant_read_pair&read_depth	5X
2	91970001	92105000	duplication	5kb mate-pair	discordant_read_pair&read_depth	5X
2	92287210	92296355	deletion	5kb mate-pair	discordant_read_pair&read_depth	5X
2	92291015	92300336	duplication	5kb mate-pair	discordant_read_pair&read_depth	5X
2	92297778	92303156	deletion	5kb mate-pair	discordant_read_pair&read_depth	5X
2	92307196	92325269	duplication	5kb mate-pair	discordant_read_pair&read_depth	5X
2	97869288	97874278	deletion	5kb mate-pair	discordant_read_pair&read_depth	5X
2	98135001	98165000	deletion	5kb mate-pair	discordant_read_pair&read_depth	5X
2	105824570	105829227	deletion	5kb mate-pair	discordant_read_pair&read_depth	5X
2	109689960	109695262	deletion	5kb mate-pair	discordant_read_pair&read_depth	5X
2	110685001	110735000	deletion	5kb mate-pair	discordant_read_pair&read_depth	5X
2	110985001	111025000	deletion	5kb mate-pair	discordant_read_pair&read_depth	5X
2	111150001	111200000	deletion	5kb mate-pair	discordant_read_pair&read_depth	5X
2	123476572	123482616	deletion	5kb mate-pair	discordant_read_pair&read_depth	5X
2	126443250	126451884	deletion	5kb mate-pair	discordant_read_pair&read_depth	5X
2	127674762	127677347	deletion	5kb mate-pair	discordant_read_pair&read_depth	5X
2	129638369	129646272	deletion	5kb mate-pair	discordant_read_pair&read_depth	5X
2	130242150	130251501	deletion	5kb mate-pair	discordant_read_pair&read_depth	5X
2	130954912	130957436	deletion	5kb mate-pair	discordant_read_pair&read_depth	5X
2	131335001	131415000	duplication	5kb mate-pair	discordant_read_pair&read_depth	5X
2	131614485	131622010	deletion	5kb mate-pair	discordant_read_pair&read_depth	5X
2	133671649	133675177	deletion	5kb mate-pair	discordant_read_pair&read_depth	5X
2	134966721	134970257	deletion	5kb mate-pair	discordant_read_pair&read_depth	5X
2	146862516	146876964	deletion	5kb mate-pair	discordant_read_pair&read_depth	5X
2	151031098	151038308	deletion	5kb mate-pair	discordant_read_pair&read_depth	5X
2	155818936	155830446	deletion	5kb mate-pair	discordant_read_pair&read_depth	5X
2	159957835	159962251	deletion	5kb mate-pair	discordant_read_pair&read_depth	5X
2	160149062	160151967	deletion	5kb mate-pair	discordant_read_pair&read_depth	5X
2	162135109	162138562	duplication	5kb mate-pair	discordant_read_pair&read_depth	5X
2	167494513	167501293	duplication	5kb mate-pair	discordant_read_pair&read_depth	5X
2	170104595	170111341	deletion	5kb mate-pair	discordant_read_pair&read_depth	5X
2	170641410	170643997	deletion	5kb mate-pair	discordant_read_pair&read_depth	5X
2	173179751	173186216	deletion	5kb mate-pair	discordant_read_pair&read_depth	5X
2	177265601	177272037	deletion	5kb mate-pair	discordant_read_pair&read_depth	5X
2	180065367	180081852	deletion	5kb mate-pair	discordant_read_pair&read_depth	5X
2	184085036	184091052	deletion	5kb mate-pair	discordant_read_pair&read_depth	5X
2	194689382	194698785	deletion	5kb mate-pair	discordant_read_pair&read_depth	5X
2	204181524	204191863	deletion	5kb mate-pair	discordant_read_pair&read_depth	5X
2	208350908	208359491	deletion	5kb mate-pair	discordant_read_pair&read_depth	5X
2	209942706	209949233	deletion	5kb mate-pair	discordant_read_pair&read_depth	5X
2	217089847	217092643	deletion	5kb mate-pair	discordant_read_pair&read_depth	5X
2	220052325	220056429	deletion	5kb mate-pair	discordant_read_pair&read_depth	5X
2	223760179	223762699	deletion	5kb mate-pair	discordant_read_pair&read_depth	5X
2	232685001	232715000	deletion	5kb mate-pair	discordant_read_pair&read_depth	5X
2	235554056	235558386	deletion	5kb mate-pair	discordant_read_pair&read_depth	5X
3	228695	234434	deletion	5kb mate-pair	discordant_read_pair&read_depth	5X
3	4066827	4069549	deletion	5kb mate-pair	discordant_read_pair&read_depth	5X
3	6650031	6654833	deletion	5kb mate-pair	discordant_read_pair&read_depth	5X
3	11108242	11112008	deletion	5kb mate-pair	discordant_read_pair&read_depth	5X
3	22092362	22097821	deletion	5kb mate-pair	discordant_read_pair&read_depth	5X
3	32101980	32108282	deletion	5kb mate-pair	discordant_read_pair&read_depth	5X
3	42837918	42840850	deletion	5kb mate-pair	discordant_read_pair&read_depth	5X
3	47490638	47493439	deletion	5kb mate-pair	discordant_read_pair&read_depth	5X
3	65188366	65214766	deletion	5kb mate-pair	discordant_read_pair&read_depth	5X
3	67493697	67497196	deletion	5kb mate-pair	discordant_read_pair&read_depth	5X
3	68634572	68640357	deletion	5kb mate-pair	discordant_read_pair&read_depth	5X
3	68739448	68747932	deletion	5kb mate-pair	discordant_read_pair&read_depth	5X
3	75570001	75595000	deletion	5kb mate-pair	discordant_read_pair&read_depth	5X
3	75680001	75795000	duplication	5kb mate-pair	discordant_read_pair&read_depth	5X
3	83852064	83856044	deletion	5kb mate-pair	discordant_read_pair&read_depth	5X
3	89509612	89516002	deletion	5kb mate-pair	discordant_read_pair&read_depth	5X
3	98410668	98417592	deletion	5kb mate-pair	discordant_read_pair&read_depth	5X
3	98898581	98902408	deletion	5kb mate-pair	discordant_read_pair&read_depth	5X
3	98943575	98949518	deletion	5kb mate-pair	discordant_read_pair&read_depth	5X
3	111243483	111249017	deletion	5kb mate-pair	discordant_read_pair&read_depth	5X
3	129763327	129806801	deletion	5kb mate-pair	discordant_read_pair&read_depth	5X
3	131708178	131713446	deletion	5kb mate-pair	discordant_read_pair&read_depth	5X
3	136021016	136026387	deletion	5kb mate-pair	discordant_read_pair&read_depth	5X
3	146385164	146390734	deletion	5kb mate-pair	discordant_read_pair&read_depth	5X
3	148280742	148285508	deletion	5kb mate-pair	discordant_read_pair&read_depth	5X
3	162510001	162625000	deletion	5kb mate-pair	discordant_read_pair&read_depth	5X
3	162525680	162547762	deletion	5kb mate-pair	discordant_read_pair&read_depth	5X
3	162717142	162723904	deletion	5kb mate-pair	discordant_read_pair&read_depth	5X
3	162764905	162769189	deletion	5kb mate-pair	discordant_read_pair&read_depth	5X
3	177294365	177297656	deletion	5kb mate-pair	discordant_read_pair&read_depth	5X
3	177381205	177385442	deletion	5kb mate-pair	discordant_read_pair&read_depth	5X
3	186580971	186585308	deletion	5kb mate-pair	discordant_read_pair&read_depth	5X
3	189737339	189740913	deletion	5kb mate-pair	discordant_read_pair&read_depth	5X
3	192875307	192885544	deletion	5kb mate-pair	discordant_read_pair&read_depth	5X
3	195195001	195230000	deletion	5kb mate-pair	discordant_read_pair&read_depth	5X
3	196934483	196939363	deletion	5kb mate-pair	discordant_read_pair&read_depth	5X
4	15001	70000	duplication	5kb mate-pair	discordant_read_pair&read_depth	5X
4	3613122	3620116	deletion	5kb mate-pair	discordant_read_pair&read_depth	5X
4	4121822	4153006	deletion	5kb mate-pair	discordant_read_pair&read_depth	5X
4	6897098	6900634	deletion	5kb mate-pair	discordant_read_pair&read_depth	5X
4	8799204	8818206	deletion	5kb mate-pair	discordant_read_pair&read_depth	5X
4	9160001	9215000	deletion	5kb mate-pair	discordant_read_pair&read_depth	5X
4	9456761	9481631	deletion	5kb mate-pair	discordant_read_pair&read_depth	5X
4	10210757	10234838	deletion	5kb mate-pair	discordant_read_pair&read_depth	5X
4	10392278	10402247	deletion	5kb mate-pair	discordant_read_pair&read_depth	5X
4	21160883	21167103	deletion	5kb mate-pair	discordant_read_pair&read_depth	5X
4	31820644	31837699	deletion	5kb mate-pair	discordant_read_pair&read_depth	5X
4	32834208	32841930	deletion	5kb mate-pair	discordant_read_pair&read_depth	5X
4	34779920	34829074	deletion	5kb mate-pair	discordant_read_pair&read_depth	5X
4	46055650	46058919	deletion	5kb mate-pair	discordant_read_pair&read_depth	5X
4	49094259	49098429	deletion	5kb mate-pair	discordant_read_pair&read_depth	5X
4	49174939	49250057	deletion	5kb mate-pair	discordant_read_pair&read_depth	5X
4	49512125	49518560	duplication	5kb mate-pair	discordant_read_pair&read_depth	5X
4	49636013	49657827	duplication	5kb mate-pair	discordant_read_pair&read_depth	5X
4	59944106	59951113	deletion	5kb mate-pair	discordant_read_pair&read_depth	5X
4	61329943	61333366	deletion	5kb mate-pair	discordant_read_pair&read_depth	5X
4	61939085	61942403	deletion	5kb mate-pair	discordant_read_pair&read_depth	5X
4	68264290	68266760	duplication	5kb mate-pair	discordant_read_pair&read_depth	5X
4	69375001	69490000	deletion	5kb mate-pair	discordant_read_pair&read_depth	5X
4	70125001	70235000	deletion	5kb mate-pair	discordant_read_pair&read_depth	5X
4	75285001	75320000	deletion	5kb mate-pair	discordant_read_pair&read_depth	5X
4	75642738	75648802	deletion	5kb mate-pair	discordant_read_pair&read_depth	5X
4	79268936	79275255	deletion	5kb mate-pair	discordant_read_pair&read_depth	5X
4	80887984	80894141	deletion	5kb mate-pair	discordant_read_pair&read_depth	5X
4	86976330	86980116	deletion	5kb mate-pair	discordant_read_pair&read_depth	5X
4	88268049	88274436	deletion	5kb mate-pair	discordant_read_pair&read_depth	5X
4	91596726	91602915	deletion	5kb mate-pair	discordant_read_pair&read_depth	5X
4	91931542	91935871	deletion	5kb mate-pair	discordant_read_pair&read_depth	5X
4	103329415	103332156	deletion	5kb mate-pair	discordant_read_pair&read_depth	5X
4	103873074	103875611	deletion	5kb mate-pair	discordant_read_pair&read_depth	5X
4	107604026	107609469	deletion	5kb mate-pair	discordant_read_pair&read_depth	5X
4	108127785	108131797	deletion	5kb mate-pair	discordant_read_pair&read_depth	5X
4	108276639	108279533	deletion	5kb mate-pair	discordant_read_pair&read_depth	5X
4	113498169	113501742	deletion	5kb mate-pair	discordant_read_pair&read_depth	5X
4	115928565	115932474	deletion	5kb mate-pair	discordant_read_pair&read_depth	5X
4	116166905	116177714	deletion	5kb mate-pair	discordant_read_pair&read_depth	5X
4	139468827	139473256	deletion	5kb mate-pair	discordant_read_pair&read_depth	5X
4	145316370	145319916	deletion	5kb mate-pair	discordant_read_pair&read_depth	5X
4	161043539	161075791	deletion	5kb mate-pair	discordant_read_pair&read_depth	5X
4	161878588	161884943	deletion	5kb mate-pair	discordant_read_pair&read_depth	5X
4	163393781	163397372	deletion	5kb mate-pair	discordant_read_pair&read_depth	5X
4	166002342	166005158	deletion	5kb mate-pair	discordant_read_pair&read_depth	5X
4	167676861	167683237	deletion	5kb mate-pair	discordant_read_pair&read_depth	5X
4	172988488	172992940	deletion	5kb mate-pair	discordant_read_pair&read_depth	5X
4	173425003	173433654	deletion	5kb mate-pair	discordant_read_pair&read_depth	5X
4	186441393	186444481	deletion	5kb mate-pair	discordant_read_pair&read_depth	5X
4	187093416	187098347	deletion	5kb mate-pair	discordant_read_pair&read_depth	5X
4	187353472	187358200	deletion	5kb mate-pair	discordant_read_pair&read_depth	5X
4	190057888	190064355	deletion	5kb mate-pair	discordant_read_pair&read_depth	5X
4	190470001	190685000	duplication	5kb mate-pair	discordant_read_pair&read_depth	5X
4	190604076	190610360	deletion	5kb mate-pair	discordant_read_pair&read_depth	5X
4	190795001	191045000	duplication	5kb mate-pair	discordant_read_pair&read_depth	5X
5	355991	360349	deletion	5kb mate-pair	discordant_read_pair&read_depth	5X
5	685001	700000	deletion	5kb mate-pair	discordant_read_pair&read_depth	5X
5	1178257	1181075	deletion	5kb mate-pair	discordant_read_pair&read_depth	5X
5	1968357	1972017	deletion	5kb mate-pair	discordant_read_pair&read_depth	5X
5	12810938	12821023	deletion	5kb mate-pair	discordant_read_pair&read_depth	5X
5	13416463	13422929	deletion	5kb mate-pair	discordant_read_pair&read_depth	5X
5	17712859	17715761	duplication	5kb mate-pair	discordant_read_pair&read_depth	5X
5	21479514	21496490	duplication	5kb mate-pair	discordant_read_pair&read_depth	5X
5	23902845	23906321	deletion	5kb mate-pair	discordant_read_pair&read_depth	5X
5	24370498	24373433	deletion	5kb mate-pair	discordant_read_pair&read_depth	5X
5	26796684	26802008	deletion	5kb mate-pair	discordant_read_pair&read_depth	5X
5	34179493	34197396	duplication	5kb mate-pair	discordant_read_pair&read_depth	5X
5	34304724	34308485	deletion	5kb mate-pair	discordant_read_pair&read_depth	5X
5	46270599	46275849	deletion	5kb mate-pair	discordant_read_pair&read_depth	5X
5	57323461	57333782	deletion	5kb mate-pair	discordant_read_pair&read_depth	5X
5	57679959	57686353	deletion	5kb mate-pair	discordant_read_pair&read_depth	5X
5	63698291	63701751	deletion	5kb mate-pair	discordant_read_pair&read_depth	5X
5	65027884	65030480	deletion	5kb mate-pair	discordant_read_pair&read_depth	5X
5	69235001	69280000	deletion	5kb mate-pair	discordant_read_pair&read_depth	5X
5	69410001	69445000	deletion	5kb mate-pair	discordant_read_pair&read_depth	5X
5	69740001	69780000	deletion	5kb mate-pair	discordant_read_pair&read_depth	5X
5	83947957	83955351	deletion	5kb mate-pair	discordant_read_pair&read_depth	5X
5	86114965	86118430	deletion	5kb mate-pair	discordant_read_pair&read_depth	5X
5	90499547	90502108	deletion	5kb mate-pair	discordant_read_pair&read_depth	5X
5	98344718	98348006	deletion	5kb mate-pair	discordant_read_pair&read_depth	5X
5	98839469	98842896	deletion	5kb mate-pair	discordant_read_pair&read_depth	5X
5	103854217	103860356	deletion	5kb mate-pair	discordant_read_pair&read_depth	5X
5	104431980	104503686	deletion	5kb mate-pair	discordant_read_pair&read_depth	5X
5	106236314	106240013	deletion	5kb mate-pair	discordant_read_pair&read_depth	5X
5	117386720	117393890	deletion	5kb mate-pair	discordant_read_pair&read_depth	5X
5	119378194	119382834	deletion	5kb mate-pair	discordant_read_pair&read_depth	5X
5	135100001	135130000	deletion	5kb mate-pair	discordant_read_pair&read_depth	5X
5	135115118	135120722	deletion	5kb mate-pair	discordant_read_pair&read_depth	5X
5	137807337	137817087	deletion	5kb mate-pair	discordant_read_pair&read_depth	5X
5	155138671	155188810	deletion	5kb mate-pair	discordant_read_pair&read_depth	5X
5	176387208	176390396	deletion	5kb mate-pair	discordant_read_pair&read_depth	5X
5	177190001	177210000	deletion	5kb mate-pair	discordant_read_pair&read_depth	5X
5	177220001	177245000	deletion	5kb mate-pair	discordant_read_pair&read_depth	5X
5	177330001	177350000	deletion	5kb mate-pair	discordant_read_pair&read_depth	5X
5	178108808	178113507	deletion	5kb mate-pair	discordant_read_pair&read_depth	5X
6	255001	385000	duplication	5kb mate-pair	discordant_read_pair&read_depth	5X
6	23743231	23745978	deletion	5kb mate-pair	discordant_read_pair&read_depth	5X
6	24811871	24817990	deletion	5kb mate-pair	discordant_read_pair&read_depth	5X
6	29685405	29688244	deletion	5kb mate-pair	discordant_read_pair&read_depth	5X
6	29843442	29850053	deletion	5kb mate-pair	discordant_read_pair&read_depth	5X
6	31421475	31424741	deletion	5kb mate-pair	discordant_read_pair&read_depth	5X
6	32455001	32635000	deletion	5kb mate-pair	discordant_read_pair&read_depth	5X
6	32561911	32564785	deletion	5kb mate-pair	discordant_read_pair&read_depth	5X
6	33583061	33585895	deletion	5kb mate-pair	discordant_read_pair&read_depth	5X
6	33937814	33943033	deletion	5kb mate-pair	discordant_read_pair&read_depth	5X
6	35755209	35766306	duplication	5kb mate-pair	discordant_read_pair&read_depth	5X
6	48930845	48938525	deletion	5kb mate-pair	discordant_read_pair&read_depth	5X
6	51739334	51745768	deletion	5kb mate-pair	discordant_read_pair&read_depth	5X
6	53928432	53934830	deletion	5kb mate-pair	discordant_read_pair&read_depth	5X
6	55825870	55847032	deletion	5kb mate-pair	discordant_read_pair&read_depth	5X
6	57205001	57610000	duplication	5kb mate-pair	discordant_read_pair&read_depth	5X
6	57284874	57289391	deletion	5kb mate-pair	discordant_read_pair&read_depth	5X
6	57296776	57301525	deletion	5kb mate-pair	discordant_read_pair&read_depth	5X
6	57423093	57429239	deletion	5kb mate-pair	discordant_read_pair&read_depth	5X
6	57583254	57590293	deletion	5kb mate-pair	discordant_read_pair&read_depth	5X
6	57622903	57628620	deletion	5kb mate-pair	discordant_read_pair&read_depth	5X
6	58423735	58429002	deletion	5kb mate-pair	discordant_read_pair&read_depth	5X
6	58773769	58780129	duplication	5kb mate-pair	discordant_read_pair&read_depth	5X
6	66398503	66404956	deletion	5kb mate-pair	discordant_read_pair&read_depth	5X
6	67008340	67049062	deletion	5kb mate-pair	discordant_read_pair&read_depth	5X
6	67040758	67043372	deletion	5kb mate-pair	discordant_read_pair&read_depth	5X
6	72863853	72873550	deletion	5kb mate-pair	discordant_read_pair&read_depth	5X
6	74613601	74620379	deletion	5kb mate-pair	discordant_read_pair&read_depth	5X
6	77097359	77103373	deletion	5kb mate-pair	discordant_read_pair&read_depth	5X
6	78967144	79036592	deletion	5kb mate-pair	discordant_read_pair&read_depth	5X
6	85318136	85324288	deletion	5kb mate-pair	discordant_read_pair&read_depth	5X
6	86708713	86714941	deletion	5kb mate-pair	discordant_read_pair&read_depth	5X
6	101934112	101939307	deletion	5kb mate-pair	discordant_read_pair&read_depth	5X
6	103737281	103762887	deletion	5kb mate-pair	discordant_read_pair&read_depth	5X
6	103939608	103943747	deletion	5kb mate-pair	discordant_read_pair&read_depth	5X
6	105260524	105264186	deletion	5kb mate-pair	discordant_read_pair&read_depth	5X
6	129319531	129325939	deletion	5kb mate-pair	discordant_read_pair&read_depth	5X
6	132114080	132119017	deletion	5kb mate-pair	discordant_read_pair&read_depth	5X
6	132374931	132378913	deletion	5kb mate-pair	discordant_read_pair&read_depth	5X
6	132706894	132712980	deletion	5kb mate-pair	discordant_read_pair&read_depth	5X
6	153029948	153033964	deletion	5kb mate-pair	discordant_read_pair&read_depth	5X
6	157699649	157703321	deletion	5kb mate-pair	discordant_read_pair&read_depth	5X
6	165724677	165733047	deletion	5kb mate-pair	discordant_read_pair&read_depth	5X
6	171010001	171045000	deletion	5kb mate-pair	discordant_read_pair&read_depth	5X
7	1	20000	deletion	5kb mate-pair	discordant_read_pair&read_depth	5X
7	1184260	1187936	deletion	5kb mate-pair	discordant_read_pair&read_depth	5X
7	1856001	1863652	deletion	5kb mate-pair	discordant_read_pair&read_depth	5X
7	13021907	13028731	deletion	5kb mate-pair	discordant_read_pair&read_depth	5X
7	25057116	25059982	deletion	5kb mate-pair	discordant_read_pair&read_depth	5X
7	26136938	26145819	deletion	5kb mate-pair	discordant_read_pair&read_depth	5X
7	31315565	31319050	deletion	5kb mate-pair	discordant_read_pair&read_depth	5X
7	32390065	32393553	deletion	5kb mate-pair	discordant_read_pair&read_depth	5X
7	32774501	32777655	deletion	5kb mate-pair	discordant_read_pair&read_depth	5X
7	38388456	38398113	deletion	5kb mate-pair	discordant_read_pair&read_depth	5X
7	39820045	39826128	deletion	5kb mate-pair	discordant_read_pair&read_depth	5X
7	49719843	49725924	deletion	5kb mate-pair	discordant_read_pair&read_depth	5X
7	51594027	51598787	deletion	5kb mate-pair	discordant_read_pair&read_depth	5X
7	56217750	56220384	deletion	5kb mate-pair	discordant_read_pair&read_depth	5X
7	56761925	56769982	deletion	5kb mate-pair	discordant_read_pair&read_depth	5X
7	57655001	57775000	duplication	5kb mate-pair	discordant_read_pair&read_depth	5X
7	61514366	61527572	deletion	5kb mate-pair	discordant_read_pair&read_depth	5X
7	61848341	61860360	deletion	5kb mate-pair	discordant_read_pair&read_depth	5X
7	61907794	61915107	deletion	5kb mate-pair	discordant_read_pair&read_depth	5X
7	61967166	61971300	duplication	5kb mate-pair	discordant_read_pair&read_depth	5X
7	61969632	61977464	deletion	5kb mate-pair	discordant_read_pair&read_depth	5X
7	62001777	62004952	deletion	5kb mate-pair	discordant_read_pair&read_depth	5X
7	64315692	64318686	deletion	5kb mate-pair	discordant_read_pair&read_depth	5X
7	64718160	64725234	deletion	5kb mate-pair	discordant_read_pair&read_depth	5X
7	64950001	65065000	duplication	5kb mate-pair	discordant_read_pair&read_depth	5X
7	65857561	65860399	deletion	5kb mate-pair	discordant_read_pair&read_depth	5X
7	72270200	72276040	deletion	5kb mate-pair	discordant_read_pair&read_depth	5X
7	73828246	73831470	deletion	5kb mate-pair	discordant_read_pair&read_depth	5X
7	74630001	74930000	deletion	5kb mate-pair	discordant_read_pair&read_depth	5X
7	91213932	91222206	deletion	5kb mate-pair	discordant_read_pair&read_depth	5X
7	93416936	93423213	deletion	5kb mate-pair	discordant_read_pair&read_depth	5X
7	96475900	96482054	deletion	5kb mate-pair	discordant_read_pair&read_depth	5X
7	96543235	96546823	deletion	5kb mate-pair	discordant_read_pair&read_depth	5X
7	97394202	97402860	deletion	5kb mate-pair	discordant_read_pair&read_depth	5X
7	100554759	100607284	deletion	5kb mate-pair	discordant_read_pair&read_depth	5X
7	101001035	101005790	deletion	5kb mate-pair	discordant_read_pair&read_depth	5X
7	101290001	101330000	deletion	5kb mate-pair	discordant_read_pair&read_depth	5X
7	102125001	102195000	duplication	5kb mate-pair	discordant_read_pair&read_depth	5X
7	102205001	102315000	duplication	5kb mate-pair	discordant_read_pair&read_depth	5X
7	110181932	110188443	deletion	5kb mate-pair	discordant_read_pair&read_depth	5X
7	113416146	113422227	deletion	5kb mate-pair	discordant_read_pair&read_depth	5X
7	126045851	126051440	deletion	5kb mate-pair	discordant_read_pair&read_depth	5X
7	127214928	127218052	deletion	5kb mate-pair	discordant_read_pair&read_depth	5X
7	141765393	141794817	deletion	5kb mate-pair	discordant_read_pair&read_depth	5X
7	142458746	142485935	duplication	5kb mate-pair	discordant_read_pair&read_depth	5X
7	143295001	143400000	deletion	5kb mate-pair	discordant_read_pair&read_depth	5X
7	143510001	143530000	deletion	5kb mate-pair	discordant_read_pair&read_depth	5X
7	143890001	143985000	duplication	5kb mate-pair	discordant_read_pair&read_depth	5X
7	148072843	148076343	deletion	5kb mate-pair	discordant_read_pair&read_depth	5X
7	149736910	149740516	deletion	5kb mate-pair	discordant_read_pair&read_depth	5X
7	152280656	152284668	deletion	5kb mate-pair	discordant_read_pair&read_depth	5X
7	156386988	156394386	deletion	5kb mate-pair	discordant_read_pair&read_depth	5X
8	1	25000	deletion	5kb mate-pair	discordant_read_pair&read_depth	5X
8	594387	599433	deletion	5kb mate-pair	discordant_read_pair&read_depth	5X
8	963569	967644	deletion	5kb mate-pair	discordant_read_pair&read_depth	5X
8	1340001	1355000	deletion	5kb mate-pair	discordant_read_pair&read_depth	5X
8	6991544	6995430	deletion	5kb mate-pair	discordant_read_pair&read_depth	5X
8	7050001	7110000	deletion	5kb mate-pair	discordant_read_pair&read_depth	5X
8	7155001	7195000	deletion	5kb mate-pair	discordant_read_pair&read_depth	5X
8	11895001	11975000	deletion	5kb mate-pair	discordant_read_pair&read_depth	5X
8	12075001	12250000	deletion	5kb mate-pair	discordant_read_pair&read_depth	5X
8	12360001	12455000	duplication	5kb mate-pair	discordant_read_pair&read_depth	5X
8	12427810	12432880	deletion	5kb mate-pair	discordant_read_pair&read_depth	5X
8	24972432	24991348	deletion	5kb mate-pair	discordant_read_pair&read_depth	5X
8	25066395	25071047	deletion	5kb mate-pair	discordant_read_pair&read_depth	5X
8	32679864	32691913	deletion	5kb mate-pair	discordant_read_pair&read_depth	5X
8	39230001	39385000	deletion	5kb mate-pair	discordant_read_pair&read_depth	5X
8	39885585	39891116	deletion	5kb mate-pair	discordant_read_pair&read_depth	5X
8	40774584	40779841	deletion	5kb mate-pair	discordant_read_pair&read_depth	5X
8	42190339	42194522	deletion	5kb mate-pair	discordant_read_pair&read_depth	5X
8	47525041	47544486	duplication	5kb mate-pair	discordant_read_pair&read_depth	5X
8	58118266	58123519	duplication	5kb mate-pair	discordant_read_pair&read_depth	5X
8	64708734	64715938	deletion	5kb mate-pair	discordant_read_pair&read_depth	5X
8	73787777	73793816	deletion	5kb mate-pair	discordant_read_pair&read_depth	5X
8	75362826	75366986	deletion	5kb mate-pair	discordant_read_pair&read_depth	5X
8	86725001	86840000	duplication	5kb mate-pair	discordant_read_pair&read_depth	5X
8	94072300	94077365	deletion	5kb mate-pair	discordant_read_pair&read_depth	5X
8	96875177	96880191	deletion	5kb mate-pair	discordant_read_pair&read_depth	5X
8	112294055	112297133	deletion	5kb mate-pair	discordant_read_pair&read_depth	5X
8	120154502	120161473	deletion	5kb mate-pair	discordant_read_pair&read_depth	5X
8	126595109	126601415	deletion	5kb mate-pair	discordant_read_pair&read_depth	5X
8	127191166	127194766	deletion	5kb mate-pair	discordant_read_pair&read_depth	5X
8	129465160	129471263	deletion	5kb mate-pair	discordant_read_pair&read_depth	5X
8	132277388	132280606	deletion	5kb mate-pair	discordant_read_pair&read_depth	5X
8	135082917	135089047	deletion	5kb mate-pair	discordant_read_pair&read_depth	5X
8	137160176	137163907	deletion	5kb mate-pair	discordant_read_pair&read_depth	5X
8	144700104	144714721	deletion	5kb mate-pair	discordant_read_pair&read_depth	5X
8	145190001	145215000	deletion	5kb mate-pair	discordant_read_pair&read_depth	5X
8	145290001	145500000	deletion	5kb mate-pair	discordant_read_pair&read_depth	5X
9	15815068	15821983	deletion	5kb mate-pair	discordant_read_pair&read_depth	5X
9	17908958	17912854	deletion	5kb mate-pair	discordant_read_pair&read_depth	5X
9	22496499	22504597	deletion	5kb mate-pair	discordant_read_pair&read_depth	5X
9	23362632	23377894	deletion	5kb mate-pair	discordant_read_pair&read_depth	5X
9	29092510	29098084	deletion	5kb mate-pair	discordant_read_pair&read_depth	5X
9	39090001	39185000	duplication	5kb mate-pair	discordant_read_pair&read_depth	5X
9	41090001	41220000	deletion	5kb mate-pair	discordant_read_pair&read_depth	5X
9	42140001	42240000	duplication	5kb mate-pair	discordant_read_pair&read_depth	5X
9	42415001	42535000	duplication	5kb mate-pair	discordant_read_pair&read_depth	5X
9	42880001	43165000	duplication	5kb mate-pair	discordant_read_pair&read_depth	5X
9	43605001	43630000	deletion	5kb mate-pair	discordant_read_pair&read_depth	5X
9	43925001	44060000	deletion	5kb mate-pair	discordant_read_pair&read_depth	5X
9	44240001	44280000	deletion	5kb mate-pair	discordant_read_pair&read_depth	5X
9	44480001	44730000	deletion	5kb mate-pair	discordant_read_pair&read_depth	5X
9	45005001	45025000	deletion	5kb mate-pair	discordant_read_pair&read_depth	5X
9	45350001	45485000	duplication	5kb mate-pair	discordant_read_pair&read_depth	5X
9	65655001	65700000	deletion	5kb mate-pair	discordant_read_pair&read_depth	5X
9	66075001	66245000	deletion	5kb mate-pair	discordant_read_pair&read_depth	5X
9	66340001	66455000	deletion	5kb mate-pair	discordant_read_pair&read_depth	5X
9	66455001	66585000	duplication	5kb mate-pair	discordant_read_pair&read_depth	5X
9	66462137	66478644	deletion	5kb mate-pair	discordant_read_pair&read_depth	5X
9	66665001	66865000	duplication	5kb mate-pair	discordant_read_pair&read_depth	5X
9	66851160	66857757	deletion	5kb mate-pair	discordant_read_pair&read_depth	5X
9	67240001	67345000	duplication	5kb mate-pair	discordant_read_pair&read_depth	5X
9	67705001	67745000	deletion	5kb mate-pair	discordant_read_pair&read_depth	5X
9	67820001	67980000	duplication	5kb mate-pair	discordant_read_pair&read_depth	5X
9	68330001	68505000	duplication	5kb mate-pair	discordant_read_pair&read_depth	5X
9	68439642	68445627	deletion	5kb mate-pair	discordant_read_pair&read_depth	5X
9	68990001	69275000	duplication	5kb mate-pair	discordant_read_pair&read_depth	5X
9	70105001	70175000	duplication	5kb mate-pair	discordant_read_pair&read_depth	5X
9	70570001	70645000	duplication	5kb mate-pair	discordant_read_pair&read_depth	5X
9	70840001	70930000	duplication	5kb mate-pair	discordant_read_pair&read_depth	5X
9	71738116	71743720	deletion	5kb mate-pair	discordant_read_pair&read_depth	5X
9	73320001	73350000	deletion	5kb mate-pair	discordant_read_pair&read_depth	5X
9	78919201	78922619	deletion	5kb mate-pair	discordant_read_pair&read_depth	5X
9	79770088	79777443	duplication	5kb mate-pair	discordant_read_pair&read_depth	5X
9	83967792	83970711	deletion	5kb mate-pair	discordant_read_pair&read_depth	5X
9	84324331	84327019	deletion	5kb mate-pair	discordant_read_pair&read_depth	5X
9	96499744	96503277	deletion	5kb mate-pair	discordant_read_pair&read_depth	5X
9	101308975	101311657	deletion	5kb mate-pair	discordant_read_pair&read_depth	5X
9	104714847	104724616	deletion	5kb mate-pair	discordant_read_pair&read_depth	5X
9	110537532	110540619	deletion	5kb mate-pair	discordant_read_pair&read_depth	5X
9	133029900	133034822	deletion	5kb mate-pair	discordant_read_pair&read_depth	5X
9	138213945	138218373	deletion	5kb mate-pair	discordant_read_pair&read_depth	5X
9	140253407	140259072	deletion	5kb mate-pair	discordant_read_pair&read_depth	5X
10	5287257	5293362	deletion	5kb mate-pair	discordant_read_pair&read_depth	5X
10	5889248	5892919	deletion	5kb mate-pair	discordant_read_pair&read_depth	5X
10	6411525	6417645	deletion	5kb mate-pair	discordant_read_pair&read_depth	5X
10	31246316	31252793	deletion	5kb mate-pair	discordant_read_pair&read_depth	5X
10	32257874	32260652	deletion	5kb mate-pair	discordant_read_pair&read_depth	5X
10	38915001	38990000	duplication	5kb mate-pair	discordant_read_pair&read_depth	5X
10	42383247	42397009	duplication	5kb mate-pair	discordant_read_pair&read_depth	5X
10	42393717	42400662	duplication	5kb mate-pair	discordant_read_pair&read_depth	5X
10	42596811	42600446	duplication	5kb mate-pair	discordant_read_pair&read_depth	5X
10	42605001	42685000	duplication	5kb mate-pair	discordant_read_pair&read_depth	5X
10	42701409	42716853	deletion	5kb mate-pair	discordant_read_pair&read_depth	5X
10	42745001	42820000	duplication	5kb mate-pair	discordant_read_pair&read_depth	5X
10	46950001	47150000	duplication	5kb mate-pair	discordant_read_pair&read_depth	5X
10	47705001	47960000	deletion	5kb mate-pair	discordant_read_pair&read_depth	5X
10	48010001	48300000	deletion	5kb mate-pair	discordant_read_pair&read_depth	5X
10	51135001	51360000	deletion	5kb mate-pair	discordant_read_pair&read_depth	5X
10	51635001	51720000	deletion	5kb mate-pair	discordant_read_pair&read_depth	5X
10	51835001	52000000	deletion	5kb mate-pair	discordant_read_pair&read_depth	5X
10	53203240	53214224	deletion	5kb mate-pair	discordant_read_pair&read_depth	5X
10	71280983	71291379	deletion	5kb mate-pair	discordant_read_pair&read_depth	5X
10	72446016	72452184	deletion	5kb mate-pair	discordant_read_pair&read_depth	5X
10	78255565	78261022	deletion	5kb mate-pair	discordant_read_pair&read_depth	5X
10	81475001	81505000	deletion	5kb mate-pair	discordant_read_pair&read_depth	5X
10	90794892	90801999	duplication	5kb mate-pair	discordant_read_pair&read_depth	5X
10	94134213	94137685	deletion	5kb mate-pair	discordant_read_pair&read_depth	5X
10	99034779	99037439	deletion	5kb mate-pair	discordant_read_pair&read_depth	5X
10	100687130	100702755	deletion	5kb mate-pair	discordant_read_pair&read_depth	5X
10	111572078	111578393	deletion	5kb mate-pair	discordant_read_pair&read_depth	5X
10	114110001	114120000	deletion	5kb mate-pair	discordant_read_pair&read_depth	5X
10	114112186	114116762	deletion	5kb mate-pair	discordant_read_pair&read_depth	5X
10	118766007	118769597	deletion	5kb mate-pair	discordant_read_pair&read_depth	5X
10	127190785	127193282	duplication	5kb mate-pair	discordant_read_pair&read_depth	5X
10	132635598	132638846	deletion	5kb mate-pair	discordant_read_pair&read_depth	5X
10	132909032	132913099	deletion	5kb mate-pair	discordant_read_pair&read_depth	5X
10	132986714	132991288	deletion	5kb mate-pair	discordant_read_pair&read_depth	5X
10	134930001	134955000	deletion	5kb mate-pair	discordant_read_pair&read_depth	5X
10	134948748	134953015	deletion	5kb mate-pair	discordant_read_pair&read_depth	5X
11	1915219	1936947	deletion	5kb mate-pair	discordant_read_pair&read_depth	5X
11	3270001	3355000	deletion	5kb mate-pair	discordant_read_pair&read_depth	5X
11	4250001	4315000	deletion	5kb mate-pair	discordant_read_pair&read_depth	5X
11	4967104	4976848	deletion	5kb mate-pair	discordant_read_pair&read_depth	5X
11	24349445	24355632	deletion	5kb mate-pair	discordant_read_pair&read_depth	5X
11	29007121	29012975	deletion	5kb mate-pair	discordant_read_pair&read_depth	5X
11	31392979	31397659	deletion	5kb mate-pair	discordant_read_pair&read_depth	5X
11	47057560	47063752	deletion	5kb mate-pair	discordant_read_pair&read_depth	5X
11	48340001	48390000	duplication	5kb mate-pair	discordant_read_pair&read_depth	5X
11	48367448	48373952	deletion	5kb mate-pair	discordant_read_pair&read_depth	5X
11	48600853	48604312	deletion	5kb mate-pair	discordant_read_pair&read_depth	5X
11	51340984	51363075	deletion	5kb mate-pair	discordant_read_pair&read_depth	5X
11	51572206	51574353	duplication	5kb mate-pair	discordant_read_pair&read_depth	5X
11	51576920	51592781	duplication	5kb mate-pair	discordant_read_pair&read_depth	5X
11	55365001	55460000	deletion	5kb mate-pair	discordant_read_pair&read_depth	5X
11	60975001	61010000	deletion	5kb mate-pair	discordant_read_pair&read_depth	5X
11	67641757	67645234	deletion	5kb mate-pair	discordant_read_pair&read_depth	5X
11	69089779	69139920	deletion	5kb mate-pair	discordant_read_pair&read_depth	5X
11	81854594	81863371	deletion	5kb mate-pair	discordant_read_pair&read_depth	5X
11	89625001	89650000	deletion	5kb mate-pair	discordant_read_pair&read_depth	5X
11	92869786	92875911	deletion	5kb mate-pair	discordant_read_pair&read_depth	5X
11	93153135	93160240	deletion	5kb mate-pair	discordant_read_pair&read_depth	5X
11	93969651	93972273	duplication	5kb mate-pair	discordant_read_pair&read_depth	5X
11	95169282	95175434	deletion	5kb mate-pair	discordant_read_pair&read_depth	5X
11	101565904	101575309	deletion	5kb mate-pair	discordant_read_pair&read_depth	5X
11	104267738	104273400	deletion	5kb mate-pair	discordant_read_pair&read_depth	5X
11	114470001	114490000	deletion	5kb mate-pair	discordant_read_pair&read_depth	5X
11	124774058	124778494	deletion	5kb mate-pair	discordant_read_pair&read_depth	5X
11	134601944	134607748	deletion	5kb mate-pair	discordant_read_pair&read_depth	5X
12	292117	298060	deletion	5kb mate-pair	discordant_read_pair&read_depth	5X
12	377309	384974	deletion	5kb mate-pair	discordant_read_pair&read_depth	5X
12	1194257	1200524	deletion	5kb mate-pair	discordant_read_pair&read_depth	5X
12	7189832	7239949	deletion	5kb mate-pair	discordant_read_pair&read_depth	5X
12	8556529	8591529	deletion	5kb mate-pair	discordant_read_pair&read_depth	5X
12	9635001	9735000	deletion	5kb mate-pair	discordant_read_pair&read_depth	5X
12	11504214	11546958	deletion	5kb mate-pair	discordant_read_pair&read_depth	5X
12	22570001	22585000	deletion	5kb mate-pair	discordant_read_pair&read_depth	5X
12	34844292	34849330	deletion	5kb mate-pair	discordant_read_pair&read_depth	5X
12	37991186	37994760	deletion	5kb mate-pair	discordant_read_pair&read_depth	5X
12	38010054	38018236	deletion	5kb mate-pair	discordant_read_pair&read_depth	5X
12	45902942	45910036	deletion	5kb mate-pair	discordant_read_pair&read_depth	5X
12	48725415	48728482	deletion	5kb mate-pair	discordant_read_pair&read_depth	5X
12	70594621	70597760	deletion	5kb mate-pair	discordant_read_pair&read_depth	5X
12	80154968	80162679	duplication	5kb mate-pair	discordant_read_pair&read_depth	5X
12	84592885	84596076	deletion	5kb mate-pair	discordant_read_pair&read_depth	5X
12	90486374	90492034	deletion	5kb mate-pair	discordant_read_pair&read_depth	5X
12	96232985	96236350	deletion	5kb mate-pair	discordant_read_pair&read_depth	5X
12	96340297	96343015	deletion	5kb mate-pair	discordant_read_pair&read_depth	5X
12	98955391	98959057	deletion	5kb mate-pair	discordant_read_pair&read_depth	5X
12	99793749	99802785	deletion	5kb mate-pair	discordant_read_pair&read_depth	5X
12	100287892	100291975	deletion	5kb mate-pair	discordant_read_pair&read_depth	5X
12	102102373	102107163	deletion	5kb mate-pair	discordant_read_pair&read_depth	5X
12	122530515	122581130	deletion	5kb mate-pair	discordant_read_pair&read_depth	5X
12	132635001	132655000	deletion	5kb mate-pair	discordant_read_pair&read_depth	5X
13	23632372	23637438	deletion	5kb mate-pair	discordant_read_pair&read_depth	5X
13	30215703	30221958	deletion	5kb mate-pair	discordant_read_pair&read_depth	5X
13	39057214	39060206	deletion	5kb mate-pair	discordant_read_pair&read_depth	5X
13	51069294	51075227	deletion	5kb mate-pair	discordant_read_pair&read_depth	5X
13	53095001	53115000	deletion	5kb mate-pair	discordant_read_pair&read_depth	5X
13	67174447	67177475	deletion	5kb mate-pair	discordant_read_pair&read_depth	5X
13	72477266	72480615	deletion	5kb mate-pair	discordant_read_pair&read_depth	5X
13	72807585	72812370	deletion	5kb mate-pair	discordant_read_pair&read_depth	5X
13	72842942	72847264	deletion	5kb mate-pair	discordant_read_pair&read_depth	5X
13	83165903	83172454	deletion	5kb mate-pair	discordant_read_pair&read_depth	5X
13	99254119	99258513	deletion	5kb mate-pair	discordant_read_pair&read_depth	5X
13	101894094	101897282	deletion	5kb mate-pair	discordant_read_pair&read_depth	5X
13	112935001	112965000	deletion	5kb mate-pair	discordant_read_pair&read_depth	5X
14	19000001	19125000	duplication	5kb mate-pair	discordant_read_pair&read_depth	5X
14	19200001	19320000	deletion	5kb mate-pair	discordant_read_pair&read_depth	5X
14	20550248	20555657	deletion	5kb mate-pair	discordant_read_pair&read_depth	5X
14	23105078	23110117	deletion	5kb mate-pair	discordant_read_pair&read_depth	5X
14	24442011	24485863	deletion	5kb mate-pair	discordant_read_pair&read_depth	5X
14	40609807	40617744	deletion	5kb mate-pair	discordant_read_pair&read_depth	5X
14	56908324	56914075	deletion	5kb mate-pair	discordant_read_pair&read_depth	5X
14	65360021	65363543	deletion	5kb mate-pair	discordant_read_pair&read_depth	5X
14	73996175	74025745	deletion	5kb mate-pair	discordant_read_pair&read_depth	5X
14	74239702	74246949	deletion	5kb mate-pair	discordant_read_pair&read_depth	5X
14	80105938	80115479	deletion	5kb mate-pair	discordant_read_pair&read_depth	5X
14	82499083	82503390	deletion	5kb mate-pair	discordant_read_pair&read_depth	5X
14	105576654	105579710	deletion	5kb mate-pair	discordant_read_pair&read_depth	5X
14	106330832	106369136	deletion	5kb mate-pair	discordant_read_pair&read_depth	5X
15	20000001	20150000	duplication	5kb mate-pair	discordant_read_pair&read_depth	5X
15	20280001	20320000	deletion	5kb mate-pair	discordant_read_pair&read_depth	5X
15	20390001	20580000	duplication	5kb mate-pair	discordant_read_pair&read_depth	5X
15	20581405	20589742	deletion	5kb mate-pair	discordant_read_pair&read_depth	5X
15	20630001	20845000	deletion	5kb mate-pair	discordant_read_pair&read_depth	5X
15	22045001	22290000	deletion	5kb mate-pair	discordant_read_pair&read_depth	5X
15	23671345	23675495	deletion	5kb mate-pair	discordant_read_pair&read_depth	5X
15	55218224	55224715	deletion	5kb mate-pair	discordant_read_pair&read_depth	5X
15	68425716	68428939	deletion	5kb mate-pair	discordant_read_pair&read_depth	5X
15	71708595	71713734	deletion	5kb mate-pair	discordant_read_pair&read_depth	5X
15	72385074	72388407	deletion	5kb mate-pair	discordant_read_pair&read_depth	5X
15	76884571	76897291	deletion	5kb mate-pair	discordant_read_pair&read_depth	5X
15	82965001	82990000	deletion	5kb mate-pair	discordant_read_pair&read_depth	5X
15	83025001	83215000	deletion	5kb mate-pair	discordant_read_pair&read_depth	5X
15	83551580	83557684	deletion	5kb mate-pair	discordant_read_pair&read_depth	5X
15	84541352	84543839	deletion	5kb mate-pair	discordant_read_pair&read_depth	5X
15	84834230	84916926	deletion	5kb mate-pair	discordant_read_pair&read_depth	5X
15	86056917	86059378	deletion	5kb mate-pair	discordant_read_pair&read_depth	5X
15	101094532	101098787	deletion	5kb mate-pair	discordant_read_pair&read_depth	5X
16	8107110	8111431	deletion	5kb mate-pair	discordant_read_pair&read_depth	5X
16	14785001	14855000	deletion	5kb mate-pair	discordant_read_pair&read_depth	5X
16	15040001	15125000	duplication	5kb mate-pair	discordant_read_pair&read_depth	5X
16	16934362	16940406	deletion	5kb mate-pair	discordant_read_pair&read_depth	5X
16	18832528	18838473	deletion	5kb mate-pair	discordant_read_pair&read_depth	5X
16	19945490	19967727	deletion	5kb mate-pair	discordant_read_pair&read_depth	5X
16	21515001	21595000	duplication	5kb mate-pair	discordant_read_pair&read_depth	5X
16	21745001	21810000	duplication	5kb mate-pair	discordant_read_pair&read_depth	5X
16	22540001	22715000	duplication	5kb mate-pair	discordant_read_pair&read_depth	5X
16	25339551	25343501	deletion	5kb mate-pair	discordant_read_pair&read_depth	5X
16	33373879	33379406	deletion	5kb mate-pair	discordant_read_pair&read_depth	5X
16	33978801	33982017	deletion	5kb mate-pair	discordant_read_pair&read_depth	5X
16	34465001	34760000	duplication	5kb mate-pair	discordant_read_pair&read_depth	5X
16	46386304	46416294	duplication	5kb mate-pair	discordant_read_pair&read_depth	5X
16	46386542	46395488	duplication	5kb mate-pair	discordant_read_pair&read_depth	5X
16	46386555	46408761	duplication	5kb mate-pair	discordant_read_pair&read_depth	5X
16	46393410	46402946	deletion	5kb mate-pair	discordant_read_pair&read_depth	5X
16	46394258	46411369	deletion	5kb mate-pair	discordant_read_pair&read_depth	5X
16	46398645	46408170	duplication	5kb mate-pair	discordant_read_pair&read_depth	5X
16	46416807	46432906	duplication	5kb mate-pair	discordant_read_pair&read_depth	5X
16	46417082	46424830	duplication	5kb mate-pair	discordant_read_pair&read_depth	5X
16	46423710	46429480	duplication	5kb mate-pair	discordant_read_pair&read_depth	5X
16	62544203	62551034	deletion	5kb mate-pair	discordant_read_pair&read_depth	5X
16	76539127	76544031	deletion	5kb mate-pair	discordant_read_pair&read_depth	5X
16	84501082	84504279	deletion	5kb mate-pair	discordant_read_pair&read_depth	5X
16	85435001	85450000	deletion	5kb mate-pair	discordant_read_pair&read_depth	5X
17	193639	197065	deletion	5kb mate-pair	discordant_read_pair&read_depth	5X
17	5594596	5597677	deletion	5kb mate-pair	discordant_read_pair&read_depth	5X
17	12353145	12359262	deletion	5kb mate-pair	discordant_read_pair&read_depth	5X
17	16660001	16730000	duplication	5kb mate-pair	discordant_read_pair&read_depth	5X
17	18320001	18465000	deletion	5kb mate-pair	discordant_read_pair&read_depth	5X
17	18730001	18745000	deletion	5kb mate-pair	discordant_read_pair&read_depth	5X
17	21195001	21255000	duplication	5kb mate-pair	discordant_read_pair&read_depth	5X
17	21212571	21221393	deletion	5kb mate-pair	discordant_read_pair&read_depth	5X
17	21305001	21355000	duplication	5kb mate-pair	discordant_read_pair&read_depth	5X
17	21903054	21907082	duplication	5kb mate-pair	discordant_read_pair&read_depth	5X
17	25536556	25540526	deletion	5kb mate-pair	discordant_read_pair&read_depth	5X
17	26779803	26783528	deletion	5kb mate-pair	discordant_read_pair&read_depth	5X
17	34505001	34740000	deletion	5kb mate-pair	discordant_read_pair&read_depth	5X
17	35755344	35758972	deletion	5kb mate-pair	discordant_read_pair&read_depth	5X
17	36285001	36410000	duplication	5kb mate-pair	discordant_read_pair&read_depth	5X
17	39421710	39432343	deletion	5kb mate-pair	discordant_read_pair&read_depth	5X
17	41381816	41400783	duplication	5kb mate-pair	discordant_read_pair&read_depth	5X
17	41399674	41401206	duplication	5kb mate-pair	discordant_read_pair&read_depth	5X
17	41439344	41442268	duplication	5kb mate-pair	discordant_read_pair&read_depth	5X
17	44650001	44785000	deletion	5kb mate-pair	discordant_read_pair&read_depth	5X
17	51852779	51860742	deletion	5kb mate-pair	discordant_read_pair&read_depth	5X
17	55089581	55092857	deletion	5kb mate-pair	discordant_read_pair&read_depth	5X
17	77495001	77630000	deletion	5kb mate-pair	discordant_read_pair&read_depth	5X
17	81185001	81200000	deletion	5kb mate-pair	discordant_read_pair&read_depth	5X
18	106700	111937	duplication	5kb mate-pair	discordant_read_pair&read_depth	5X
18	15404725	15410294	duplication	5kb mate-pair	discordant_read_pair&read_depth	5X
18	18510947	18517508	duplication	5kb mate-pair	discordant_read_pair&read_depth	5X
18	30495157	30501296	deletion	5kb mate-pair	discordant_read_pair&read_depth	5X
18	38259751	38267122	deletion	5kb mate-pair	discordant_read_pair&read_depth	5X
18	38864768	38868386	deletion	5kb mate-pair	discordant_read_pair&read_depth	5X
18	47694961	47698408	deletion	5kb mate-pair	discordant_read_pair&read_depth	5X
18	51952918	51957055	deletion	5kb mate-pair	discordant_read_pair&read_depth	5X
18	63723640	63732480	deletion	5kb mate-pair	discordant_read_pair&read_depth	5X
18	63766770	63769359	deletion	5kb mate-pair	discordant_read_pair&read_depth	5X
18	68383631	68387659	deletion	5kb mate-pair	discordant_read_pair&read_depth	5X
18	75721800	75771994	deletion	5kb mate-pair	discordant_read_pair&read_depth	5X
18	76662088	76666592	deletion	5kb mate-pair	discordant_read_pair&read_depth	5X
19	90001	220000	duplication	5kb mate-pair	discordant_read_pair&read_depth	5X
19	1095001	1115000	deletion	5kb mate-pair	discordant_read_pair&read_depth	5X
19	8340001	8365000	deletion	5kb mate-pair	discordant_read_pair&read_depth	5X
19	12694823	12699008	deletion	5kb mate-pair	discordant_read_pair&read_depth	5X
19	15046384	15049512	deletion	5kb mate-pair	discordant_read_pair&read_depth	5X
19	20595796	20722956	deletion	5kb mate-pair	discordant_read_pair&read_depth	5X
19	21902489	21905706	deletion	5kb mate-pair	discordant_read_pair&read_depth	5X
19	27731933	27736806	duplication	5kb mate-pair	discordant_read_pair&read_depth	5X
19	27831410	27838298	deletion	5kb mate-pair	discordant_read_pair&read_depth	5X
19	29950175	29956703	deletion	5kb mate-pair	discordant_read_pair&read_depth	5X
19	30388800	30393109	deletion	5kb mate-pair	discordant_read_pair&read_depth	5X
19	35660667	35665871	deletion	5kb mate-pair	discordant_read_pair&read_depth	5X
19	36840588	36847332	deletion	5kb mate-pair	discordant_read_pair&read_depth	5X
19	40613061	40615916	deletion	5kb mate-pair	discordant_read_pair&read_depth	5X
19	46622711	46628328	deletion	5kb mate-pair	discordant_read_pair&read_depth	5X
19	50815001	50835000	deletion	5kb mate-pair	discordant_read_pair&read_depth	5X
19	51077892	51082651	deletion	5kb mate-pair	discordant_read_pair&read_depth	5X
19	52132658	52151365	deletion	5kb mate-pair	discordant_read_pair&read_depth	5X
19	53689097	53692038	deletion	5kb mate-pair	discordant_read_pair&read_depth	5X
20	1561084	1596097	deletion	5kb mate-pair	discordant_read_pair&read_depth	5X
20	2802906	2806408	deletion	5kb mate-pair	discordant_read_pair&read_depth	5X
20	25770001	25825000	deletion	5kb mate-pair	discordant_read_pair&read_depth	5X
20	25860001	25940000	duplication	5kb mate-pair	discordant_read_pair&read_depth	5X
20	25995001	26050000	deletion	5kb mate-pair	discordant_read_pair&read_depth	5X
20	26100001	26150000	duplication	5kb mate-pair	discordant_read_pair&read_depth	5X
20	26297381	26303043	deletion	5kb mate-pair	discordant_read_pair&read_depth	5X
20	29420001	29490000	duplication	5kb mate-pair	discordant_read_pair&read_depth	5X
20	29565001	29655000	duplication	5kb mate-pair	discordant_read_pair&read_depth	5X
20	29584186	29593183	deletion	5kb mate-pair	discordant_read_pair&read_depth	5X
20	29638749	29641517	deletion	5kb mate-pair	discordant_read_pair&read_depth	5X
20	31525402	31529630	deletion	5kb mate-pair	discordant_read_pair&read_depth	5X
20	32815889	32819523	deletion	5kb mate-pair	discordant_read_pair&read_depth	5X
20	42271331	42274869	deletion	5kb mate-pair	discordant_read_pair&read_depth	5X
20	42481207	42483870	deletion	5kb mate-pair	discordant_read_pair&read_depth	5X
20	52646982	52658389	deletion	5kb mate-pair	discordant_read_pair&read_depth	5X
20	54434381	54442304	deletion	5kb mate-pair	discordant_read_pair&read_depth	5X
20	60516857	60523662	deletion	5kb mate-pair	discordant_read_pair&read_depth	5X
20	62720001	62730000	deletion	5kb mate-pair	discordant_read_pair&read_depth	5X
21	9410001	9595000	duplication	5kb mate-pair	discordant_read_pair&read_depth	5X
21	9825001	10035000	duplication	5kb mate-pair	discordant_read_pair&read_depth	5X
21	10085001	10215000	duplication	5kb mate-pair	discordant_read_pair&read_depth	5X
21	10365001	10645000	duplication	5kb mate-pair	discordant_read_pair&read_depth	5X
21	10717660	10722700	duplication	5kb mate-pair	discordant_read_pair&read_depth	5X
21	10744001	10758224	deletion	5kb mate-pair	discordant_read_pair&read_depth	5X
21	10756263	10760527	deletion	5kb mate-pair	discordant_read_pair&read_depth	5X
21	10761731	10772911	deletion	5kb mate-pair	discordant_read_pair&read_depth	5X
21	11081210	11117354	deletion	5kb mate-pair	discordant_read_pair&read_depth	5X
21	11089077	11093168	deletion	5kb mate-pair	discordant_read_pair&read_depth	5X
21	11096665	11108478	deletion	5kb mate-pair	discordant_read_pair&read_depth	5X
21	11133097	11139278	deletion	5kb mate-pair	discordant_read_pair&read_depth	5X
21	14340001	14450000	duplication	5kb mate-pair	discordant_read_pair&read_depth	5X
21	42955536	43005746	deletion	5kb mate-pair	discordant_read_pair&read_depth	5X
21	43349876	43354173	deletion	5kb mate-pair	discordant_read_pair&read_depth	5X
21	44970286	44973749	deletion	5kb mate-pair	discordant_read_pair&read_depth	5X
22	16505001	16645000	deletion	5kb mate-pair	discordant_read_pair&read_depth	5X
22	16850001	16960000	duplication	5kb mate-pair	discordant_read_pair&read_depth	5X
22	17770220	17779242	deletion	5kb mate-pair	discordant_read_pair&read_depth	5X
22	18057453	18060581	deletion	5kb mate-pair	discordant_read_pair&read_depth	5X
22	18705001	18715000	deletion	5kb mate-pair	discordant_read_pair&read_depth	5X
22	18765001	18825000	duplication	5kb mate-pair	discordant_read_pair&read_depth	5X
22	20365001	20610000	deletion	5kb mate-pair	discordant_read_pair&read_depth	5X
22	20950133	20953869	deletion	5kb mate-pair	discordant_read_pair&read_depth	5X
22	21565001	21660000	duplication	5kb mate-pair	discordant_read_pair&read_depth	5X
22	21725001	21740000	deletion	5kb mate-pair	discordant_read_pair&read_depth	5X
22	21815001	21850000	deletion	5kb mate-pair	discordant_read_pair&read_depth	5X
22	22385001	22610000	deletion	5kb mate-pair	discordant_read_pair&read_depth	5X
22	22670001	23255000	deletion	5kb mate-pair	discordant_read_pair&read_depth	5X
22	24052710	24061826	duplication	5kb mate-pair	discordant_read_pair&read_depth	5X
22	24195918	24199662	deletion	5kb mate-pair	discordant_read_pair&read_depth	5X
22	24271879	24311362	deletion	5kb mate-pair	discordant_read_pair&read_depth	5X
22	31776041	31780652	deletion	5kb mate-pair	discordant_read_pair&read_depth	5X
22	37143063	37147873	deletion	5kb mate-pair	discordant_read_pair&read_depth	5X
22	50315001	50340000	deletion	5kb mate-pair	discordant_read_pair&read_depth	5X
22	50775001	50785000	deletion	5kb mate-pair	discordant_read_pair&read_depth	5X
X	1030001	1205000	deletion	5kb mate-pair	discordant_read_pair&read_depth	5X
X	1480001	1500000	deletion	5kb mate-pair	discordant_read_pair&read_depth	5X
X	1755645	1760509	deletion	5kb mate-pair	discordant_read_pair&read_depth	5X
X	2194704	2200651	deletion	5kb mate-pair	discordant_read_pair&read_depth	5X
X	5054884	5058083	deletion	5kb mate-pair	discordant_read_pair&read_depth	5X
X	7623786	7673895	deletion	5kb mate-pair	discordant_read_pair&read_depth	5X
X	9373754	9380735	duplication	5kb mate-pair	discordant_read_pair&read_depth	5X
X	10738591	10788695	deletion	5kb mate-pair	discordant_read_pair&read_depth	5X
X	11725333	11731447	deletion	5kb mate-pair	discordant_read_pair&read_depth	5X
X	12433940	12437163	deletion	5kb mate-pair	discordant_read_pair&read_depth	5X
X	34436900	34442885	deletion	5kb mate-pair	discordant_read_pair&read_depth	5X
X	44300024	44305101	deletion	5kb mate-pair	discordant_read_pair&read_depth	5X
X	67123781	67130354	deletion	5kb mate-pair	discordant_read_pair&read_depth	5X
X	70137220	70141442	deletion	5kb mate-pair	discordant_read_pair&read_depth	5X
X	77121327	77124483	deletion	5kb mate-pair	discordant_read_pair&read_depth	5X
X	78921801	78926082	deletion	5kb mate-pair	discordant_read_pair&read_depth	5X
X	81096656	81102987	deletion	5kb mate-pair	discordant_read_pair&read_depth	5X
X	81982314	81988093	deletion	5kb mate-pair	discordant_read_pair&read_depth	5X
X	85604957	85609942	deletion	5kb mate-pair	discordant_read_pair&read_depth	5X
X	95312154	95319119	deletion	5kb mate-pair	discordant_read_pair&read_depth	5X
X	101055427	101067735	duplication	5kb mate-pair	discordant_read_pair&read_depth	5X
X	103147651	103155507	deletion	5kb mate-pair	discordant_read_pair&read_depth	5X
X	108353169	108357910	deletion	5kb mate-pair	discordant_read_pair&read_depth	5X
X	118873169	118877521	deletion	5kb mate-pair	discordant_read_pair&read_depth	5X
X	120010001	120115000	deletion	5kb mate-pair	discordant_read_pair&read_depth	5X
X	126597669	126602598	deletion	5kb mate-pair	discordant_read_pair&read_depth	5X
X	143406942	143410076	deletion	5kb mate-pair	discordant_read_pair&read_depth	5X
X	144421889	144424804	deletion	5kb mate-pair	discordant_read_pair&read_depth	5X
X	148906424	148956424	deletion	5kb mate-pair	discordant_read_pair&read_depth	5X
X	152225001	152350000	deletion	5kb mate-pair	discordant_read_pair&read_depth	5X
X	154595001	154615000	deletion	5kb mate-pair	discordant_read_pair&read_depth	5X
X	154790098	154803579	deletion	5kb mate-pair	discordant_read_pair&read_depth	5X
